# Supplementary material for: Base-promoted direct and highly selective alkynylation of electron-deficient octafluorotoluene
Source: Royal Society of Chemistry journal article supplement (doi:10.1039/c5ra04279h), 2015-01-01
Supplement: c5ra04279h1.pdf [file c5ra04279h1.pdf]

# Electronic Supplementary Information

## Base-Promoted Direct and Highly Selective Alkynylation of Electron-Deficient Octafluorotoluene

Cuibo Liu,<sup>a,b</sup> Haitao Zhao,<sup>\*,a</sup> Hui Zhao,<sup>a</sup> Zhifang Wang,<sup>a,b</sup> Bin Zhang<sup>\*,a,b</sup>

<sup>a</sup> Department of Chemistry, School of Science, Tianjin University, Tianjin 300072, P. R. China. Fax&Tel: +86-22-27403475; E-mail: bzhang@tju.edu.cn (B. Z.). htzhao@tju.edu.cn (H. Z.)

<sup>b</sup> Collaborative Innovation Center of Chemical Science and Engineering (Tianjin), Tianjin 300072, P. R. China.

### Table of Contents

|                                                                                                                     |         |
|---------------------------------------------------------------------------------------------------------------------|---------|
| Experimental Section                                                                                                |         |
| .....                                                                                                               | S2      |
| General procedure for direct and highly selective alkynylation of<br>electron-deficient octafluorotoluene <b>1a</b> |         |
| .....                                                                                                               | S3      |
| <b>Further transformations of the products</b>                                                                      |         |
| .....                                                                                                               | S4 – S5 |
| NMR, IR, and HRMS data                                                                                              |         |
| .....                                                                                                               | S6– S50 |
| <b>Computational details</b>                                                                                        |         |
| .....                                                                                                               | S51     |
| Cartesian coordinates for all of the species calculated in this study                                               |         |
| .....                                                                                                               | S52–S54 |

## **Experimental Section:**

### **General information:**

$^1\text{H}$ ,  $^{13}\text{C}$ ,  $^{19}\text{F}$  NMR were recorded on Varian Mercury Plus 400 instruments at 400 MHz ( $^1\text{H}$  NMR), 100 MHz ( $^{13}\text{C}$  NMR), as well as 376 MHz ( $^{19}\text{F}$  NMR). Chemical shifts were reported in ppm down field from internal  $\text{Me}_4\text{Si}$  and external  $\text{CCl}_3\text{F}$ , respectively. Multiplicity was indicated as follows: s (singlet), d (doublet), t (triplet), q (quartet), m (multiplet), dd (doublet of doublet), br (broad). Coupling constants were reported in Hertz (Hz). HRMS were recorded on an Agilent Q-TOF spectrometer using the ESI method and Waters TOF spectrometer using the EI method. IR spectra were recorded on an AVATAR 360 FT-IR spectrometer.

### **Materials:**

Tetrahydrofuran (THF), diethyl ether and toluene were distilled from sodium/benzophenone prior to use; dichloromethane was distilled from  $\text{CaH}_2$ . All purchased reagents were used without further purification. Analytical thin layer chromatography was performed on 0.20 mm Qingdao Haiyang silica gel plates. Silica gel (200-300 mesh) (from Qingdao Haiyang Chem. Company, Ltd.) was used for flash chromatography. Standard reagents and solvents were purified according to known procedures.

**General procedure for alkylation of electron-deficient octafluorotoluene with terminal alkynes**

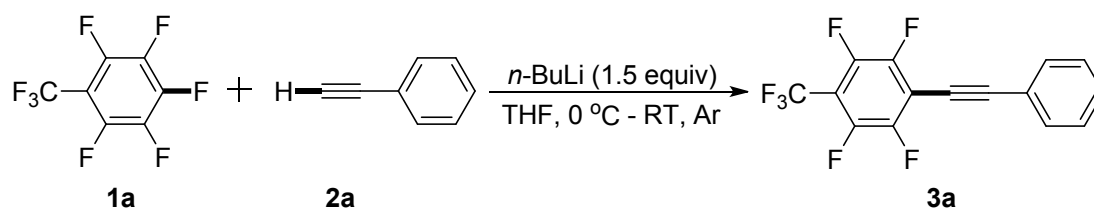

A solution of phenylacetylene **2a** (0.20 mmol, 20.4 mg) in THF (2.0 mL) was added dropwise with  $n\text{-BuLi}$  (2.50 mol/L, 120  $\mu\text{L}$ , 0.30 mmol, 1.5 equiv.) over 5 min at  $0\text{ }^{\circ}\text{C}$  under Ar atmosphere. The resulting suspension was stirred at this temperature for 30 min, and octafluorotoluene **1a** (98%, 0.26 mmol, 72.2 mg, 1.5 equiv.) was added. After stirring at this temperature for 1 h, the reaction mixture was allowed to slowly warm to room temperature and stirred for 36 h. The reaction was quenched with saturated ammonium chloride solution and the organic layers were separated. The aqueous layer was washed twice with diethyl ether and the combined organic layer was washed with brine, dried over  $\text{MgSO}_4$ , filtered, concentrated in vacuo. The residue was purified on silica gel using hexane as solvent to afford the product **3a** (52.8 mg, 83% yield).

### General procedure for the reduction of the product **3a**

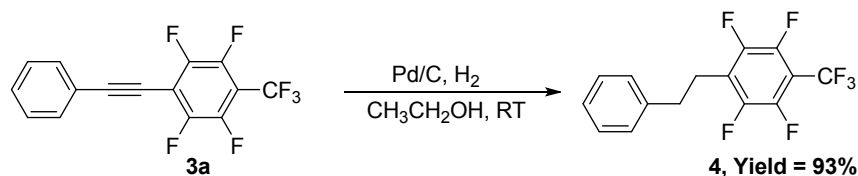

To a solution of **3a** (63.6 mg, 0.2 mmol) in Ethanol (15 mL) was added Pd/C 10% (20 mg). The reaction mixture was stirred under H<sub>2</sub> (1 atm) overnight at room temperature. After the reaction was complete by TLC, the mixture was filtered through a silica gel pad, washed with CH<sub>2</sub>Cl<sub>2</sub>, and the filtrate was concentrated. The residue was purified using chromatography on silica gel to give the hydrogenated product **4** (60.0 mg, 93% yield).

### General procedure for the oxidation of the product **3a**

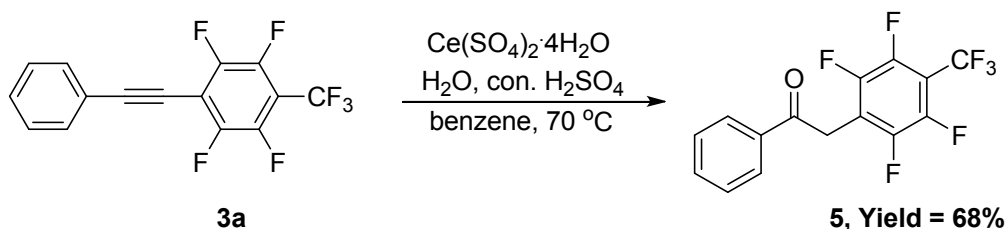

A mixture of **3a** (63.6 mg, 0.2 mmol) and Ce(SO<sub>4</sub>)<sub>2</sub>·4H<sub>2</sub>O (80%, 0.02 mmol, 10 mg) were weighed into a 25-mL one-necked round bottom flask covered with aluminum foil. Then benzene (1.0 mL), H<sub>2</sub>O (4.0 μL) and concentrated H<sub>2</sub>SO<sub>4</sub> (98%, 12 μL) were added to the mixture in order. The reaction flask was immersed in a 70 °C oil bath with stirring under Ar atmosphere for 24 hours. The reaction mixture was extracted with ethyl acetate, dried with anhydrous magnesium sulfate and then concentrated in vacuo. The residue was purified on silica gel to afford the product **5** (45.7 mg, 68% yield).

### The procedure for the synthesis of 1,2-diketone

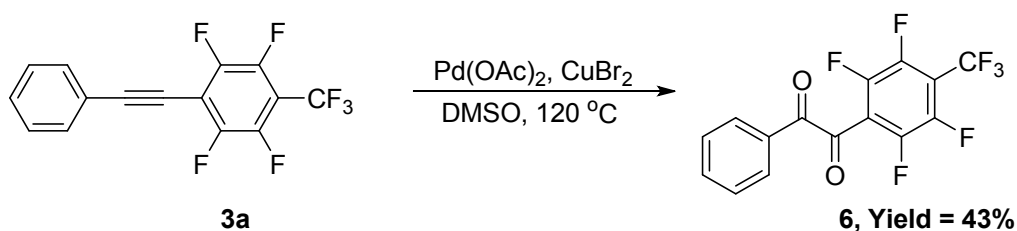

**3a** (63.6 mg, 0.2 mmol), Pd(OAc)<sub>2</sub> (47%, 9.6 mg, 0.02 mmol), and CuBr<sub>2</sub> (4.5 mg, 0.02mmol) were weighed into a 25-mL flask, then DMSO (2.0 mL) was added under air atmosphere. The reaction mixture was heated in an oil bath at 120 °C for 20 h. After the reaction was complete, 10 mL water was added and the mixture was extracted with ethyl acetate. The combined organic phases were dried over anhydrous Na<sub>2</sub>SO<sub>4</sub> and filtered. The solvent was removed under reduced pressure. The residue was purified by column chromatography to afford the pure product **6** (30.1 mg, 43% yield).

#### The procedure for the demethylation of **3I**

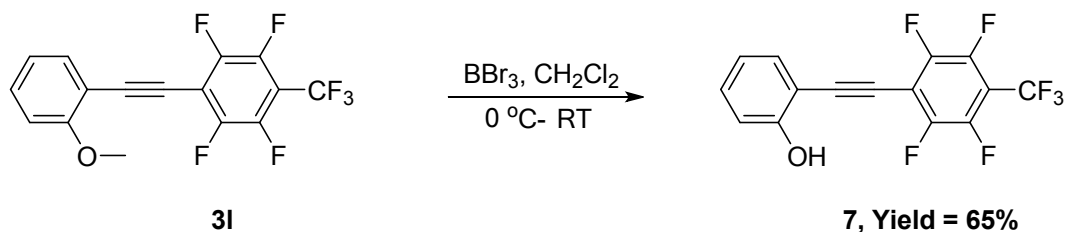

**3I** (69.6 mg, 0.2 mmol) was weighed into an oven-dried 25-mL flask, then anhydrous CH<sub>2</sub>Cl<sub>2</sub> (5.0 mL) was added under Ar. The flask was cooled in an ice bath at 0 °C for 0.5 h and then BBr<sub>3</sub> (99%, 75.9 mg, 0.3 mmol) was added in dropwise via syringe. After the addition of BBr<sub>3</sub> was finished, the reaction mixture was allowed to slowly warm to room temperature and stirred for 24 h, 10 mL water was added and the mixture was extracted with CH<sub>2</sub>Cl<sub>2</sub>. The combined organic phases were dried over anhydrous Na<sub>2</sub>SO<sub>4</sub> and filtered. The solvent was removed under reduced pressure. The residue was purified by column chromatography to afford the pure product **7** (43.4 mg, 65% yield).

## NMR, IR, and HRMS data

### 1,2,4,5-tetrafluoro-3-(phenylethynyl)-6-(trifluoromethyl)benzene

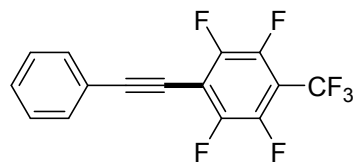

**3a**

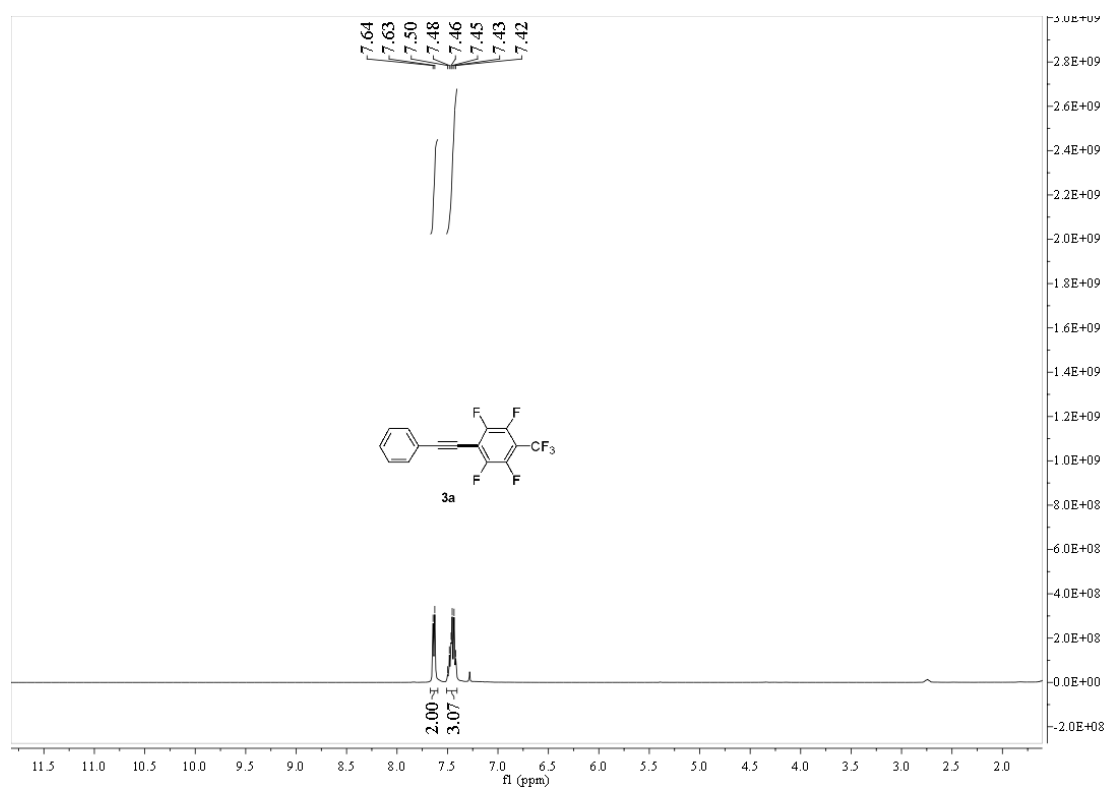

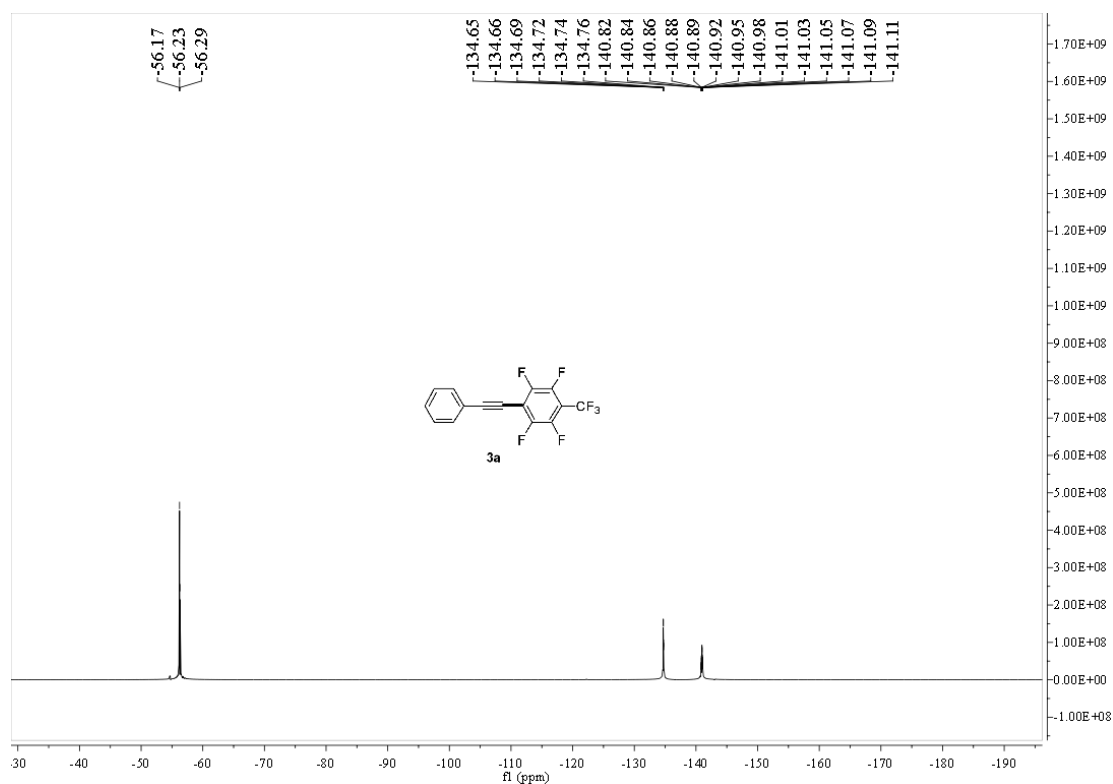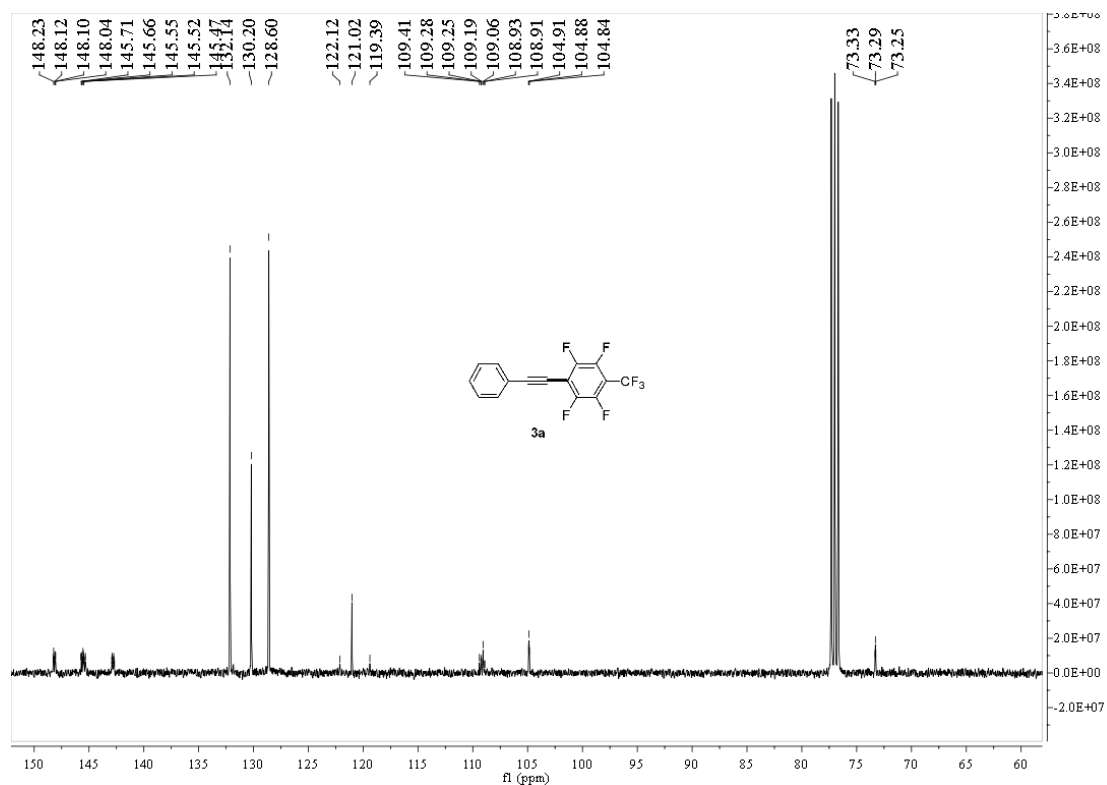

**<sup>1</sup>H NMR** (400 MHz, CDCl<sub>3</sub>) [ppm] δ 7.63 (d, *J* = 6.9 Hz, 2H), 7.51 – 7.41 (m, 3H); **<sup>19</sup>F NMR** (376 MHz, CDCl<sub>3</sub>) [ppm] δ -56.2 (t, *J* = 22.6 Hz, 3F), -134.6 to -134.7 (m, 2F), -140.9 to -141.0 (m, 2F); **<sup>13</sup>C NMR** (100 MHz, CDCl<sub>3</sub>) [ppm] δ 73.3 (t, *J* = 4.0 Hz), 104.9 (t, *J* = 3.5 Hz), 108.9 – 109.4 (m), 120.8 (q, <sup>1</sup>*J*<sub>CF</sub> = 274.0 Hz), 121.0, 128.6,

130.2, 132.1, 142.7 – 142.9 (m), 145.3 – 145.7 (m), 148.0 – 148.3 (m); **IR** (KBr)  $\nu$  (cm<sup>-1</sup>): 2221, 1484, 1401, 1346, 1271, 1174, 1136, 1072, 981, 873, 760, 690, 529; **HRMS** (EI) found: m/z 318.0269 [M]; calcd. for C<sub>15</sub>H<sub>5</sub>F<sub>7</sub> 318.0279.

**1,2,4,5-tetrafluoro-3-(p-tolylethynyl)-6-(trifluoromethyl)benzene**

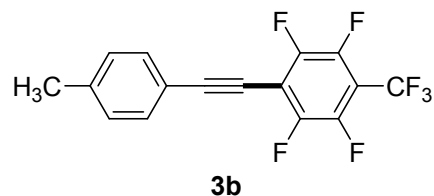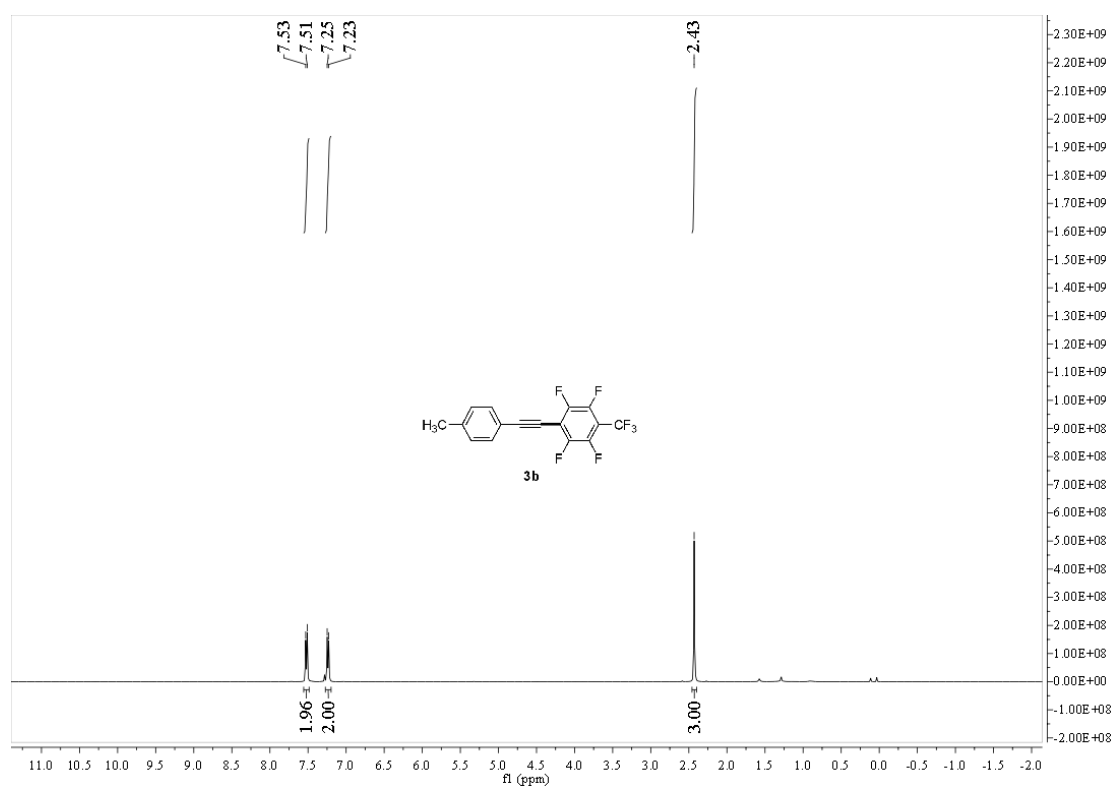



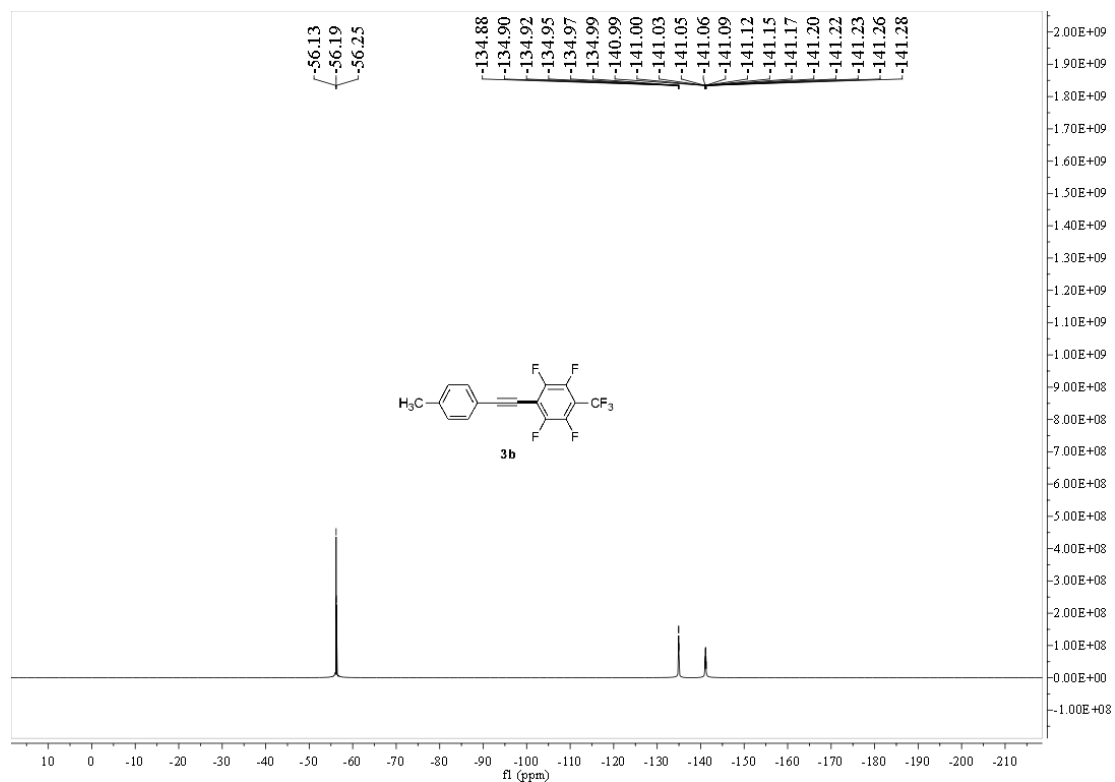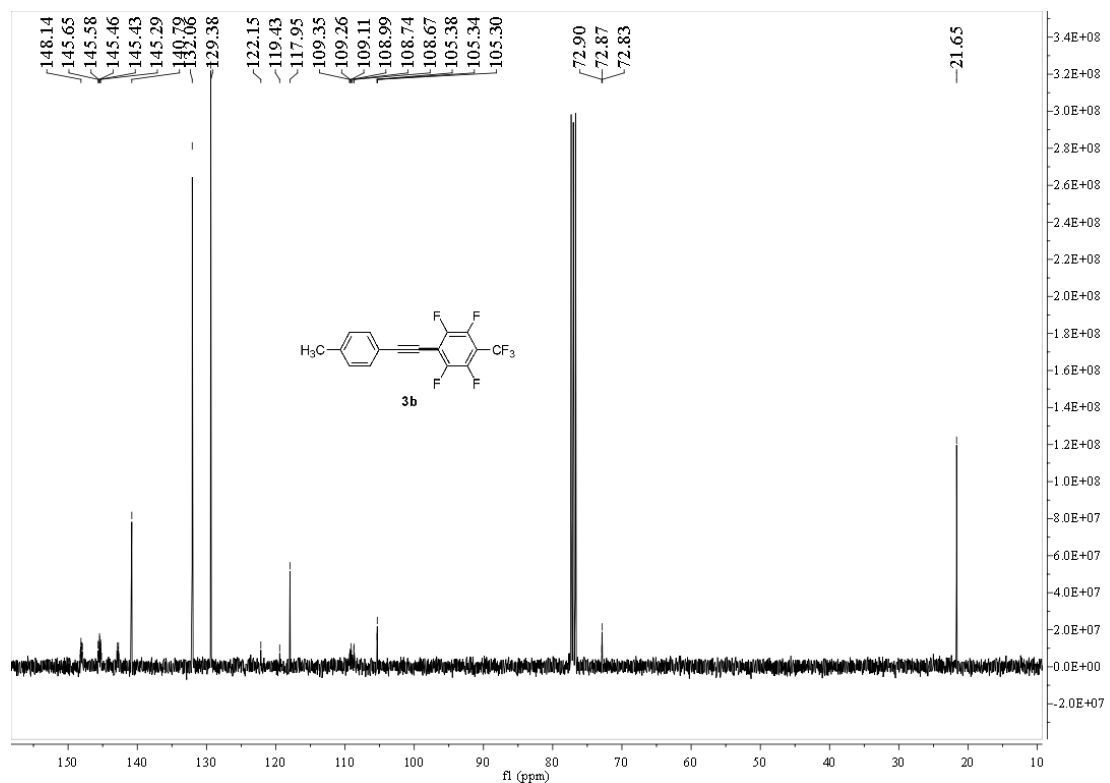

**<sup>1</sup>H NMR** (400 MHz, CDCl<sub>3</sub>) [ppm] δ 7.52 (d, *J* = 8.0 Hz, 2H), 7.24 (d, *J* = 7.8 Hz, 2H), 2.43 (s, 3H); **<sup>19</sup>F NMR** (376 MHz, CDCl<sub>3</sub>) [ppm] δ -56.2 (t, *J* = 22.6 Hz, 3F), -134.9 to -135.0 (m, 2F), -141.0 to -141.3 (m, 2F); **<sup>13</sup>C NMR** (100 MHz, CDCl<sub>3</sub>) [ppm] δ 21.7, 72.9 (t, *J* = 3.5 Hz), 105.3 (t, *J* = 4.0 Hz), 108.7 – 109.4 (m), 118.0, 120.8 (q,

$^1J_{CF} = 272.0$  Hz), 129.4, 132.1, 140.8, 142.7 – 143.0 (m), 145.2 – 145.7 (m), 148.0 – 148.3 (m); **IR** (KBr)  $\nu$  ( $\text{cm}^{-1}$ ): 2925, 2221, 1650, 1594, 1486, 1341, 1272, 1190, 1141, 984, 872, 819, 709, 530; **HRMS** (EI) found:  $m/z$  332.0432 [M]; calcd. for  $\text{C}_{16}\text{H}_7\text{F}_7$  332.0436.

**1-((4-ethylphenyl)ethynyl)-2,3,5,6-tetrafluoro-4-(trifluoromethyl)benzene**

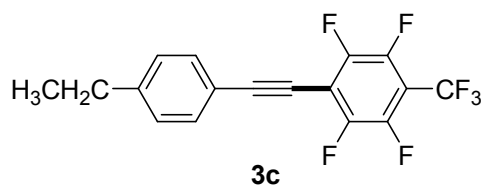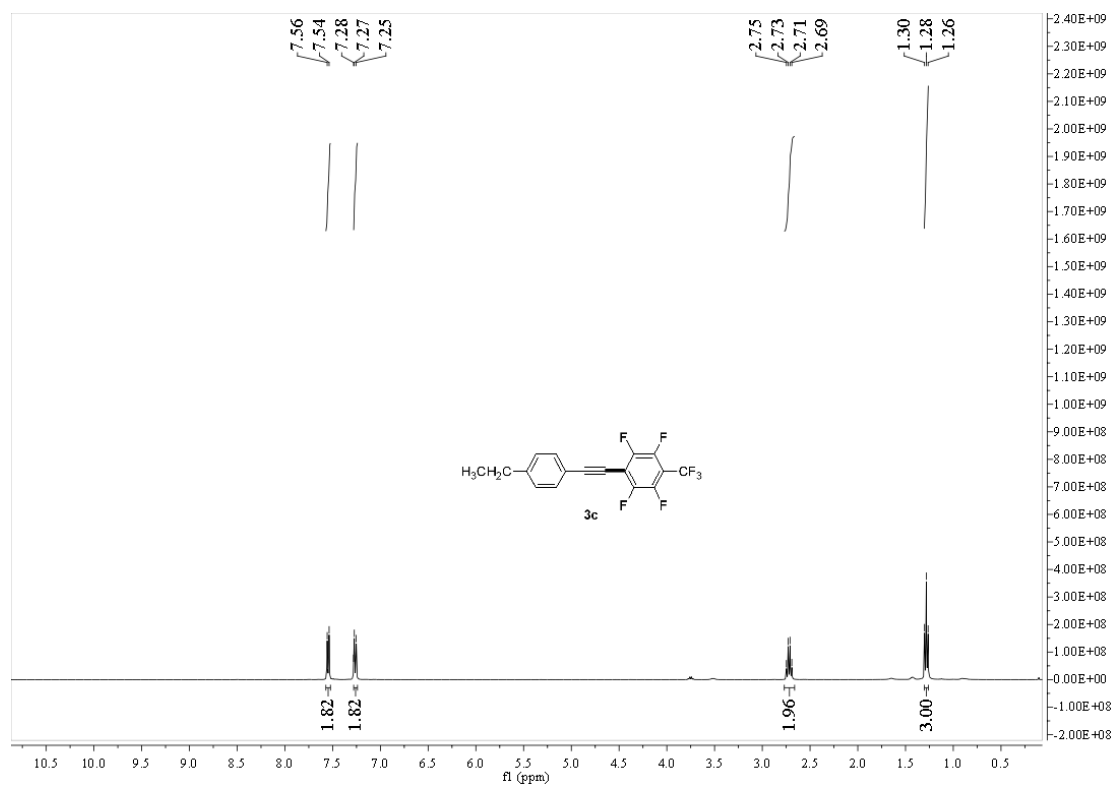

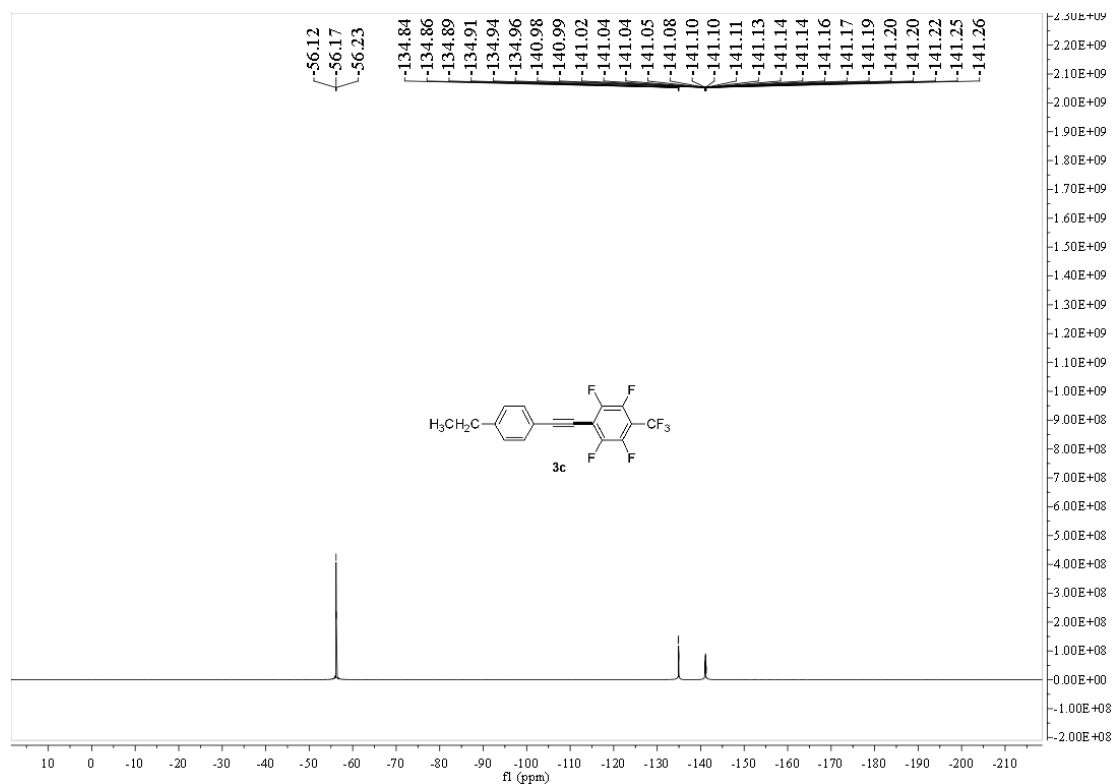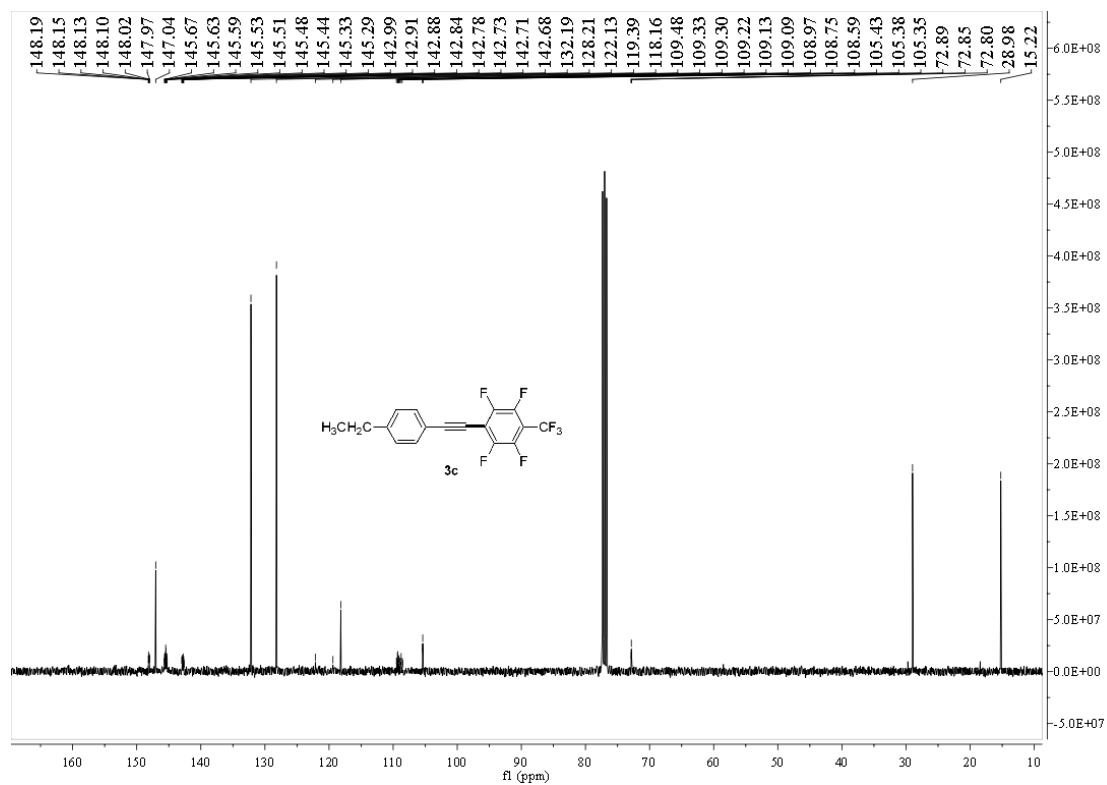

**<sup>1</sup>H NMR** (400 MHz, CDCl<sub>3</sub>) [ppm] δ 7.55 (d, *J* = 8.1 Hz, 2H), 7.26 (d, *J* = 8.1 Hz, 2H), 2.72 (q, *J* = 7.6 Hz, 2H), 1.28 (t, *J* = 7.6 Hz, 3H); **<sup>19</sup>F NMR** (376 MHz, CDCl<sub>3</sub>) [ppm] δ -56.2 (t, *J* = 22.6 Hz, 3F), -134.9 to -135.0 (m, 2F), -141.0 to -141.3 (m, 2F); **<sup>13</sup>C NMR** (100 MHz, CDCl<sub>3</sub>) [ppm] δ 15.2, 29.0, 72.9 (t, *J* = 4.5 Hz), 105.4 (t, *J* = 4.0 Hz),

108.5 – 109.5 (m), 118.2, 128.2, 120.8 (q,  $^1J_{CF} = 274.0$  Hz), 132.2, 142.6 – 143.0 (m), 145.2 – 145.7 (m), 147.0, 148.0 – 148.2 (m); **IR** (KBr)  $\nu$  (cm<sup>-1</sup>): 2972, 2936, 2876, 2226, 1648, 1603, 1491, 1341, 1271, 1147, 988, 873, 837, 712, 687, 561, 528; **HRMS** (EI) found: m/z 346.0589 [M]; calcd. for C<sub>17</sub>H<sub>9</sub>F<sub>7</sub> 346.0592.

**1,2,4,5-tetrafluoro-3-((4-propylphenyl)ethynyl)-6-(trifluoromethyl)benzene**

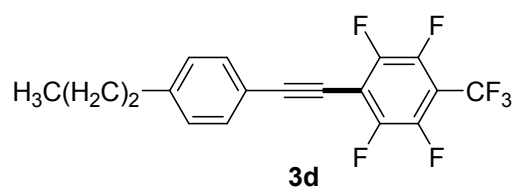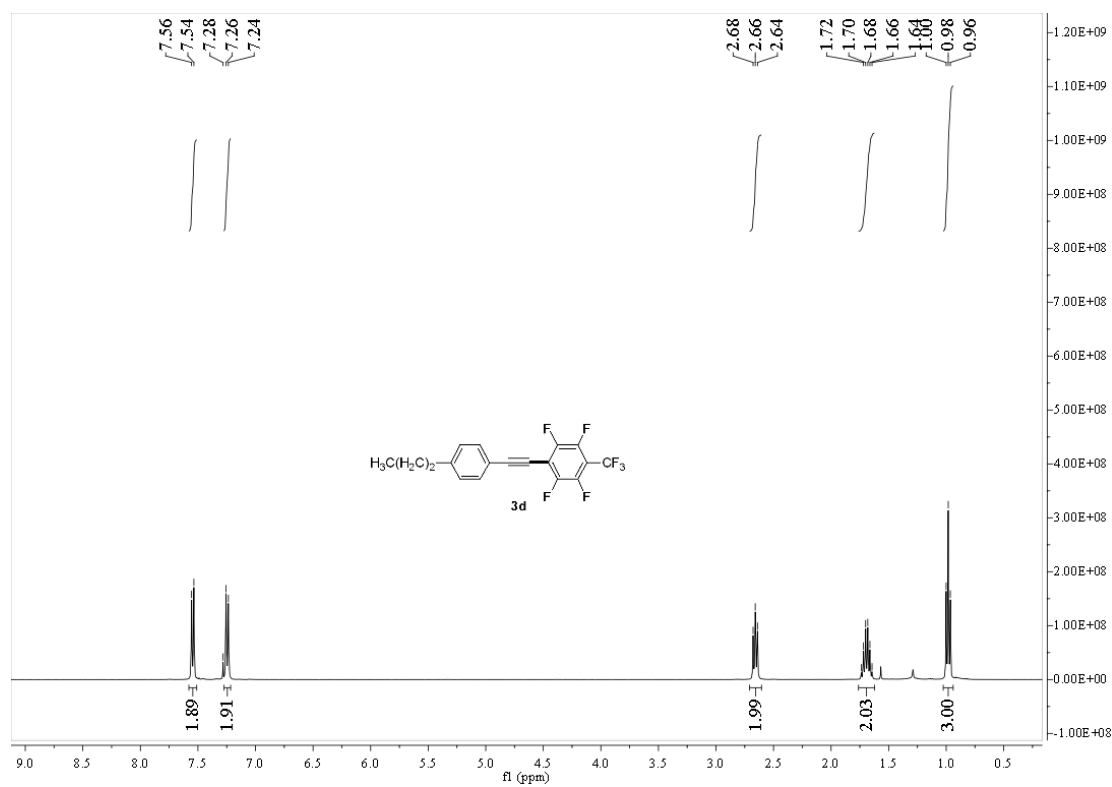

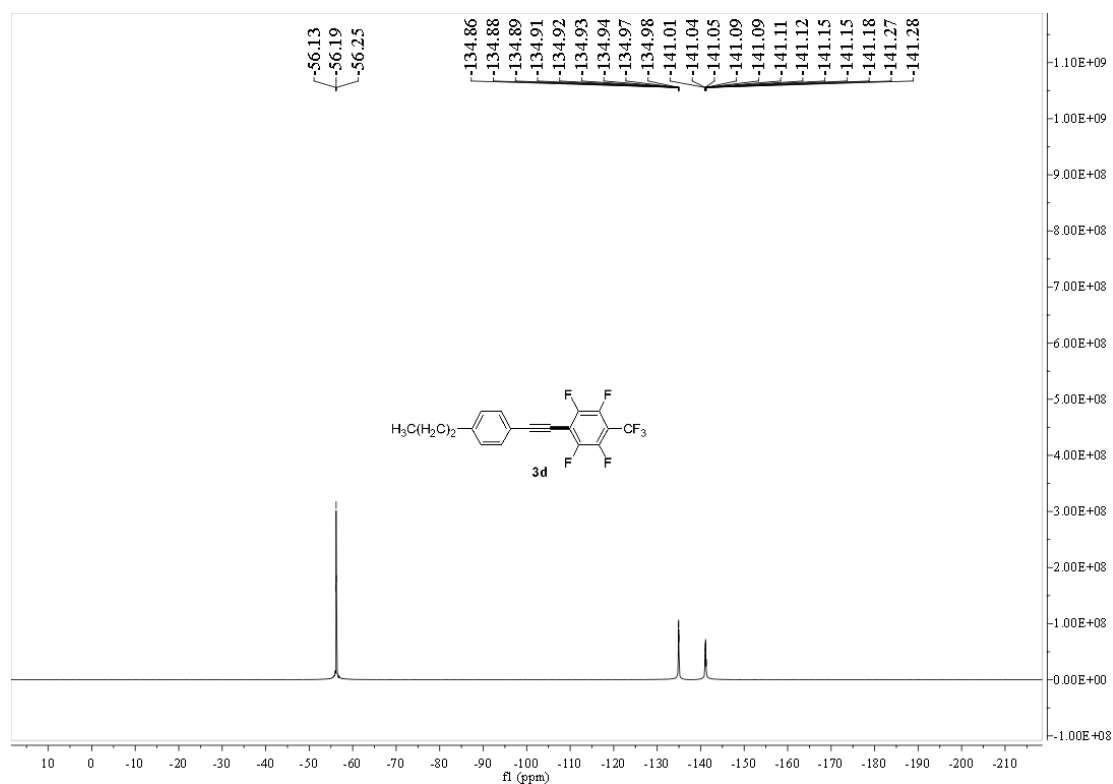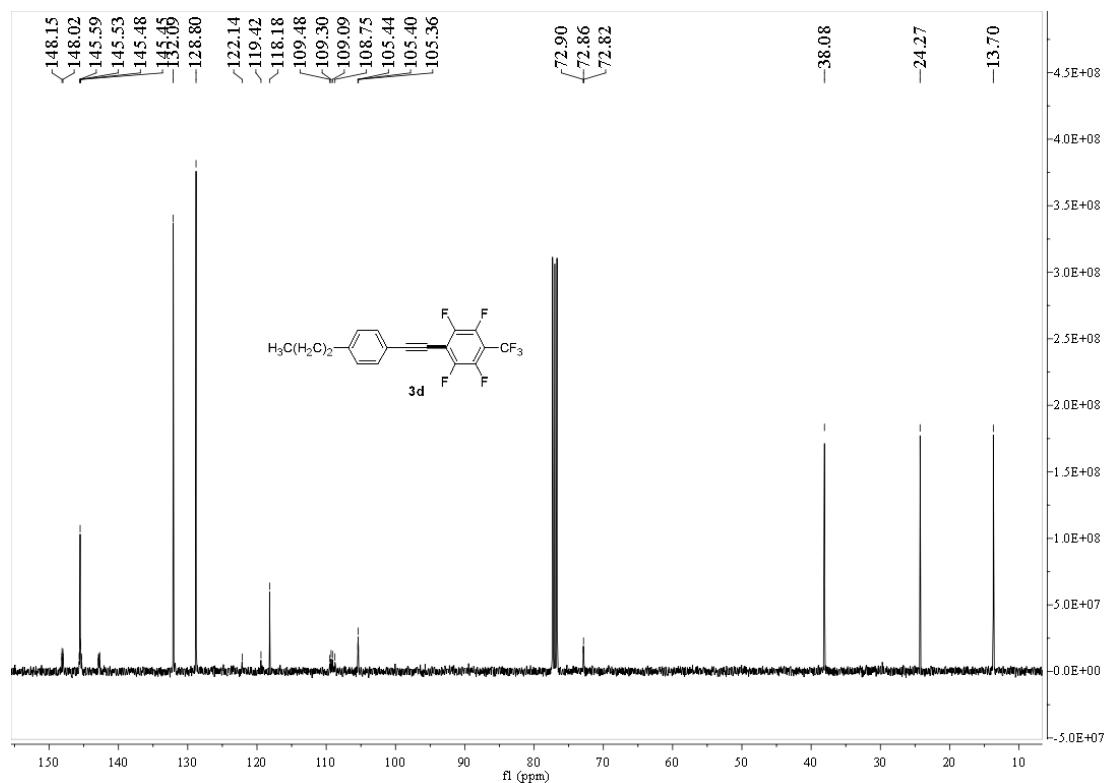

**<sup>1</sup>H NMR** (400 MHz, CDCl<sub>3</sub>) [ppm] δ 7.55 (d, *J* = 8.1 Hz, 2H), 7.25 (d, *J* = 8.1 Hz, 2H), 2.71 – 2.60 (m, 2H), 1.76 – 1.62 (m, 2H), 0.98 (t, *J* = 7.3 Hz, 3H); **<sup>19</sup>F NMR** (376 MHz, CDCl<sub>3</sub>) [ppm] δ -56.2 (t, *J* = 22.6 Hz, 3F), -134.9 to -135.0 (m, 2F), -141.0 to -141.3 (m, 2F); **<sup>13</sup>C NMR** (100 MHz, CDCl<sub>3</sub>) [ppm] δ 13.7, 24.3, 38.1, 72.9 (t, *J* = 4.0

Hz), 105.4 (t,  $J = 4.0$  Hz), 108.5 – 109.5 (m), 118.2, 120.8 (q,  $^1J_{CF} = 272.0$  Hz), 128.8, 132.1, 142.7 – 142.9 (m), 145.5, 145.3 – 145.7 (m), 148.0 – 148.2 (m); **IR** (KBr)  $\nu$  ( $\text{cm}^{-1}$ ): 2964, 2931, 2870, 2218, 1650, 1595, 1490, 1341, 1273, 1180, 1150, 1025, 987, 873, 812, 712, 570, 535; **HRMS** (EI) found:  $m/z$  360.0742 [M]; calcd. for  $\text{C}_{18}\text{H}_{11}\text{F}_7$  360.0749.

**1-((4-butylphenyl)ethynyl)-2,3,5,6-tetrafluoro-4-(trifluoromethyl)benzene**

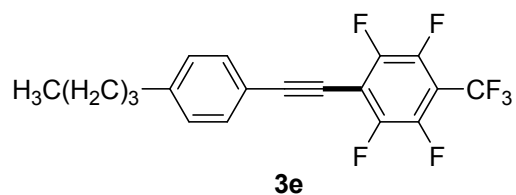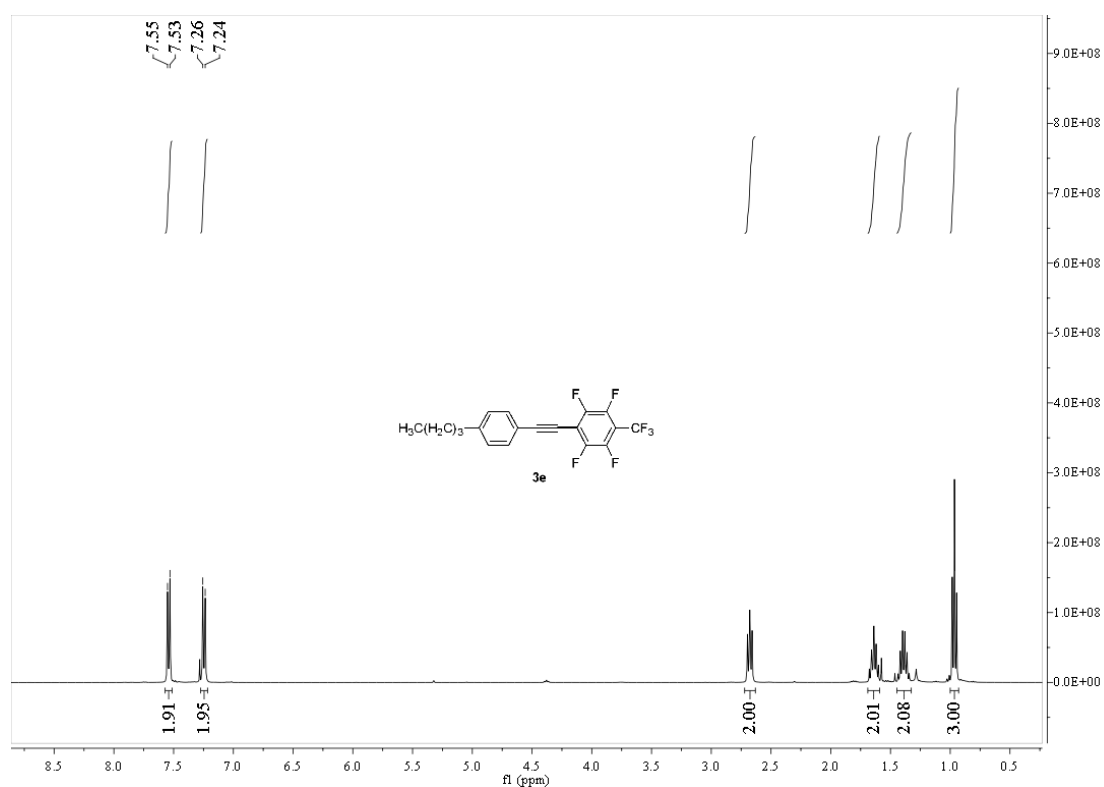

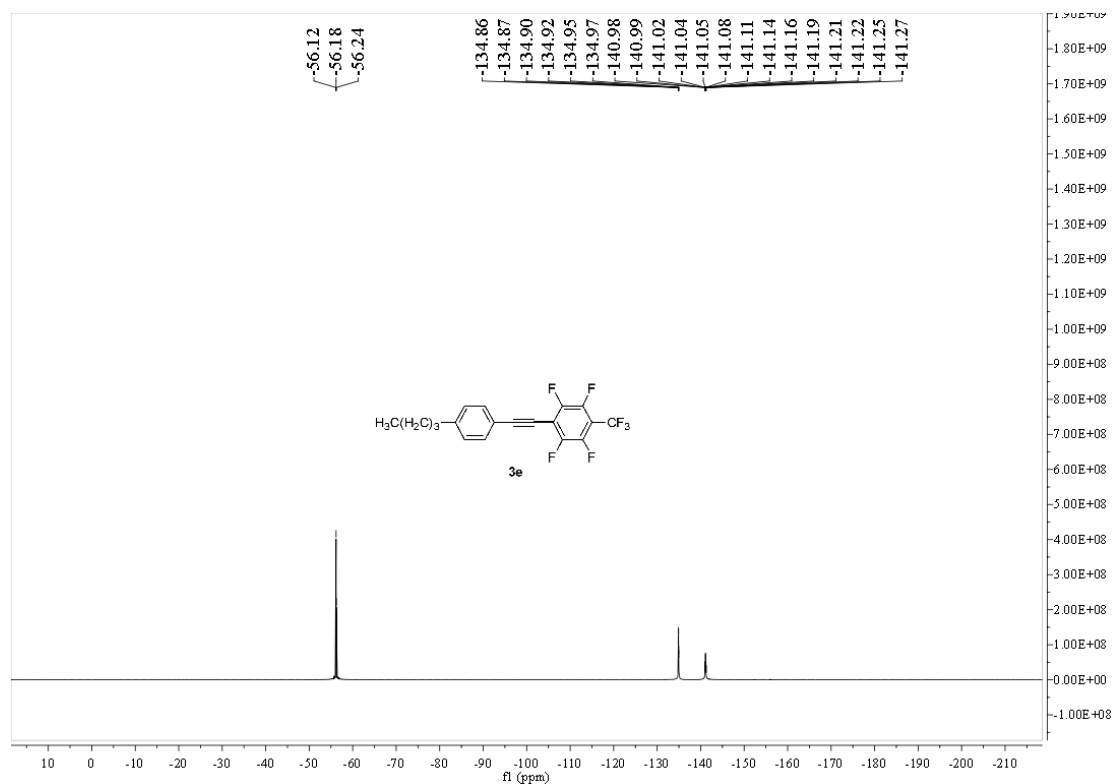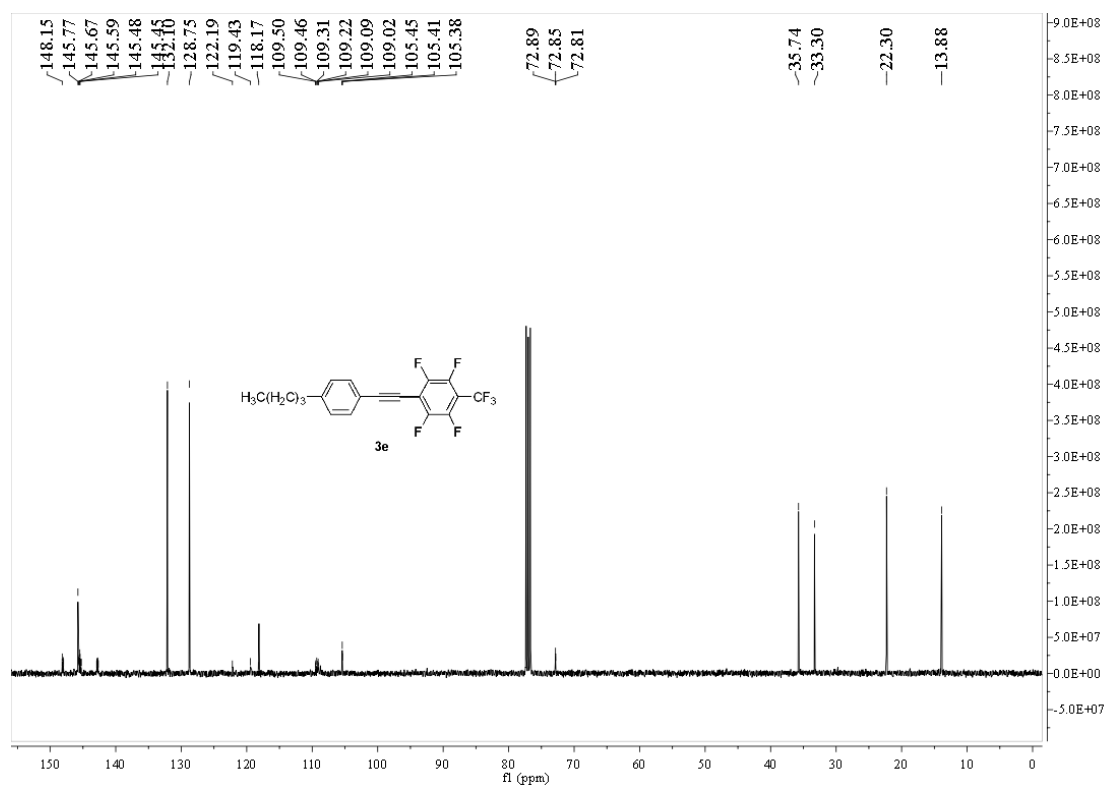

**<sup>1</sup>H NMR** (400 MHz, CDCl<sub>3</sub>) [ppm]  $\delta$  7.54 (d,  $J$  = 8.1 Hz, 2H), 7.25 (d,  $J$  = 8.1 Hz, 2H), 2.72 – 2.63 (m, 2H), 1.69 – 1.59 (m, 2H), 1.45 – 1.33 (m, 2H), 0.96 (t,  $J$  = 7.3 Hz, 3H); **<sup>19</sup>F NMR** (376 MHz, CDCl<sub>3</sub>) [ppm]  $\delta$  -56.2 (t,  $J$  = 22.6 Hz, 3F), -134.9 to -135.0 (m, 2F), -141.0 to -141.3 (m, 2F); **<sup>13</sup>C NMR** (100 MHz, CDCl<sub>3</sub>) [ppm]  $\delta$  13.9, 22.3,

33.3, 35.7, 72.9 (t,  $J = 4.0$  Hz), 105.4 (t,  $J = 3.5$  Hz), 109.0 – 109.5 (m), 118.2, 120.8 (q,  $^1J_{CF} = 276.0$  Hz), 128.8, 132.1, 142.7 – 142.9 (m), 145.3 – 145.7 (m), 145.8, 148.0 – 148.2 (m); **IR** (KBr)  $\nu$  ( $\text{cm}^{-1}$ ): 2963, 2934, 2865, 2222, 1654, 1601, 1490, 1345, 1274, 1230, 1159, 988, 876, 832, 744, 713, 570, 536; **HRMS** (EI) found:  $m/z$  374.0895 [M]; calcd. for  $\text{C}_{19}\text{H}_{13}\text{F}_7$  374.0905.

**1,2,4,5-tetrafluoro-3-((4-pentylphenyl)ethynyl)-6-(trifluoromethyl)benzene**

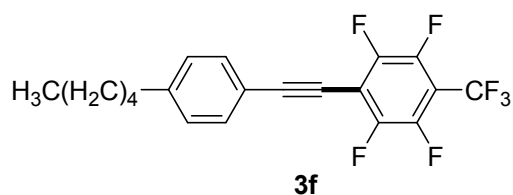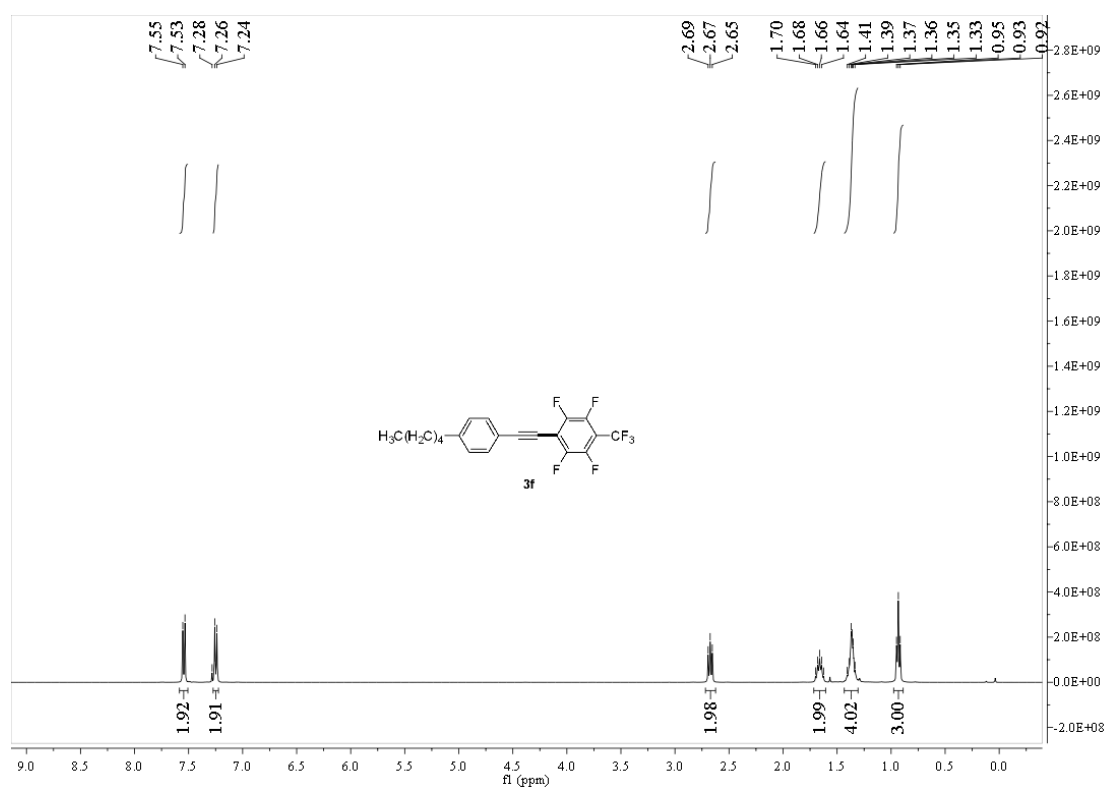



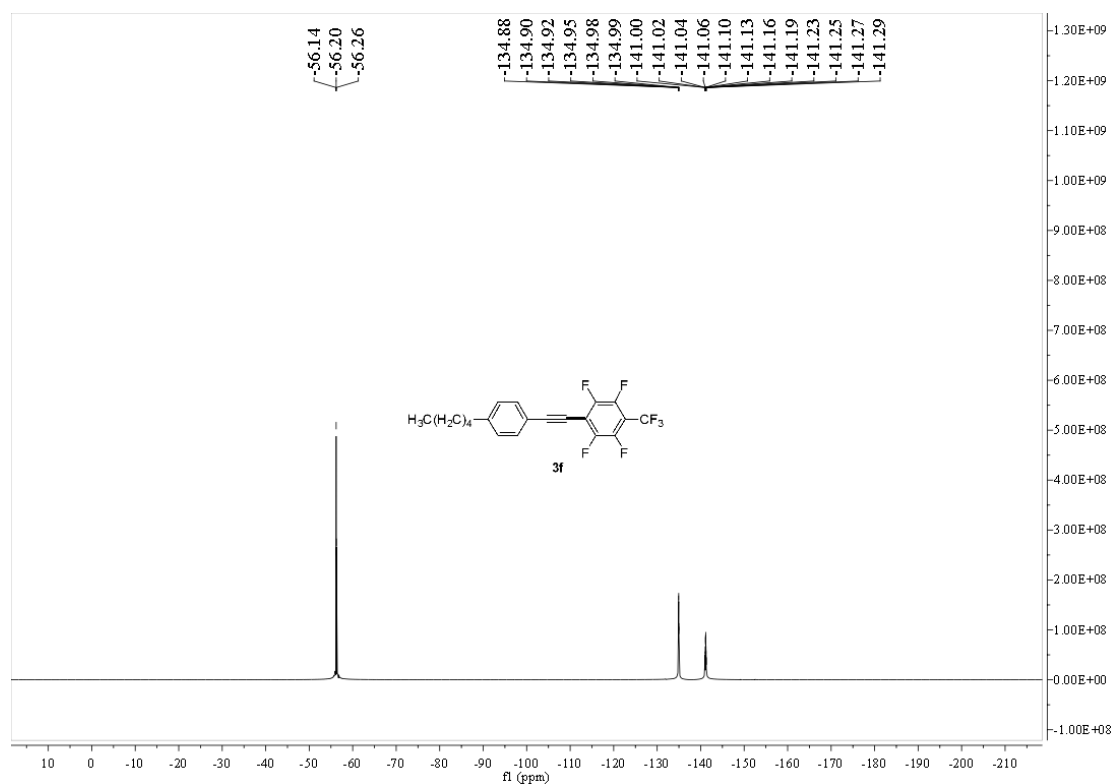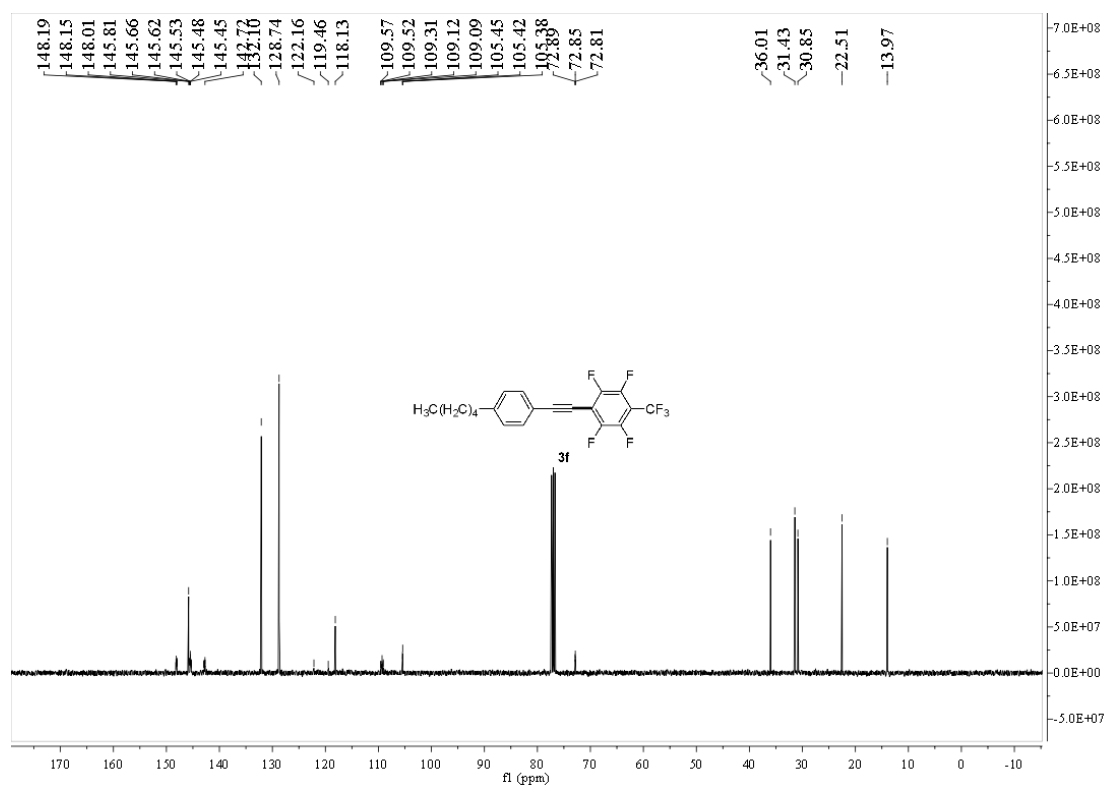

**<sup>1</sup>H NMR** (400 MHz, CDCl<sub>3</sub>) [ppm] δ 7.54 (d, *J* = 8.1 Hz, 2H), 7.25 (d, *J* = 8.1 Hz, 2H), 2.72 – 2.62 (m, 2H), 1.72 – 1.61 (m, 2H), 1.43 – 1.31 (m, 4H), 0.93 (t, *J* = 6.8 Hz, 3H); **<sup>19</sup>F NMR** (376 MHz, CDCl<sub>3</sub>) [ppm] δ -56.2 (t, *J* = 22.6 Hz, 3F), -134.9 to -135.0 (m, 2F), -141.0 to -141.3 (m, 2F); **<sup>13</sup>C NMR** (100 MHz, CDCl<sub>3</sub>) [ppm] δ 14.0, 22.5,

30.9, 31.4, 36.0, 72.9 (t,  $J = 4.0$  Hz), 105.4 (t,  $J = 3.5$  Hz), 109.1 – 109.6 (m), 118.1, 120.8 (q,  $^1J_{CF} = 270.0$  Hz), 128.7, 132.1, 142.7 – 142.9 (m), 145.3 – 145.7 (m), 145.8, 148.0 – 148.2 (m); **IR** (KBr)  $\nu$  ( $\text{cm}^{-1}$ ): 2931, 2860, 2224, 1654, 1600, 1489, 1344, 1274, 1179, 1146, 985, 872, 853, 812, 741, 711, 569, 531; **HRMS** (EI) found:  $m/z$  388.1068 [M]; calcd. for  $\text{C}_{20}\text{H}_{15}\text{F}_7$  388.1062.

**1,2,4,5-tetrafluoro-3-((4-methoxyphenyl)ethynyl)-6-(trifluoromethyl)benzene**

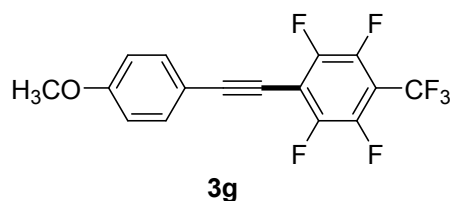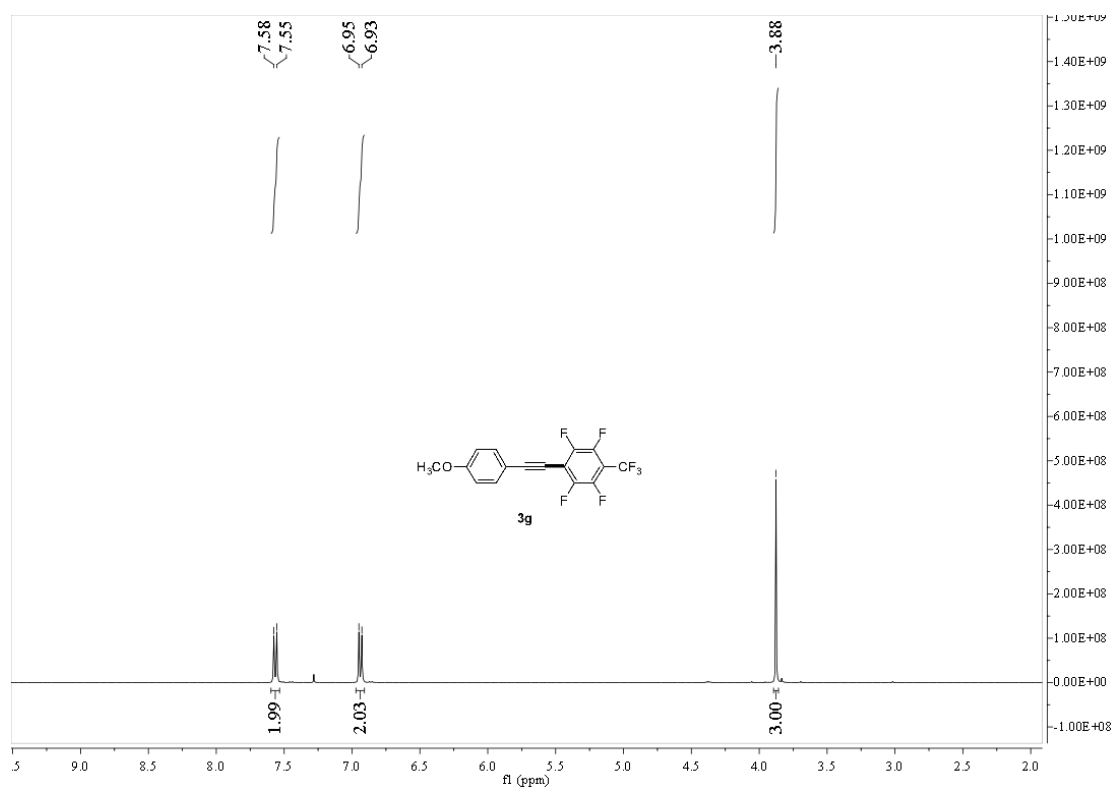

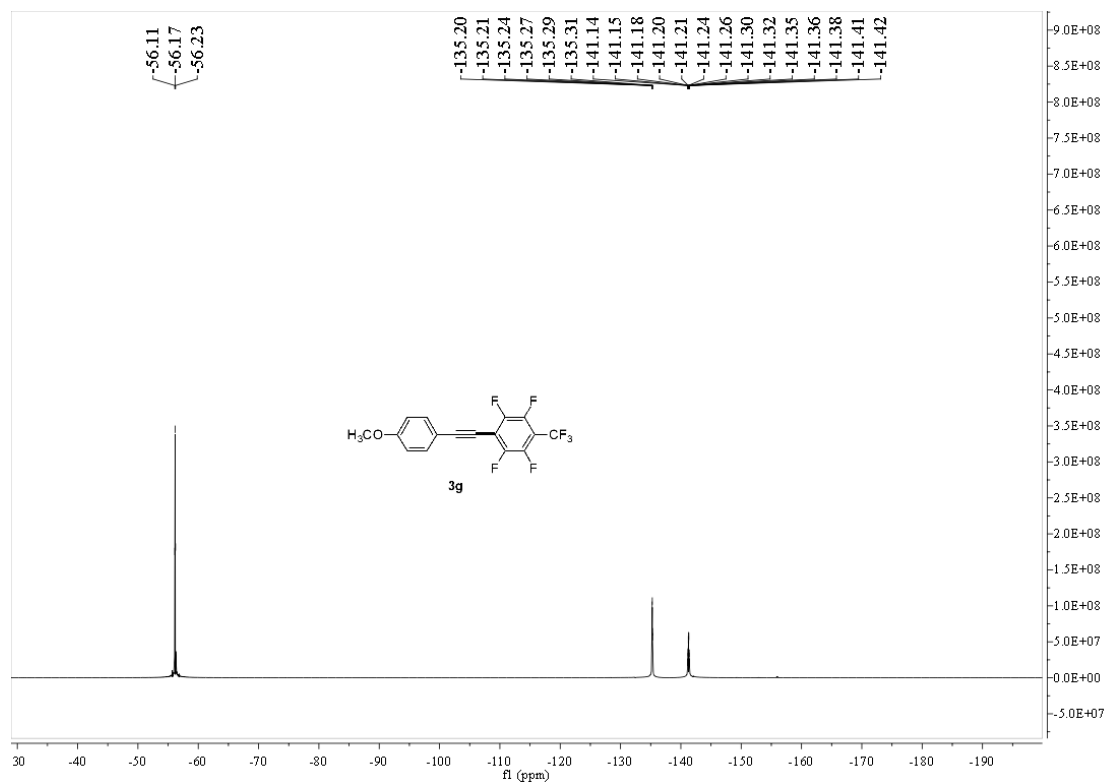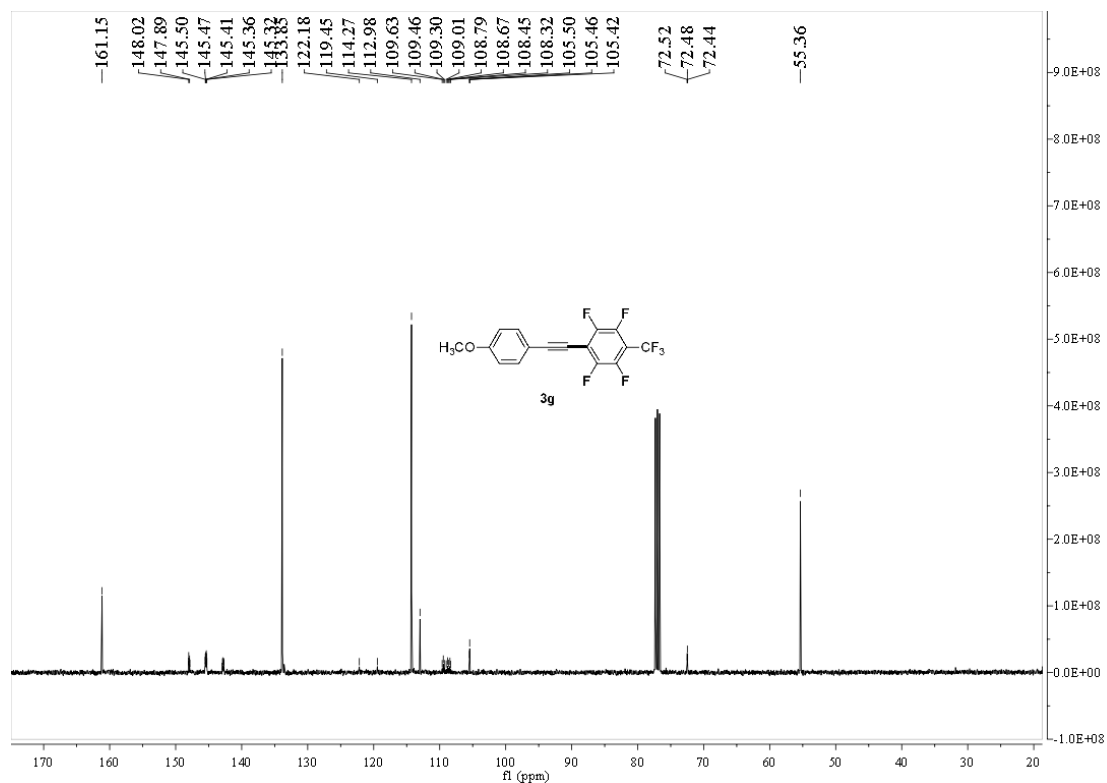

**<sup>1</sup>H NMR** (400 MHz, CDCl<sub>3</sub>) [ppm] δ 7.57 (d, *J* = 8.8 Hz, 2H), 6.94 (d, *J* = 8.8 Hz, 2H), 3.88 (s, 3H); **<sup>19</sup>F NMR** (376 MHz, CDCl<sub>3</sub>) [ppm] δ -56.2 (t, *J* = 22.6 Hz, 3F), -135.2 to -135.3 (m, 2F), -141.1 to -141.4 (m, 2F); **<sup>13</sup>C NMR** (100 MHz, CDCl<sub>3</sub>) [ppm] δ 55.4, 72.5 (t, *J* = 4.0 Hz), 105.5 (t, *J* = 4.0 Hz), 108.3 – 109.6 (m), 113.0, 114.3,

120.8 (q,  $^1J_{CF} = 273.0$  Hz), 133.9, 142.7 – 143.0 (m), 145.3 – 145.5 (m), 147.8 – 148.1 (m), 161.2; **IR** (KBr)  $\nu$  (cm<sup>-1</sup>): 2959, 2847, 2219, 1654, 1602, 1486, 1345, 1264, 1152, 1106, 1028, 984, 874, 830, 741, 536; **HRMS** (EI) found:  $m/z$  348.0378 [M]; calcd. for C<sub>16</sub>H<sub>7</sub>F<sub>7</sub>O 348.0385.

**1-((4-chlorophenyl)ethynyl)-2,3,5,6-tetrafluoro-4-(trifluoromethyl)benzene**

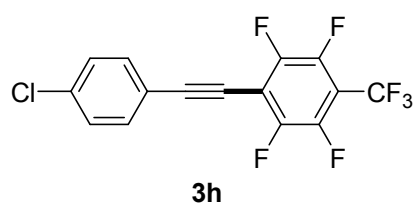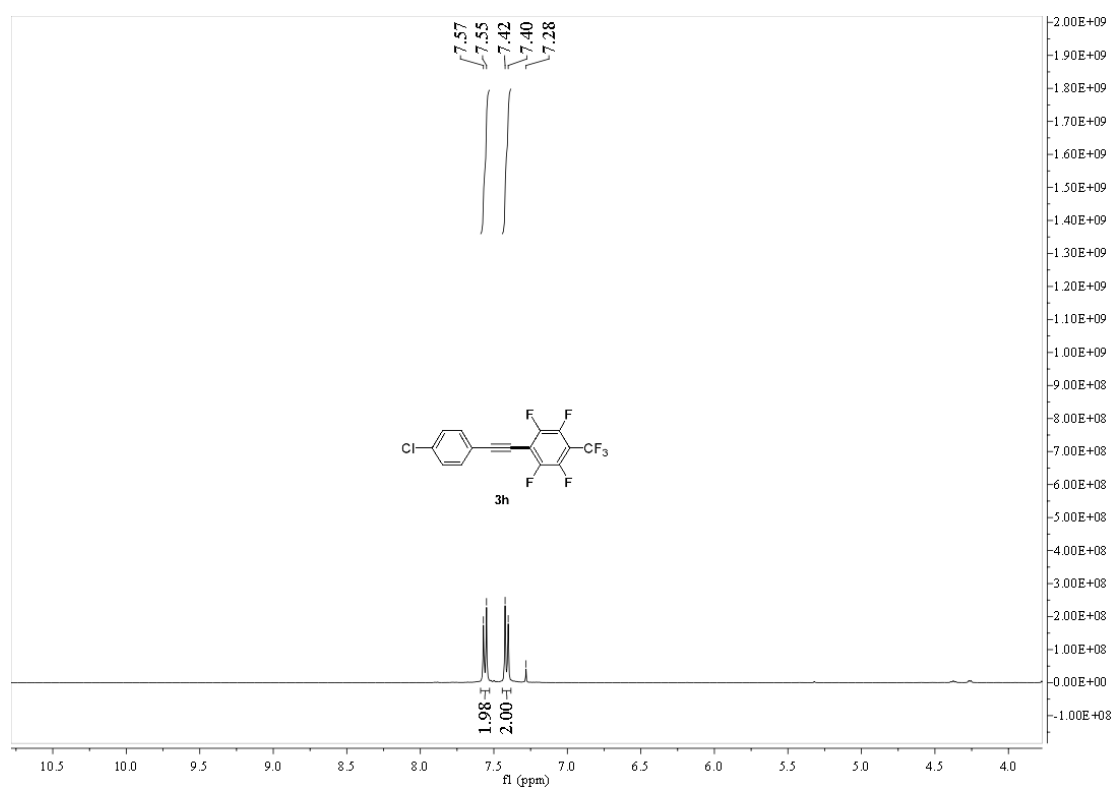

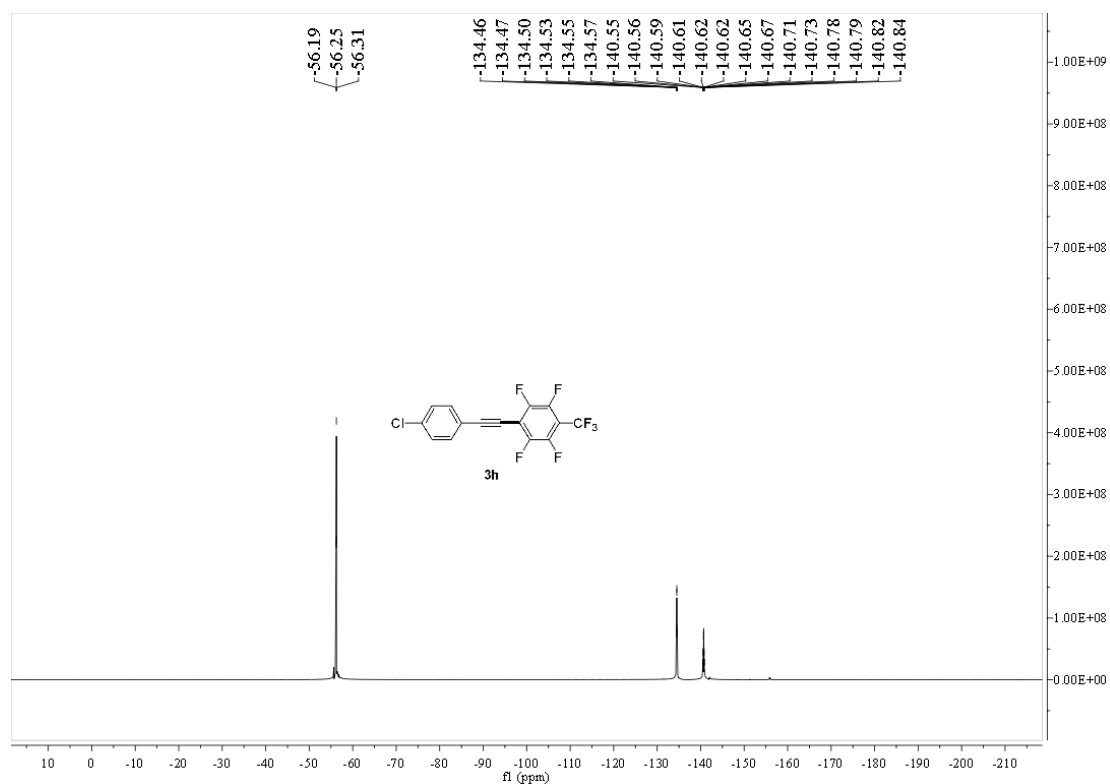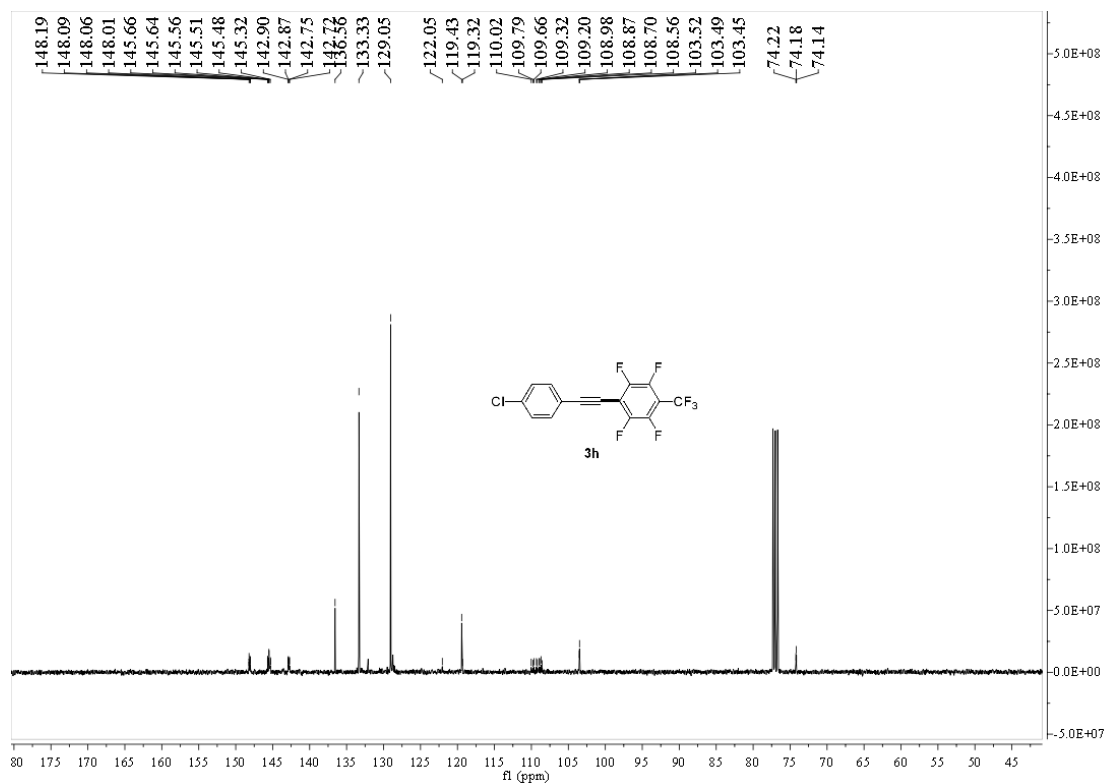

**<sup>1</sup>H NMR** (400 MHz, CDCl<sub>3</sub>) [ppm] δ 7.56 (d, *J* = 8.5 Hz, 2H), 7.41 (d, *J* = 8.5 Hz, 2H);  
**<sup>19</sup>F NMR** (376 MHz, CDCl<sub>3</sub>) [ppm] δ -56.3 (t, *J* = 22.6 Hz, 3F), -134.5 to -134.6 (m, 2F), -140.6 to -140.8 (m, 2F);  
**<sup>13</sup>C NMR** (100 MHz, CDCl<sub>3</sub>) [ppm] δ 74.2 (t, *J* = 4.0 Hz), 103.5 (t, *J* = 3.5 Hz), 108.7 – 110.0 (m), 119.4, 120.7 (q, <sup>1</sup>*J*<sub>CF</sub> = 273.0 Hz),

129.1, 133.3, 136.6, 142.7 – 142.9 (m), 145.3 – 145.7 (m), 148.0 – 148.2 (m); **IR** (KBr)  $\nu$  (cm<sup>-1</sup>): 2226, 1763, 1651, 1595, 1486, 1403, 1343, 1272, 1188, 1142, 1092, 984, 873, 826, 744, 711, 524; **HRMS** (EI) found:  $m/z$  351.9890 [M]; calcd. for C<sub>15</sub>H<sub>4</sub>ClF<sub>7</sub> 351.9890.

**1,2,4,5-tetrafluoro-3-((3-methoxyphenyl)ethynyl)-6-(trifluoromethyl)benzene**

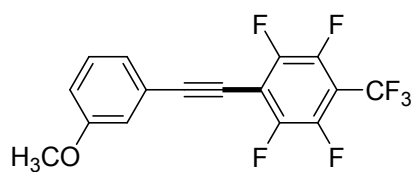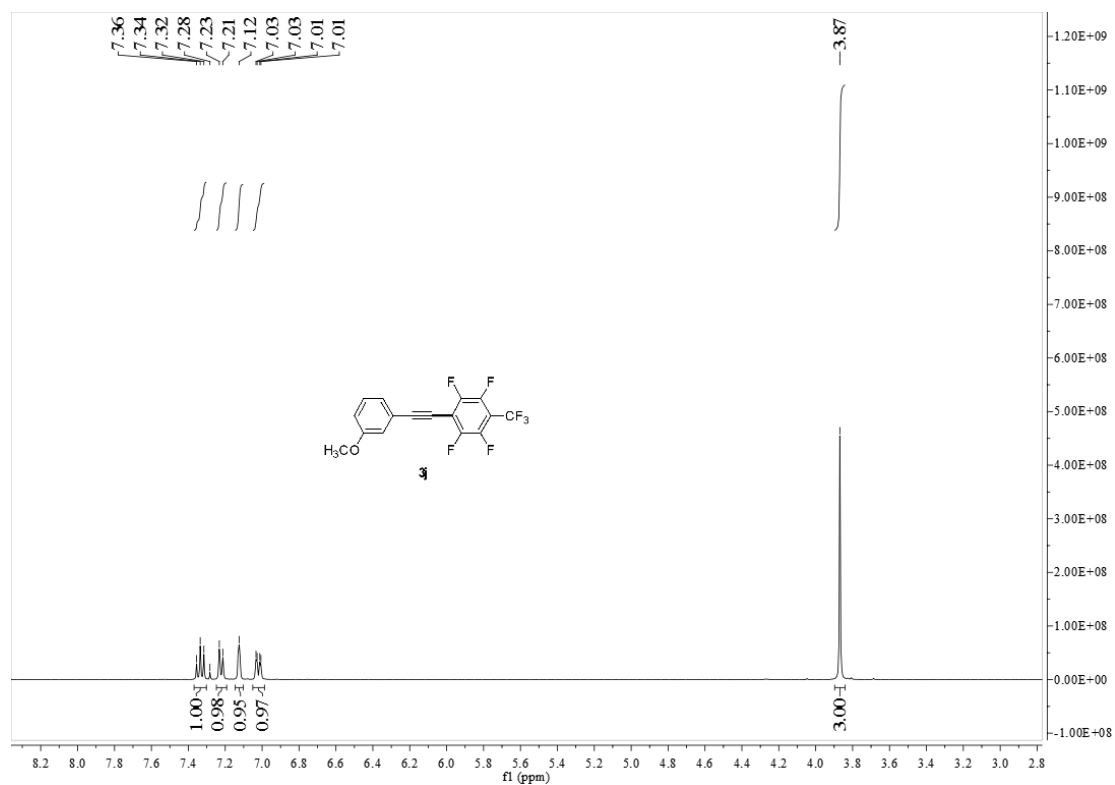

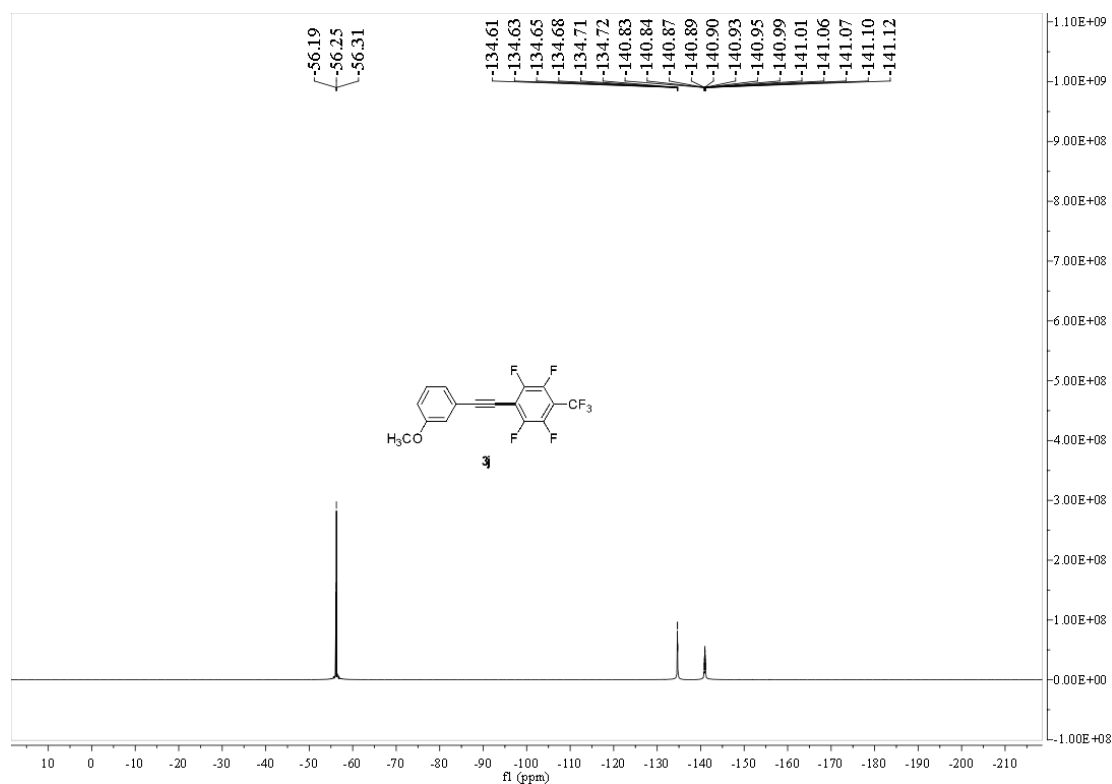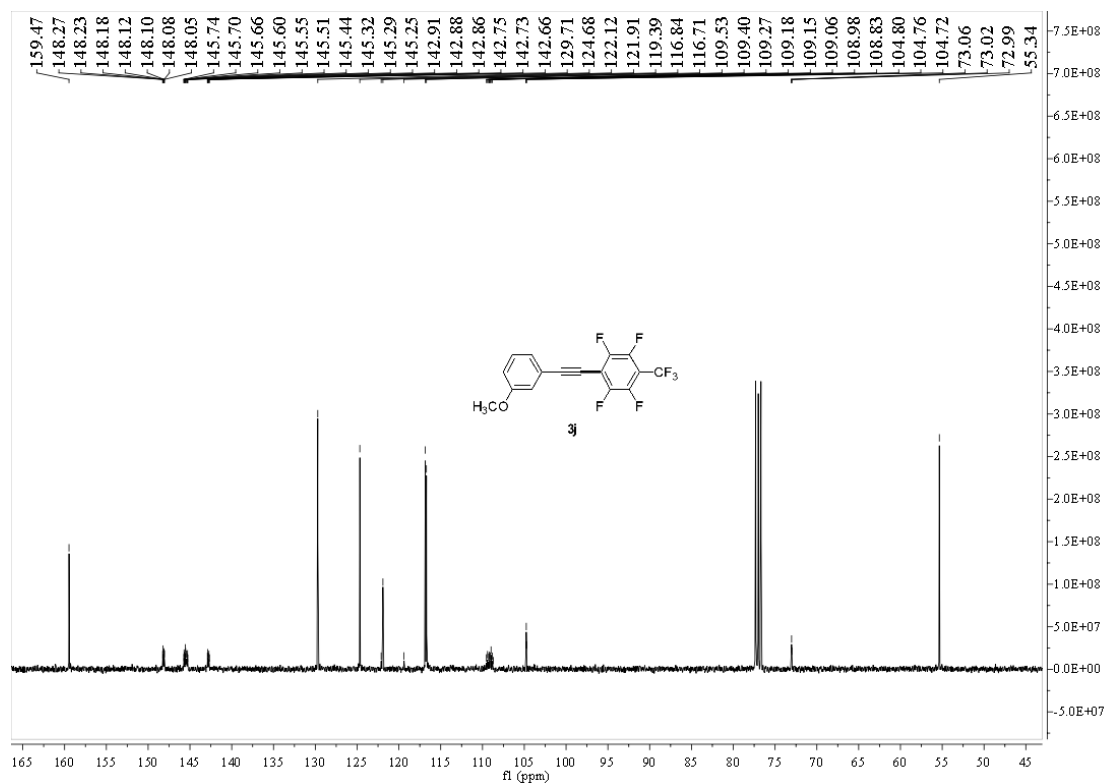

**<sup>1</sup>H NMR** (400 MHz, CDCl<sub>3</sub>) [ppm] δ 7.34 (t, *J* = 7.9 Hz, 1H), 7.22 (d, *J* = 7.6 Hz, 1H), 7.12 (s, 1H), 7.02 (dd, *J* = 8.3, 2.4 Hz, 1H), 3.87 (s, 3H); **<sup>19</sup>F NMR** (376 MHz, CDCl<sub>3</sub>) [ppm] δ -56.3 (t, *J* = 22.6 Hz, 3F), -134.6 to -134.7 (m, 2F), -140.8 to -141.1 (m, 2F); **<sup>13</sup>C NMR** (100 MHz, CDCl<sub>3</sub>) [ppm] δ 55.3, 73.0 (t, *J* = 3.5 Hz), 104.8 (t, *J* = 4.0

Hz), 108.7 – 109.5 (m), 116.7, 116.8, 120.7 (q,  $^1J_{CF} = 273.0$  Hz), 121.9, 124.7, 129.7, 142.7 – 142.9 (m), 145.3 – 145.7 (m), 148.1 – 148.3 (m), 159.5; **IR** (KBr)  $\nu$  (cm<sup>-1</sup>): 2944, 2226, 1648, 1603, 1491, 1341, 1271, 1147, 988, 873, 837, 712, 687, 561, 528; **HRMS** (EI) found: m/z 348.0378 [M]; calcd. for C<sub>16</sub>H<sub>7</sub>F<sub>7</sub>O 348.0385.

**1,2,4,5-tetrafluoro-3-((3-phenoxyphenyl)ethynyl)-6-(trifluoromethyl)benzene**

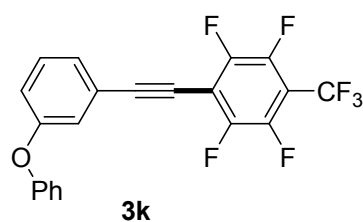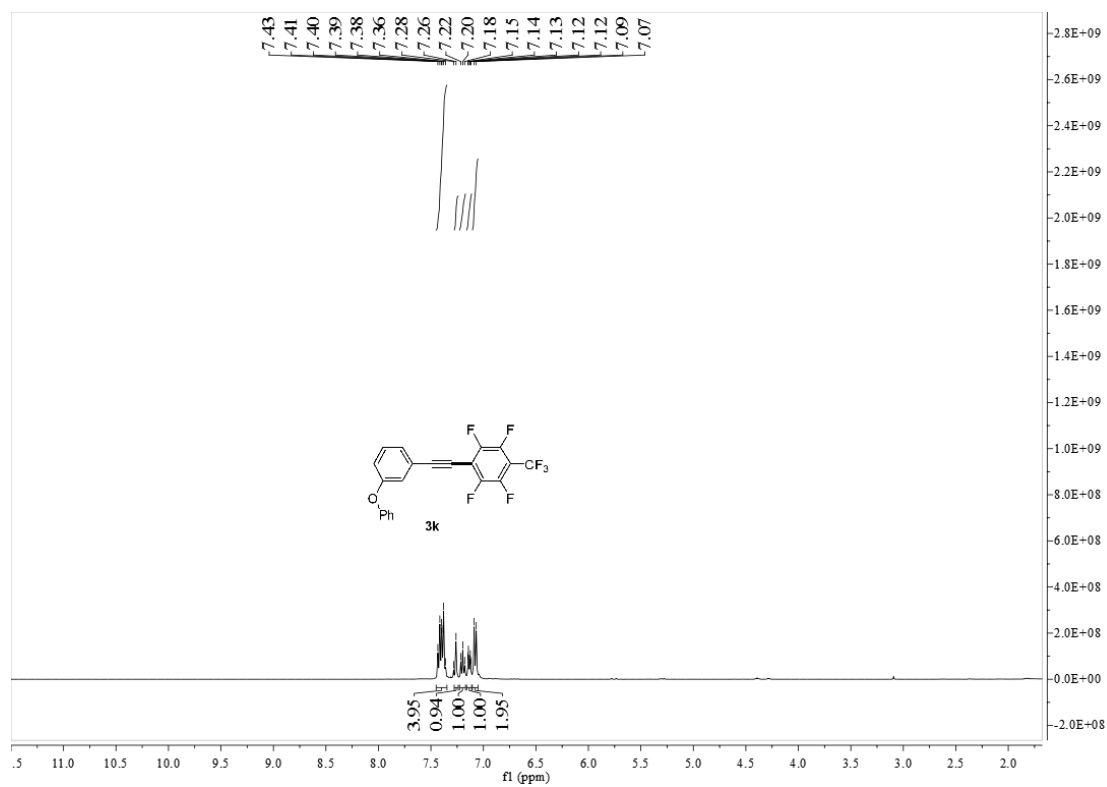



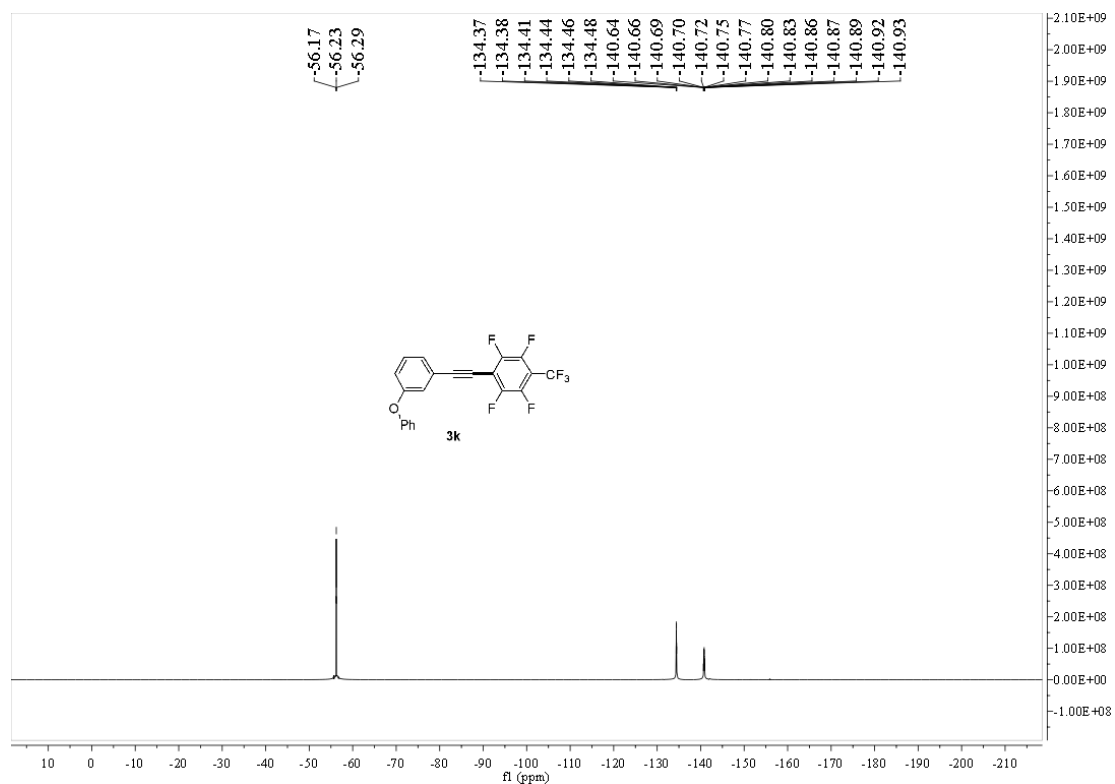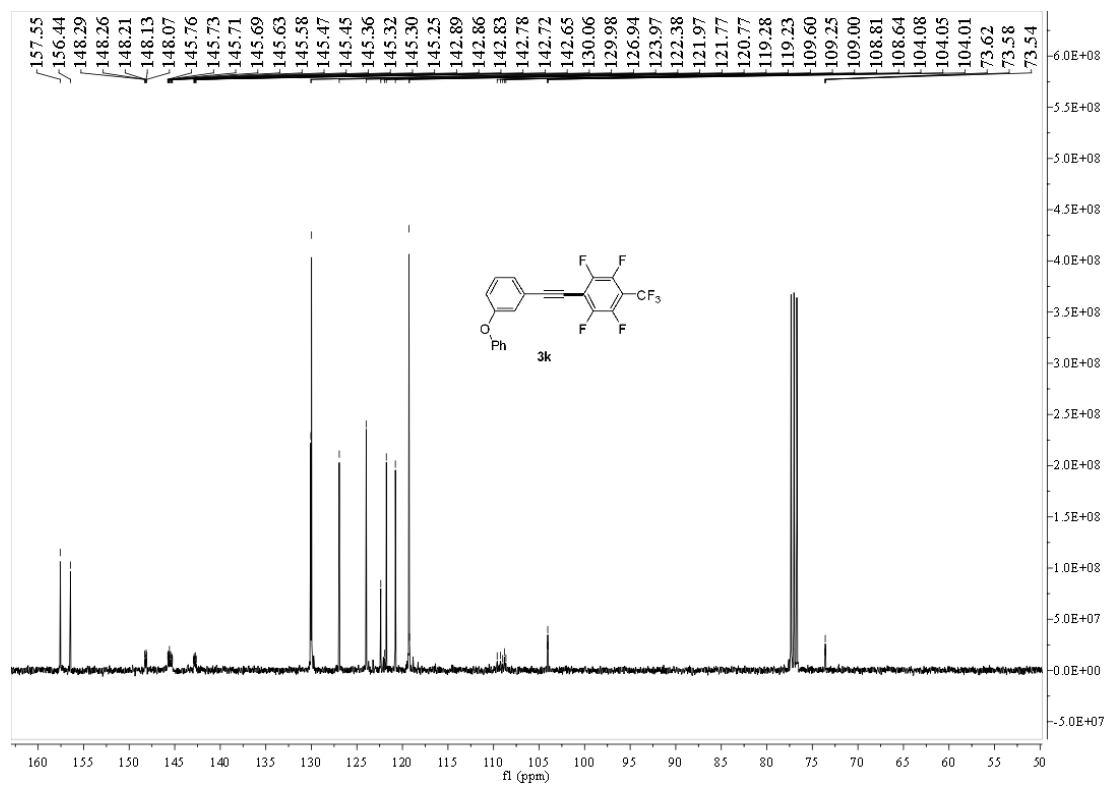

**<sup>1</sup>H NMR** (400 MHz, CDCl<sub>3</sub>) [ppm] δ 7.40 (dt, *J* = 14.0, 7.8 Hz, 4H), 7.26 (s, 1H), 7.20 (t, *J* = 7.4 Hz, 1H), 7.16 – 7.11 (m, 1H), 7.08 (d, *J* = 7.9 Hz, 2H); **<sup>19</sup>F NMR** (376 MHz, CDCl<sub>3</sub>) [ppm] δ -56.2 (t, *J* = 22.6 Hz, 3F), -134.4 to -134.5 (m, 2F), -140.6 to -140.9 (m, 2F); **<sup>13</sup>C NMR** (100 MHz, CDCl<sub>3</sub>) [ppm] δ 73.6 (t, *J* = 3.5 Hz), 104.1 (t, *J* = 3.5

Hz), 108.6 – 109.6 (m), 119.3, 120.6 (q,  $^1J_{CF} = 274.0$  Hz), 120.8, 121.8, 122.4, 124.0, 126.9, 130.0, 130.1, 142.7 – 142.9 (m), 145.3 – 145.8 (m), 148.1 – 148.3 (m), 156.4, 157.6; **IR** (KBr)  $\nu$  (cm<sup>-1</sup>): 2226, 1653, 1576, 1489, 1429, 1345, 1281, 1229, 1192, 1151, 1075, 989, 936, 872, 777, 716, 688, 579, 483; **HRMS** (EI) found:  $m/z$  410.0541 [M]; calcd. for C<sub>21</sub>H<sub>9</sub>F<sub>7</sub>O 410.0542.

**1,2,4,5-tetrafluoro-3-((2-methoxyphenyl)ethynyl)-6-(trifluoromethyl)benzene**

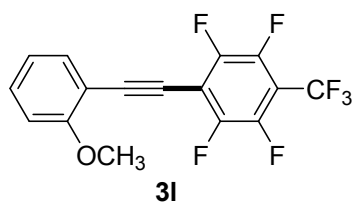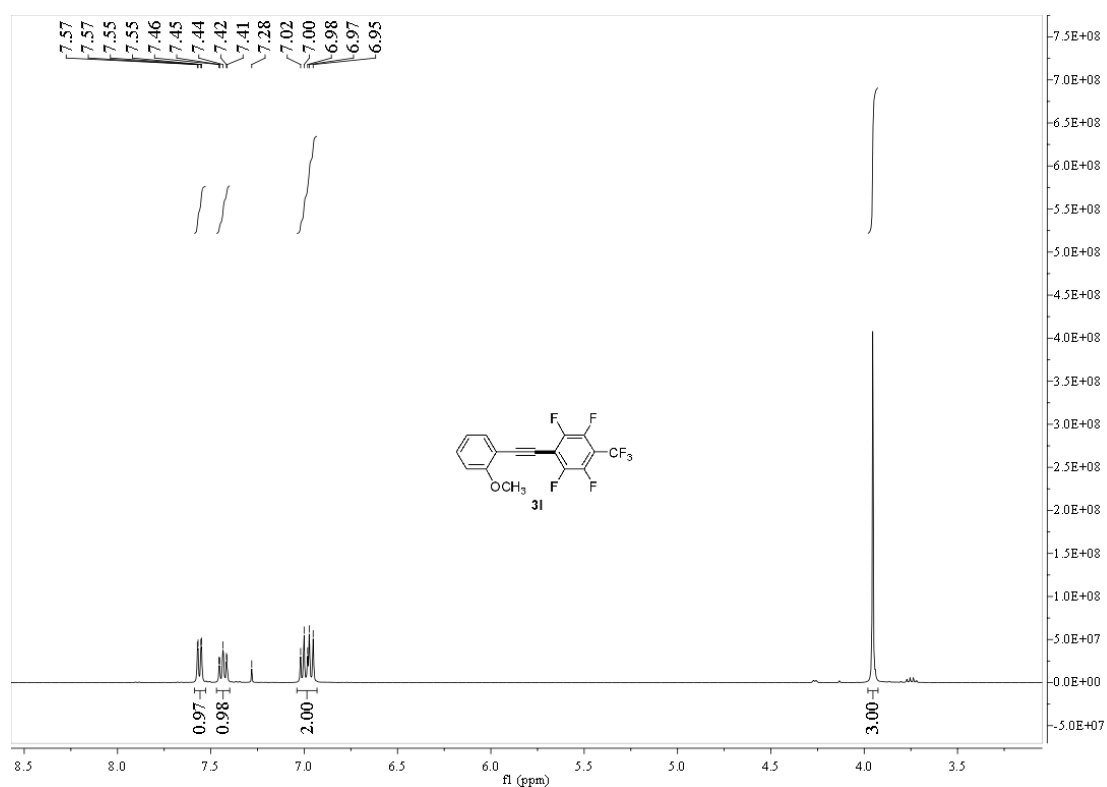

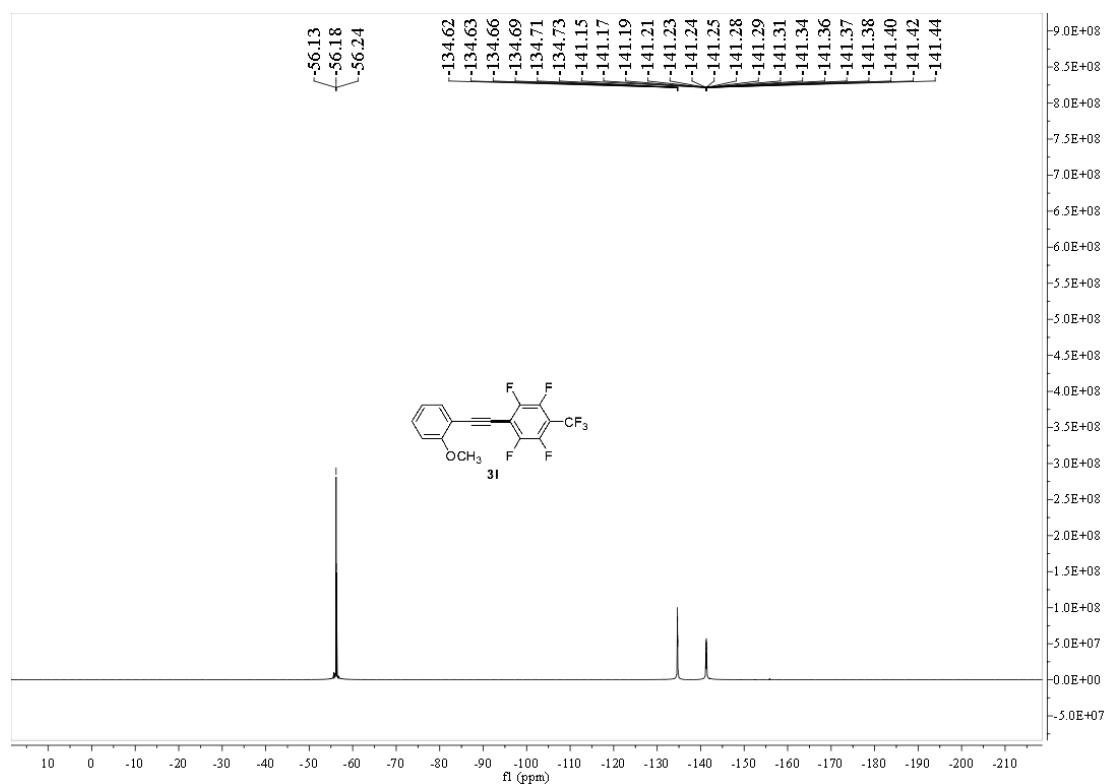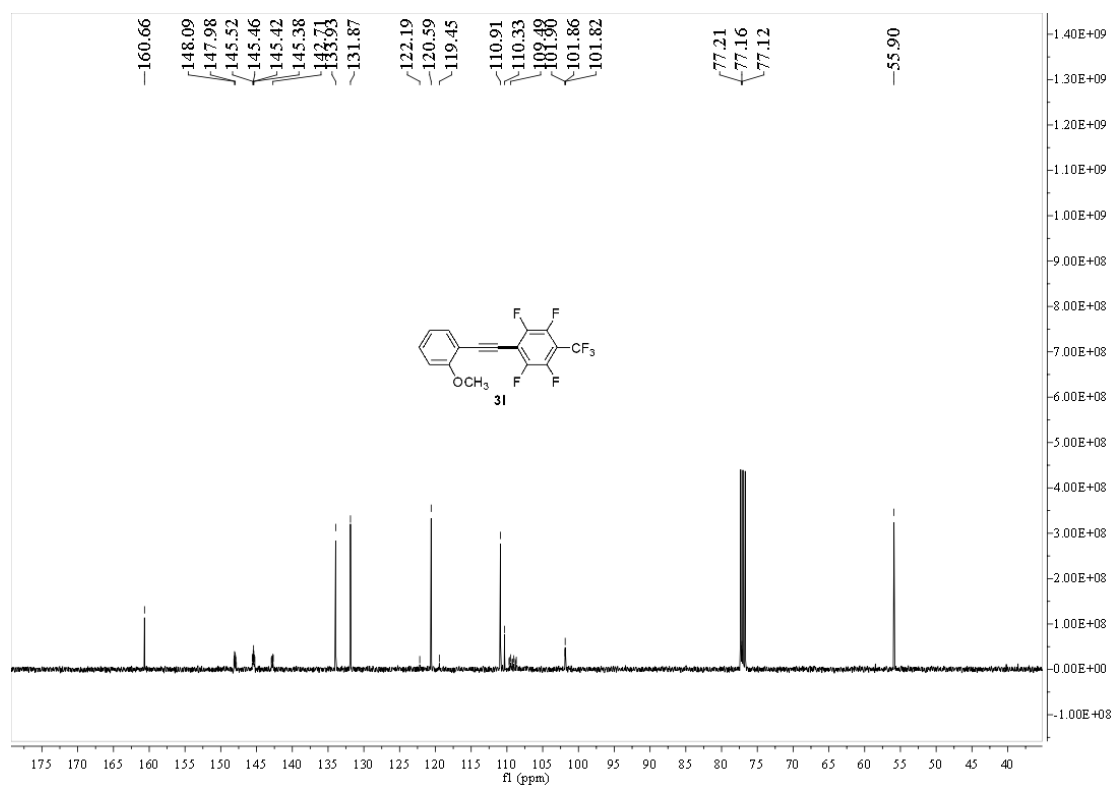

**<sup>1</sup>H NMR** (400 MHz, CDCl<sub>3</sub>) [ppm] δ 7.56 (dd, *J* = 7.6, 1.5 Hz, 1H), 7.47 – 7.40 (m, 1H), 7.04 – 6.93 (m, 2H), 3.95 (d, *J* = 5.6 Hz, 3H); **<sup>19</sup>F NMR** (376 MHz, CDCl<sub>3</sub>) [ppm] δ -56.2 (t, *J* = 20.7 Hz, 3F), -134.6 to -134.7 (m, 2F), -141.2 to -141.4 (m, 2F); **<sup>13</sup>C NMR** (100 MHz, CDCl<sub>3</sub>) [ppm] δ 55.9, 77.2 (t, *J* = 4.5 Hz), 101.9 (t, *J* = 4.0 Hz),

108.7 – 109.7 (m), 110.3, 110.9, 120.6, 120.8 (q,  $^1J_{CF} = 274.0$  Hz), 131.9, 133.9, 142.7 – 142.9 (m), 145.2 – 145.6 (m), 147.8 – 148.2 (m), 160.7; **IR** (KBr)  $\nu$  ( $\text{cm}^{-1}$ ): 2961, 2848, 2220, 1654, 1594, 1490, 1344, 1272, 1246, 1187, 1133, 1022, 986, 874, 804, 755, 713, 552, 491; **HRMS** (EI) found:  $m/z$  348.0378 [M]; calcd. for  $\text{C}_{16}\text{H}_7\text{F}_7\text{O}$  348.0385.

**1-((3,5-dimethylphenyl)ethynyl)-2,3,5,6-tetrafluoro-4-(trifluoromethyl)benzene**

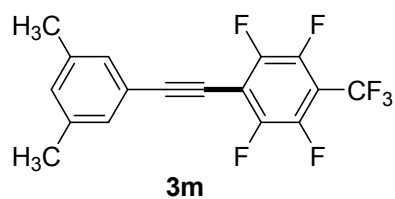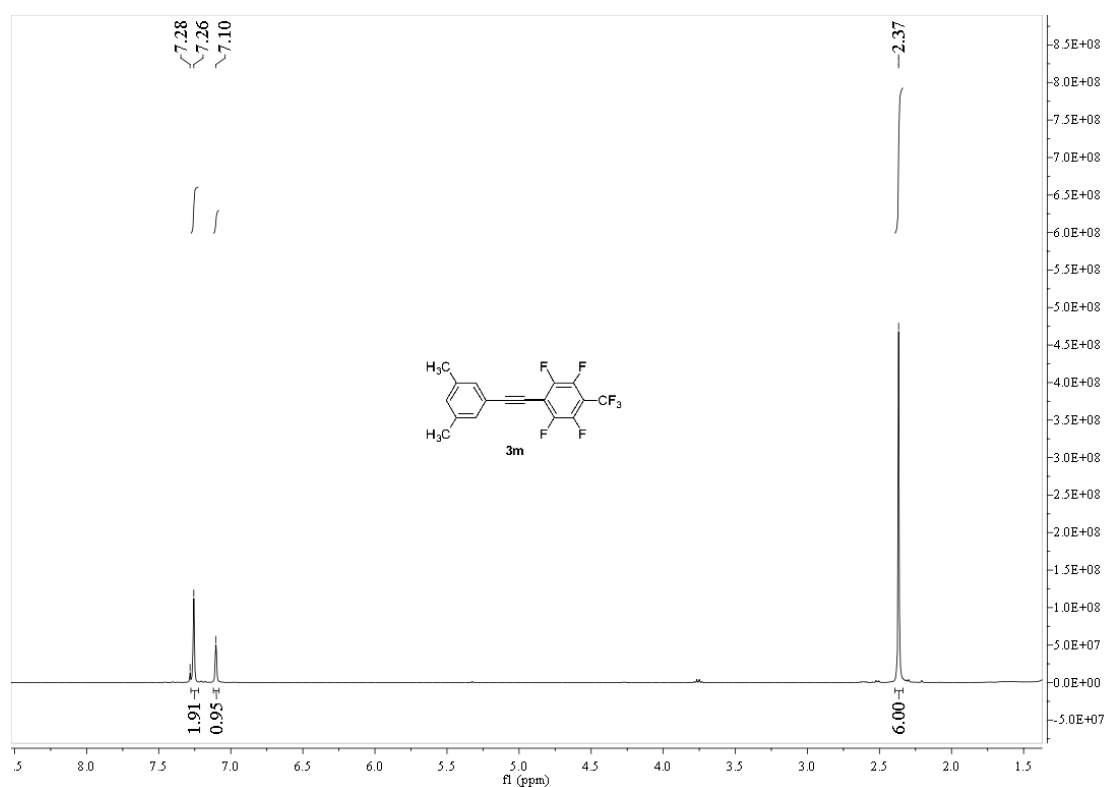

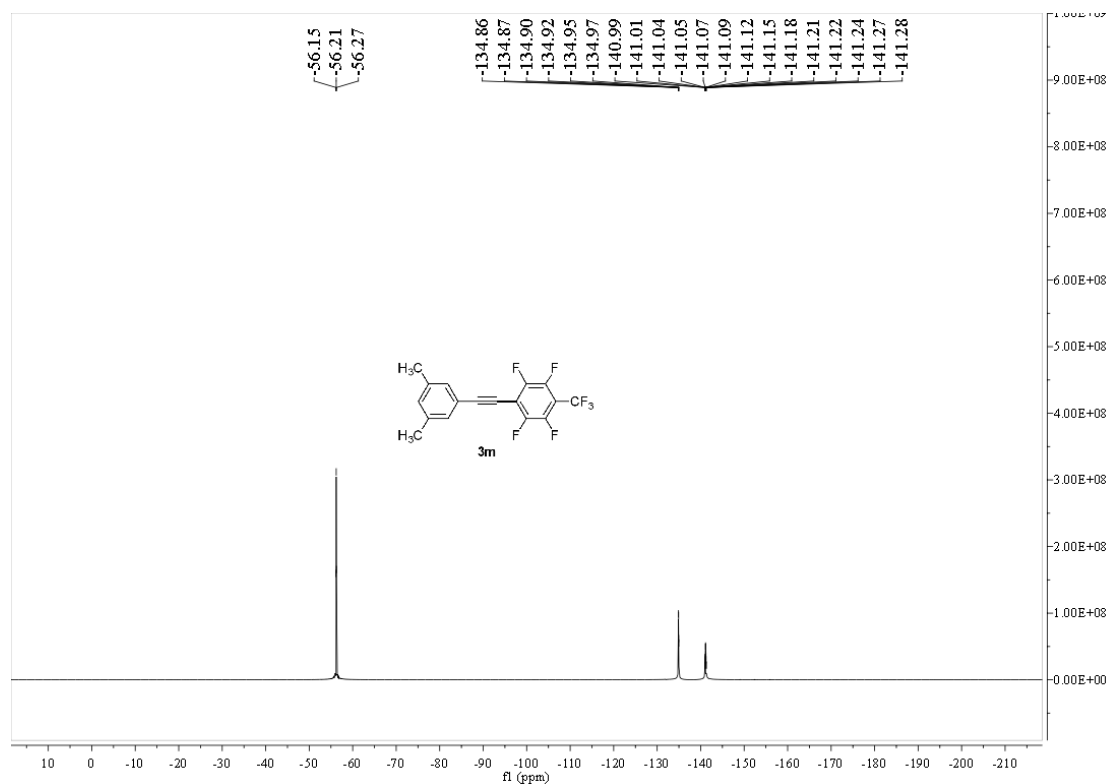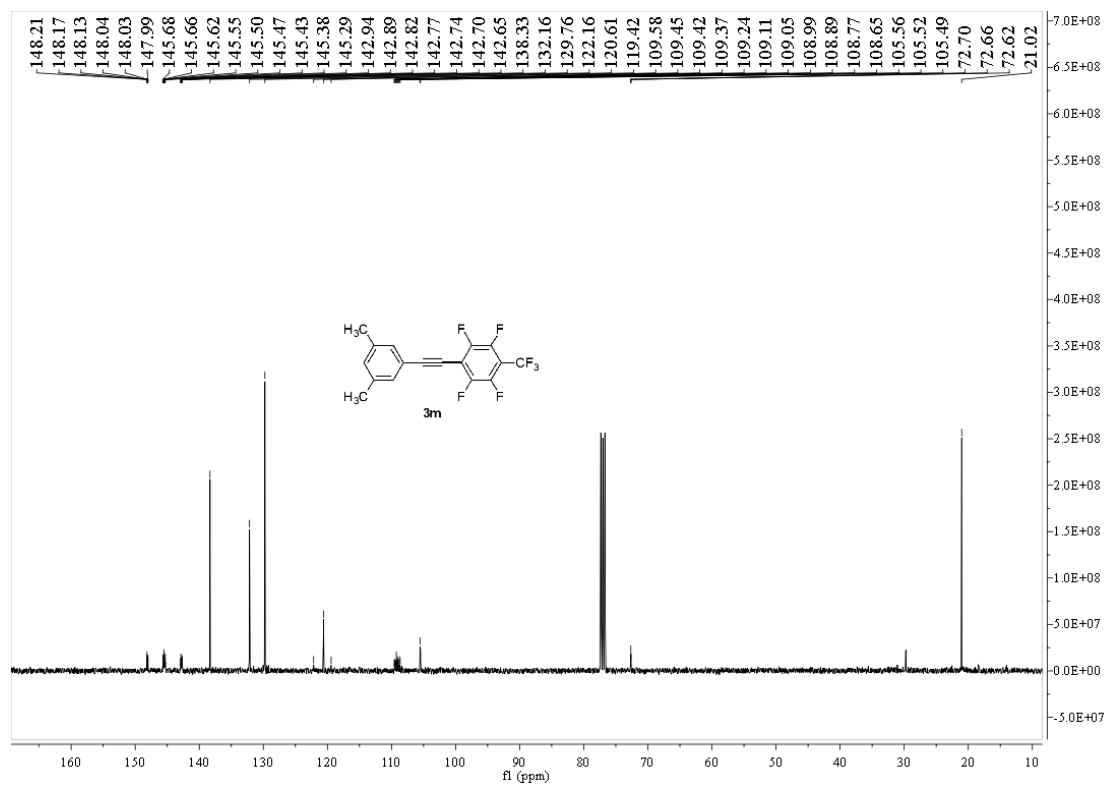

**<sup>1</sup>H NMR** (400 MHz, CDCl<sub>3</sub>) [ppm] δ 7.26 (s, 2H), 7.10 (s, 1H), 2.37 (s, 6H); **<sup>19</sup>F NMR** (376 MHz, CDCl<sub>3</sub>) [ppm] δ -56.2 (t, *J* = 22.6 Hz, 3F), -134.9 to -135.0 (m, 2F), -141.0 to -141.3 (m, 2F); **<sup>13</sup>C NMR** (100 MHz, CDCl<sub>3</sub>) [ppm] δ 21.0, 72.3 (t, *J* = 4.0 Hz), 105.5 (t, *J* = 3.5 Hz), 108.7 – 109.6 (m), 120.6, 120.8 (q, <sup>1</sup>*J*<sub>CF</sub> = 274.0 Hz),

129.8, 132.2, 138.3, 142.7 – 142.9 (m), 145.3 – 145.7 (m), 148.0 – 148.2 (m); **IR** (KBr)  $\nu$  (cm<sup>-1</sup>): 2923, 2855, 2219, 1653, 1596, 1487, 1384, 1344, 1305, 1232, 1195, 1138, 1041, 986, 850, 715, 684; **HRMS** (EI) found: m/z 346.0589 [M]; calcd. for C<sub>17</sub>H<sub>9</sub>F<sub>7</sub> 346.0592.

**1,2,4,5-tetrafluoro-3-(hex-1-ynyl)-6-(trifluoromethyl)benzene**

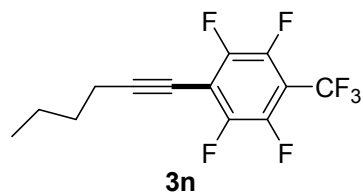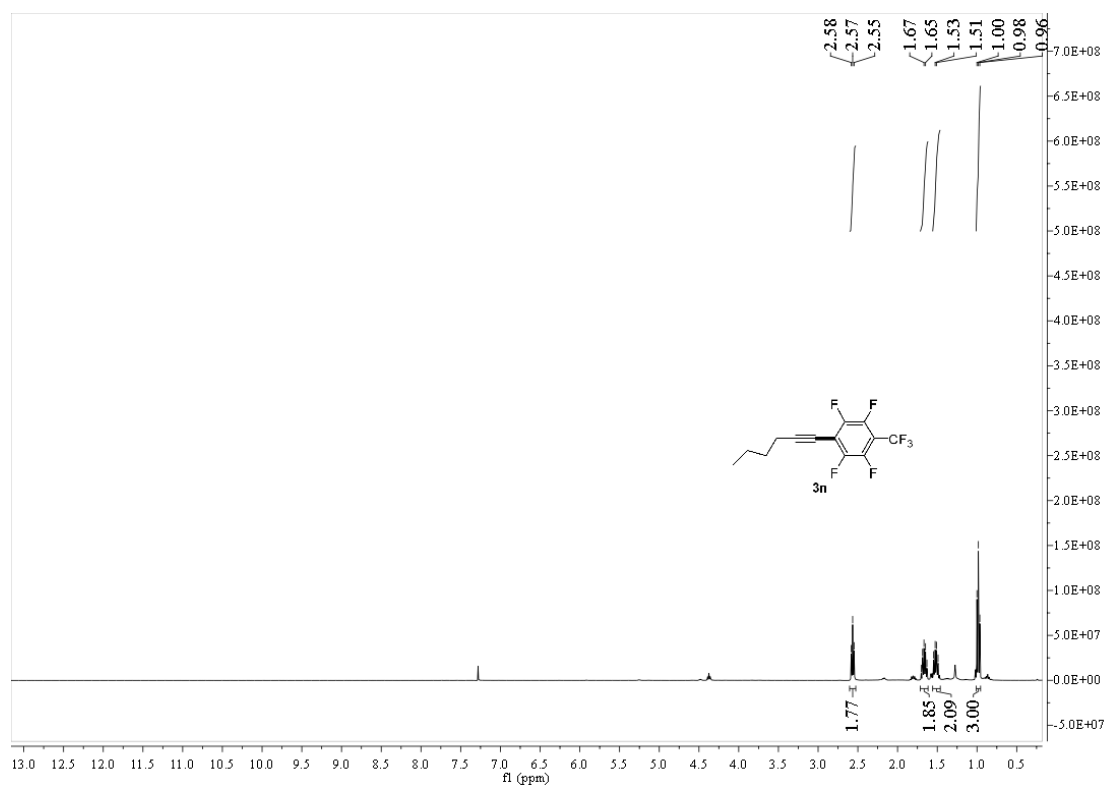

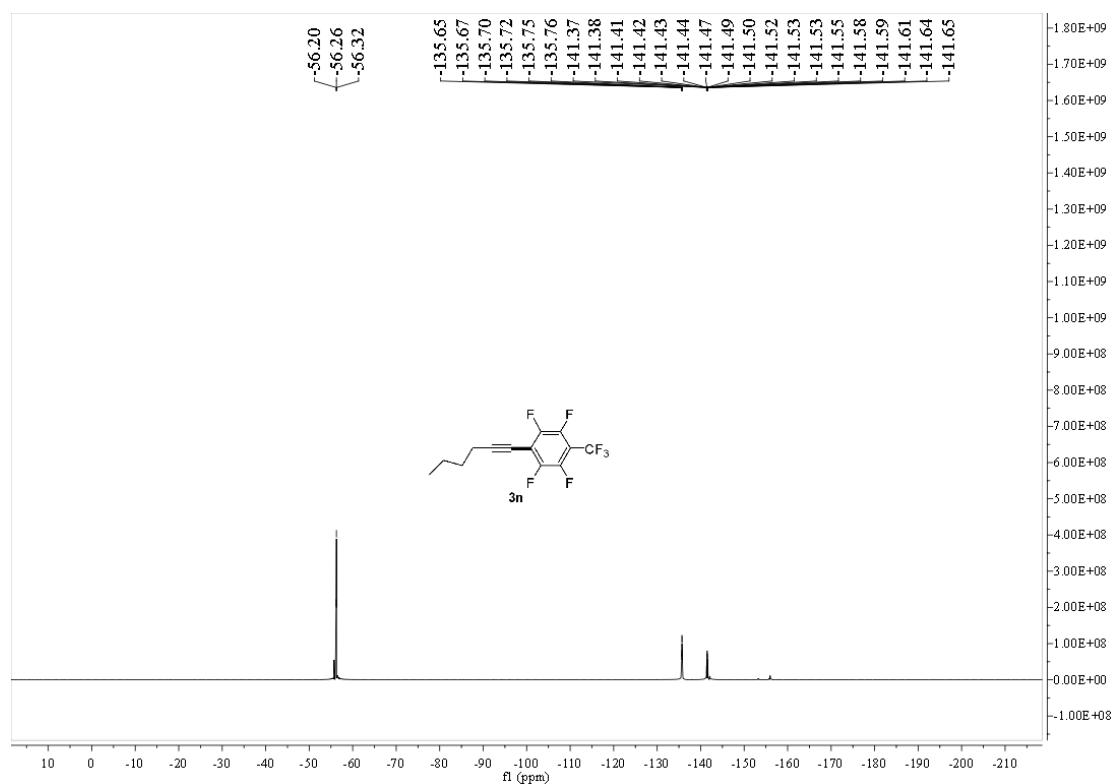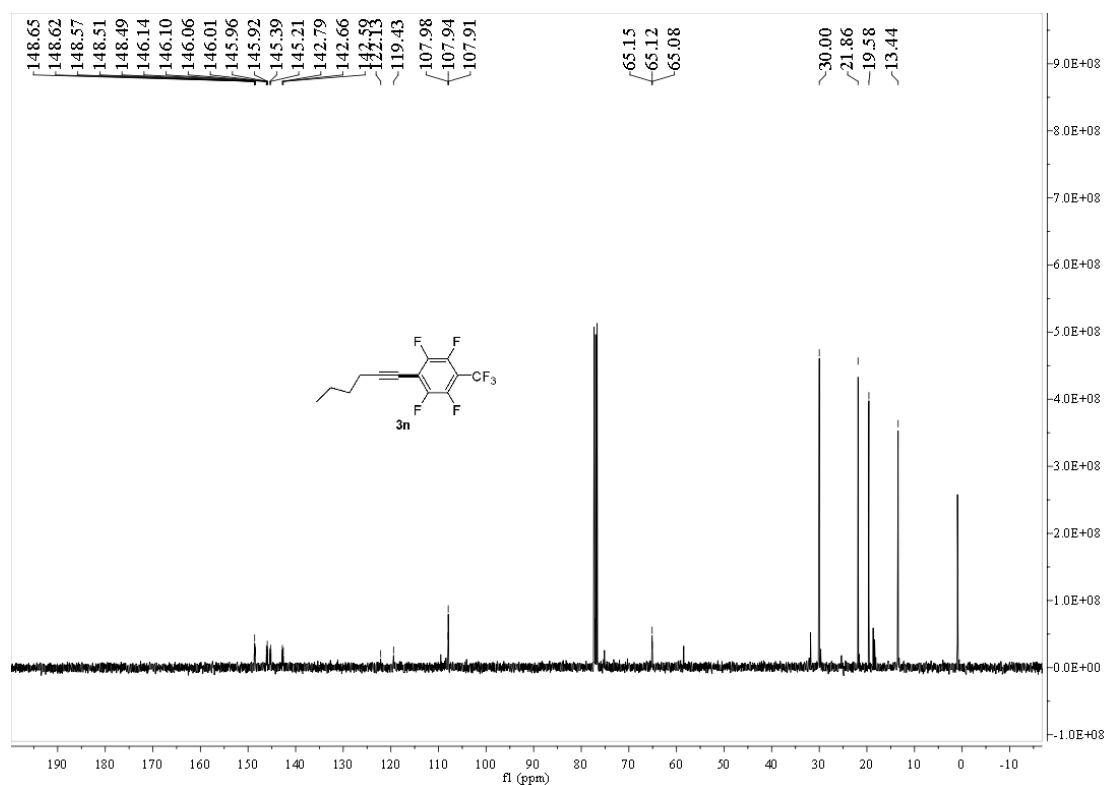

**<sup>1</sup>H NMR** (400 MHz, CDCl<sub>3</sub>) [ppm]  $\delta$  2.57 (t,  $J$  = 7.0 Hz, 2H), 1.71 – 1.62 (m, 2H), 1.52 (dd,  $J$  = 15.0, 7.4 Hz, 2H), 0.98 (t,  $J$  = 7.3 Hz, 3H); **<sup>19</sup>F NMR** (376 MHz, CDCl<sub>3</sub>) [ppm]  $\delta$  -56.3 (t,  $J$  = 22.6 Hz, 3F), -135.7 to -135.8 (m, 2F), -141.4 to -141.7 (m, 2F); **<sup>13</sup>C NMR** (100 MHz, CDCl<sub>3</sub>) [ppm]  $\delta$  13.4, 19.6, 21.9, 30.0, 65.1 (t,  $J$  = 3.5 Hz),

107.9 (t,  $J = 3.5$  Hz), 120.8 (q,  $^1J_{CF} = 270.0$  Hz), 142.6 – 142.9 (m), 145.2 – 145.5 (m), 145.9 – 146.1, 148.0 – 148.2 (m); **IR** (KBr)  $\nu$  ( $\text{cm}^{-1}$ ): 2961, 2928, 2861, 2241, 1728, 1654, 1611, 1501, 1429, 1378, 1340, 1260, 1228, 1186, 1146, 1096, 999, 872, 799, 712, 400; **HRMS** (EI) found:  $m/z$  298.0580 [M]; calcd. for  $\text{C}_{13}\text{H}_9\text{F}_7$  298.0592.

### 1-(cyclopropylethynyl)-2,3,5,6-tetrafluoro-4-(trifluoromethyl)benzene

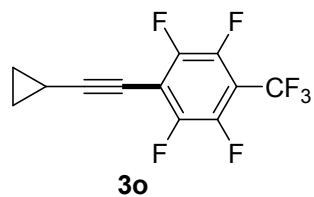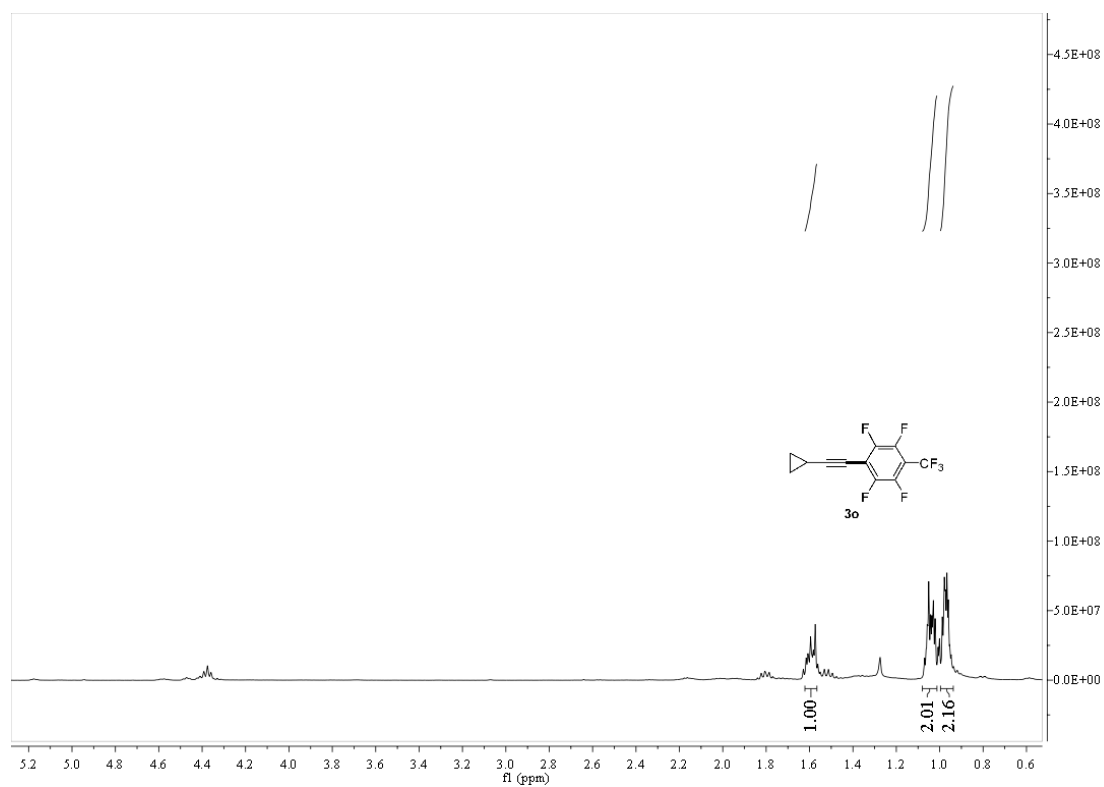



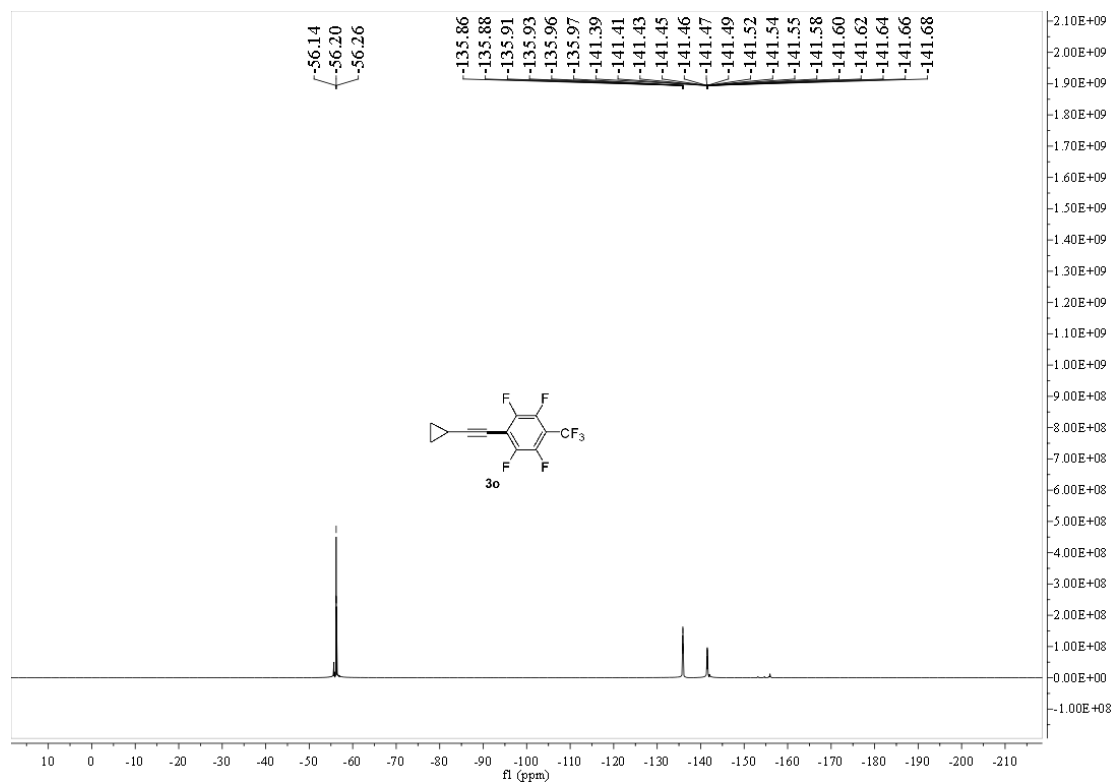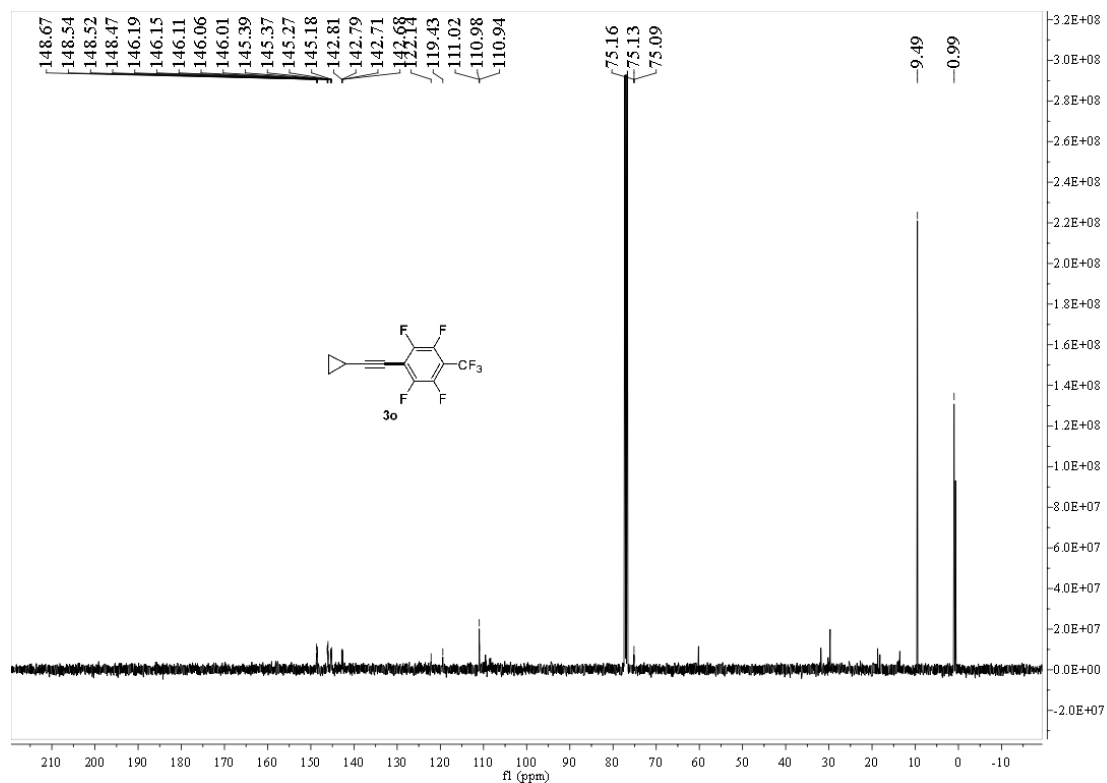

**<sup>1</sup>H NMR** (400 MHz, CDCl<sub>3</sub>) [ppm] δ 1.62 – 1.57 (m, 1H), 1.05 (ddd, *J* = 8.3, 5.6, 3.3 Hz, 2H), 0.96 (ddd, *J* = 9.0, 6.0, 3.7 Hz, 2H); **<sup>19</sup>F NMR** (376 MHz, CDCl<sub>3</sub>) [ppm] δ -56.2 (t, *J* = 22.6 Hz, 3F), -135.9 to -136.0 (m, 2F), -141.4 to -141.7 (m, 2F); **<sup>13</sup>C NMR** (100 MHz, CDCl<sub>3</sub>) [ppm] δ 1.0, 9.5, 75.1 (t, *J* = 3.5 Hz), 111.0 (t, *J* = 4.0 Hz),

120.8 (q,  $^1J_{CF} = 271.0$  Hz), 142.6 – 142.8 (m), 145.2 – 145.4 (m), 146.0 – 146.2, 148.5 – 148.8 (m); **IR** (KBr)  $\nu$  ( $\text{cm}^{-1}$ ): 3067, 2923, 1642, 1508, 1453, 1318, 1259, 1177, 1131, 952, 929, 848, 787, 741, 608, 431; **HRMS** (EI) found:  $m/z$  282.0270 [M]; calcd. for  $\text{C}_{12}\text{H}_5\text{F}_7$  282.0279.

### Trimethyl((2,3,5,6-tetrafluoro-4-(trifluoromethyl)phenyl)ethynyl)silane

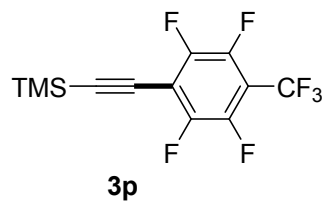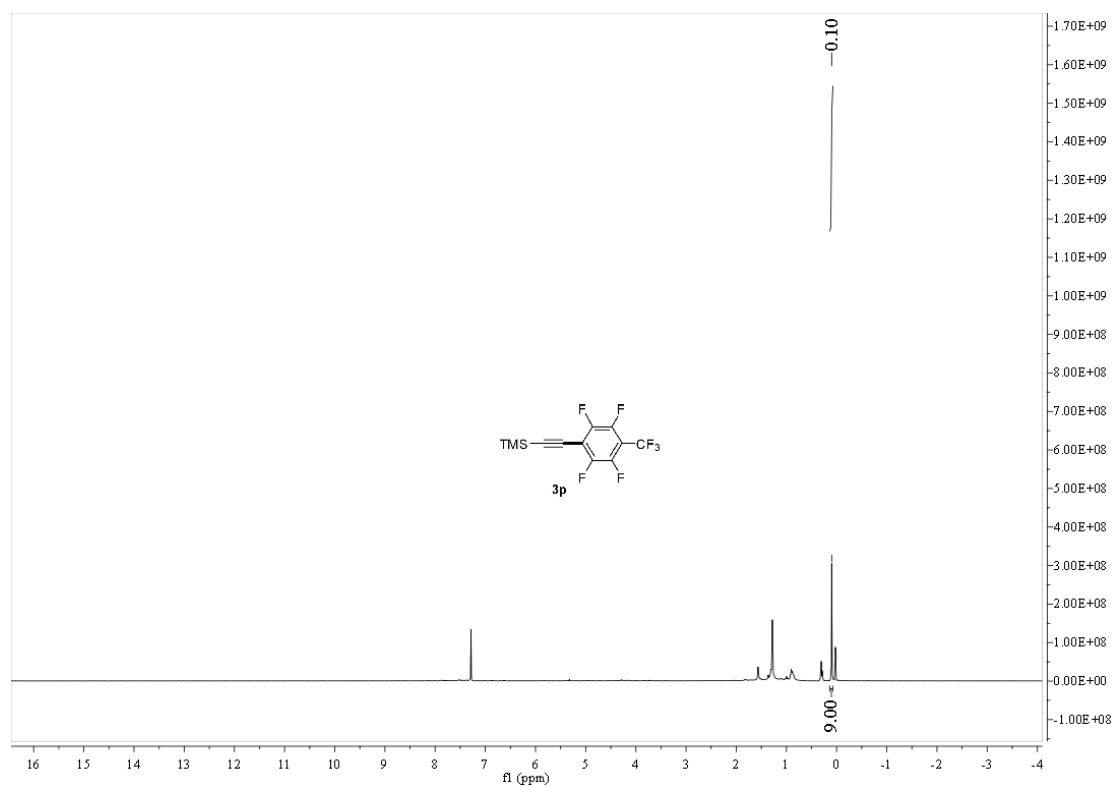

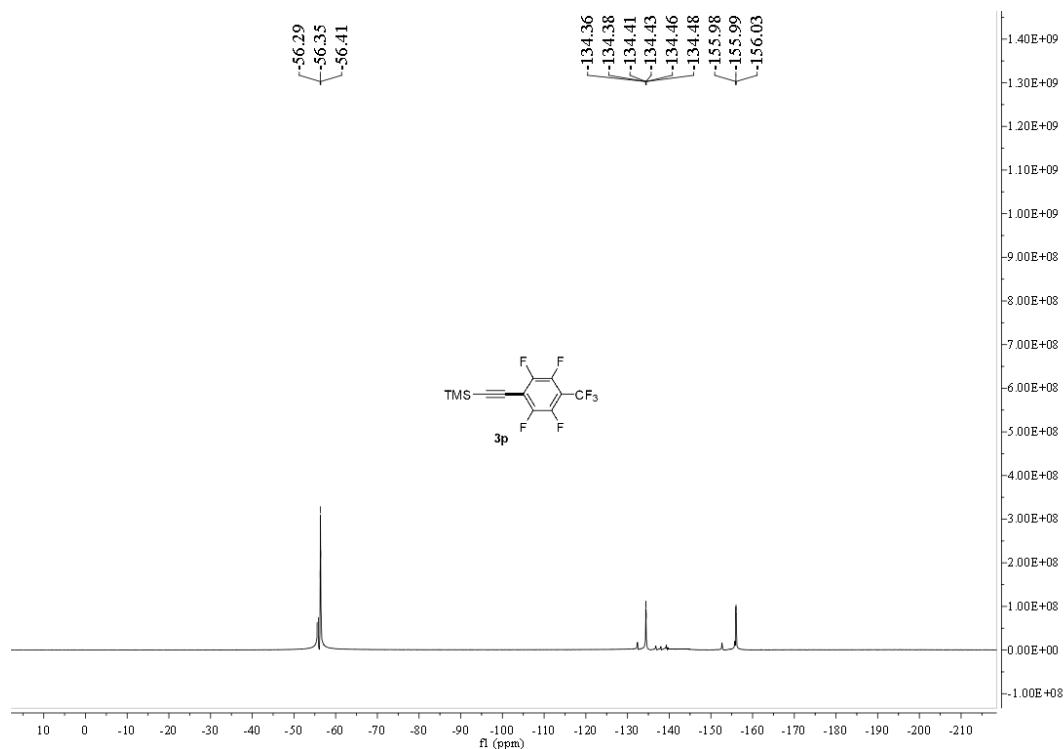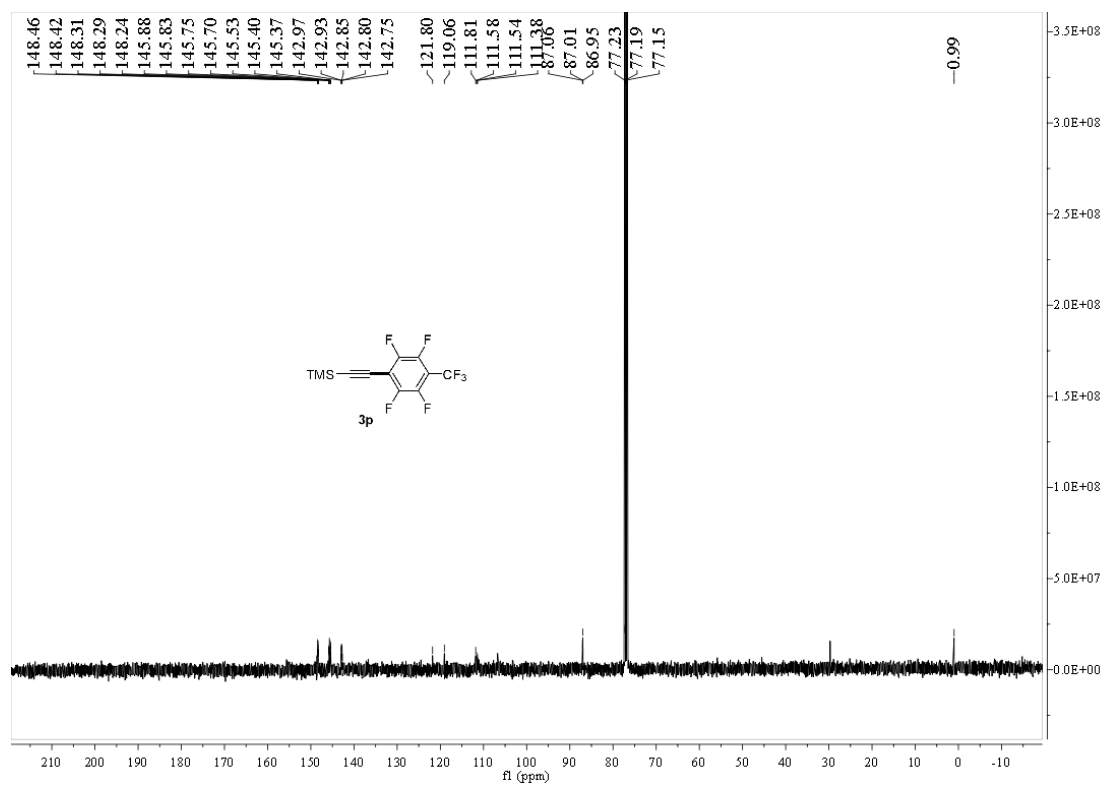

**<sup>1</sup>H NMR** (400 MHz, CDCl<sub>3</sub>) [ppm] δ 0.10 (s, 9H); **<sup>19</sup>F NMR** (376 MHz, CDCl<sub>3</sub>) [ppm] δ -56.4 (t, *J* = 22.6 Hz, 3F), -134.4 to -134.5 (m, 2F), -155.9 to -156.0 (m, 2F); **<sup>13</sup>C NMR** (100 MHz, CDCl<sub>3</sub>) [ppm] δ 29.7, 77.2 (t, *J* = 4.0 Hz), 87.0 (t, *J* = 5.5 Hz), 120.4 (q, <sup>1</sup>*J*<sub>CF</sub> = 274.0 Hz), 111.1 – 111.8 (m), 142.7 – 143.0 (m), 145.4 – 145.9, 148.2 – 148.6 (m); **IR** (KBr) ν (cm<sup>-1</sup>): 2961, 2920, 2852, 2218, 1731, 1656, 1604, 1500,

1427, 1340, 1259, 1229, 1187, 1149, 1002, 801, 714, 402; **HRMS** (EI) found: m/z 314.0364 [M]; calcd. for C<sub>12</sub>H<sub>9</sub>F<sub>7</sub>Si 314.0362.

**2,3,5,6-tetrafluoro-4-(phenylethynyl)pyridine**

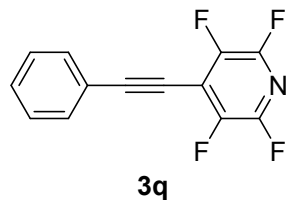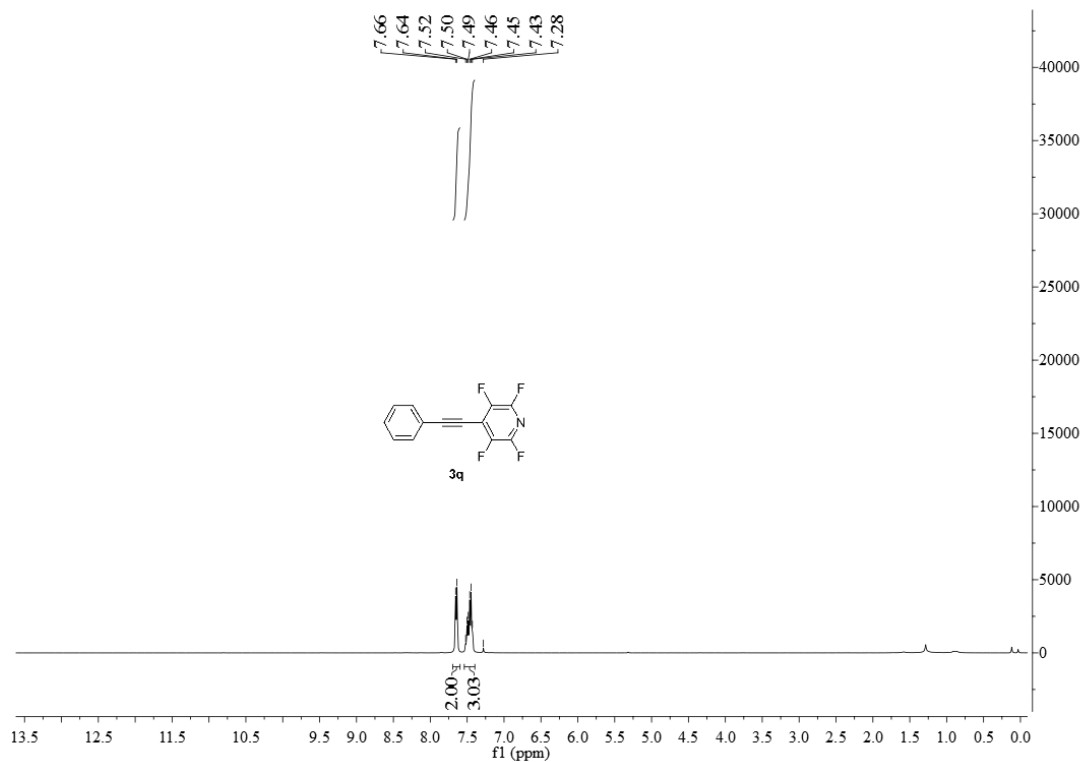

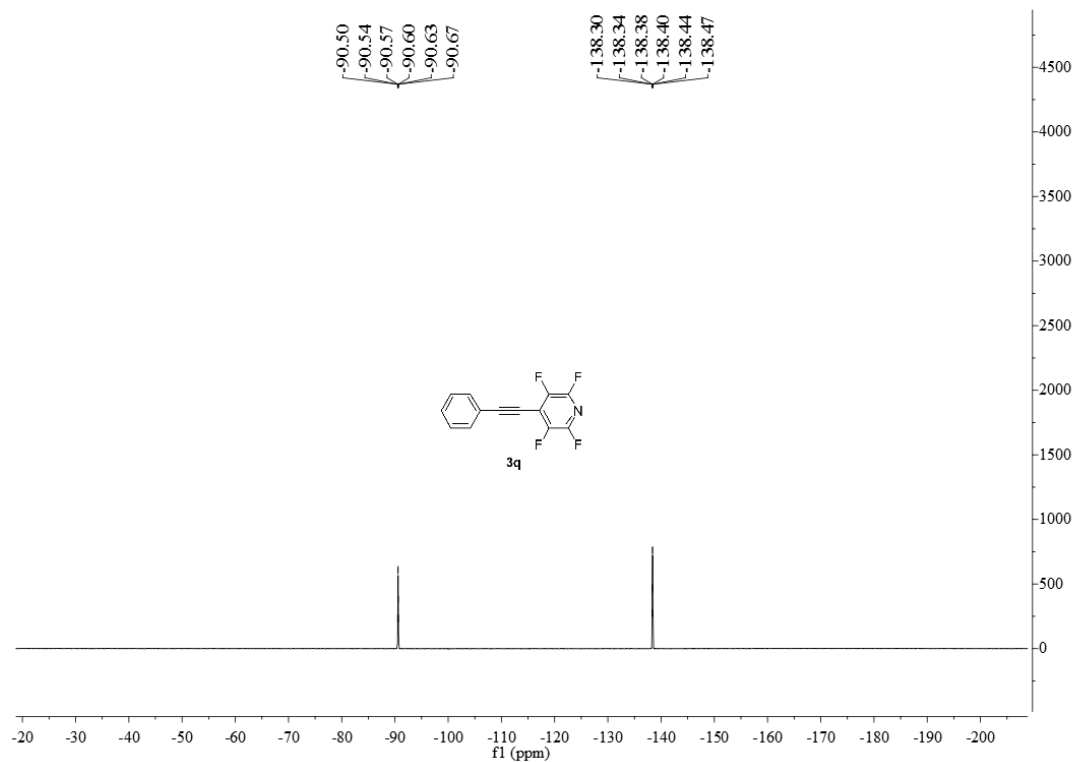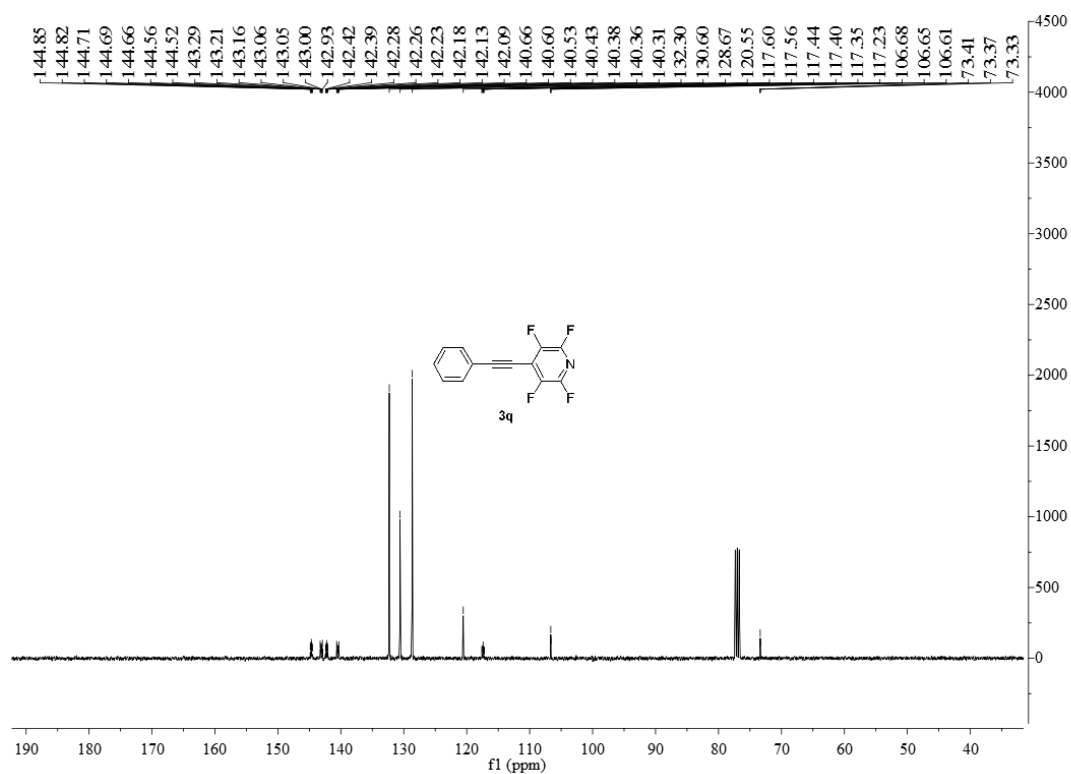

**<sup>1</sup>H NMR** (400 MHz, CDCl<sub>3</sub>) [ppm] δ 7.65 (d, *J* = 7.2 Hz, 2H), 7.47 (dq, *J* = 14.4, 7.0 Hz, 3H); **<sup>19</sup>F NMR** (376 MHz, CDCl<sub>3</sub>) [ppm] δ -90.50 to -90.67 (m, 2F), -138.30 to -138.47 (m, 2F); **<sup>13</sup>C NMR** (100 MHz, CDCl<sub>3</sub>) [ppm] δ 73.4 (t, *J* = 4.0 Hz), 106.6 (t, *J* = 3.5 Hz), 117.2 – 117.6 (m), 120.6, 128.7, 130.6, 132.3, 140.3 – 140.7 (m), 142.1

- 142.4 (m), 142.9 - 143.3 (m), 144.5 - 144.8 (m); **IR** (KBr)  $\nu$  (cm<sup>-1</sup>): 2216, 1637, 1579, 1491, 1414, 1308, 1279, 1210, 994, 964, 759, 728, 613, 580, 529.

**2,3,5,6-tetrafluoro-4-(phenylethynyl)benzonitrile**

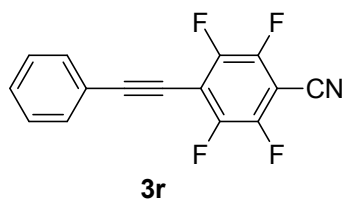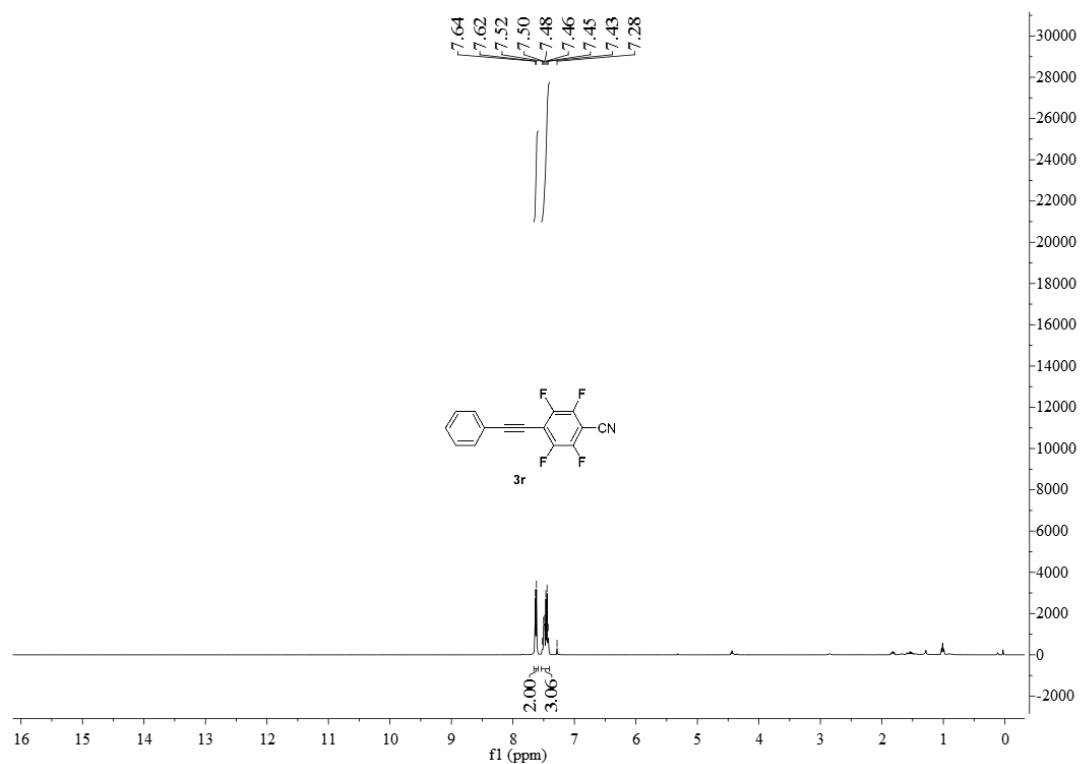

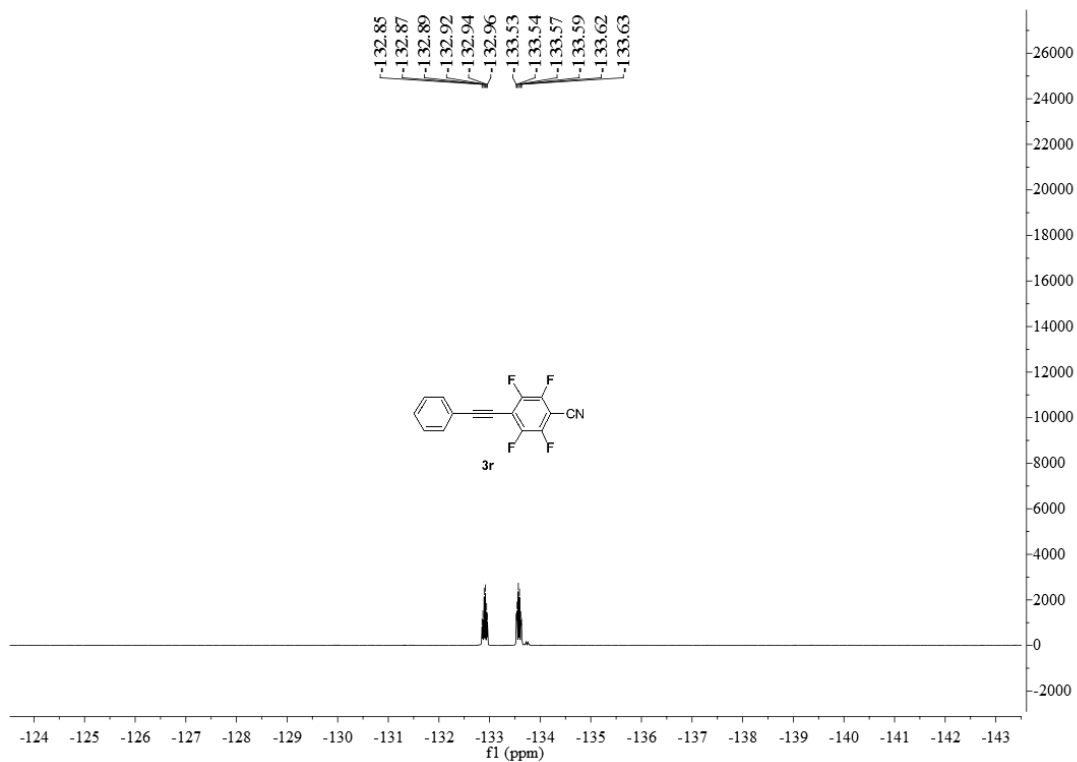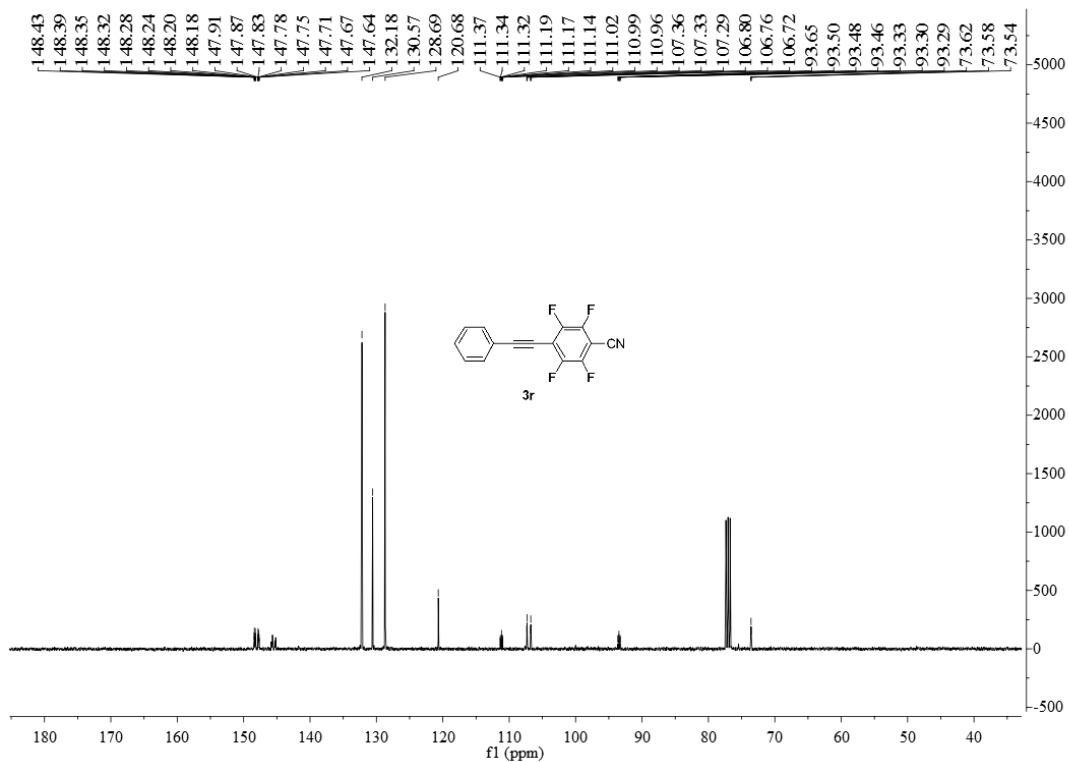

**<sup>1</sup>H NMR** (400 MHz, CDCl<sub>3</sub>) δ 7.63 (d, *J* = 7.1 Hz, 2H), 7.57 – 7.38 (m, 3H); **<sup>19</sup>F NMR** (376 MHz, CDCl<sub>3</sub>) [ppm] δ -132.85 to -132.96 (m, 2F), -133.53 to -133.63 (m, 2F); **<sup>13</sup>C NMR** (100 MHz, CDCl<sub>3</sub>) [ppm] δ 73.6 (t, *J* = 4.0 Hz), 93.3 – 93.6 (m), 106.8 (t, *J* = 4.0 Hz), 107.3 (t, *J* = 3.5 Hz), 111.0 – 111.4 (m), 120.7, 128.7, 130.6, 132.2,

145.1 – 145.3 (m), 145.6 – 145.8 (m), 147.6 – 147.9 (m), 148.2 – 148.4 (m); **IR**  
(KBr)  $\nu$  (cm<sup>-1</sup>): 2218, 1638, 1484, 1383, 1326, 1270, 1066, 981, 926, 759, 690, 657,  
530.

**((perfluoro-1,4-phenylene)bis(ethyne-2,1-diyl))dibenzene**

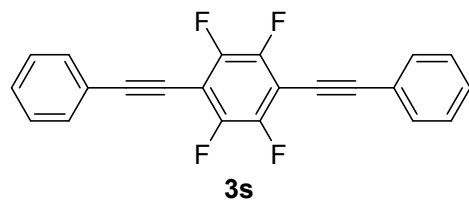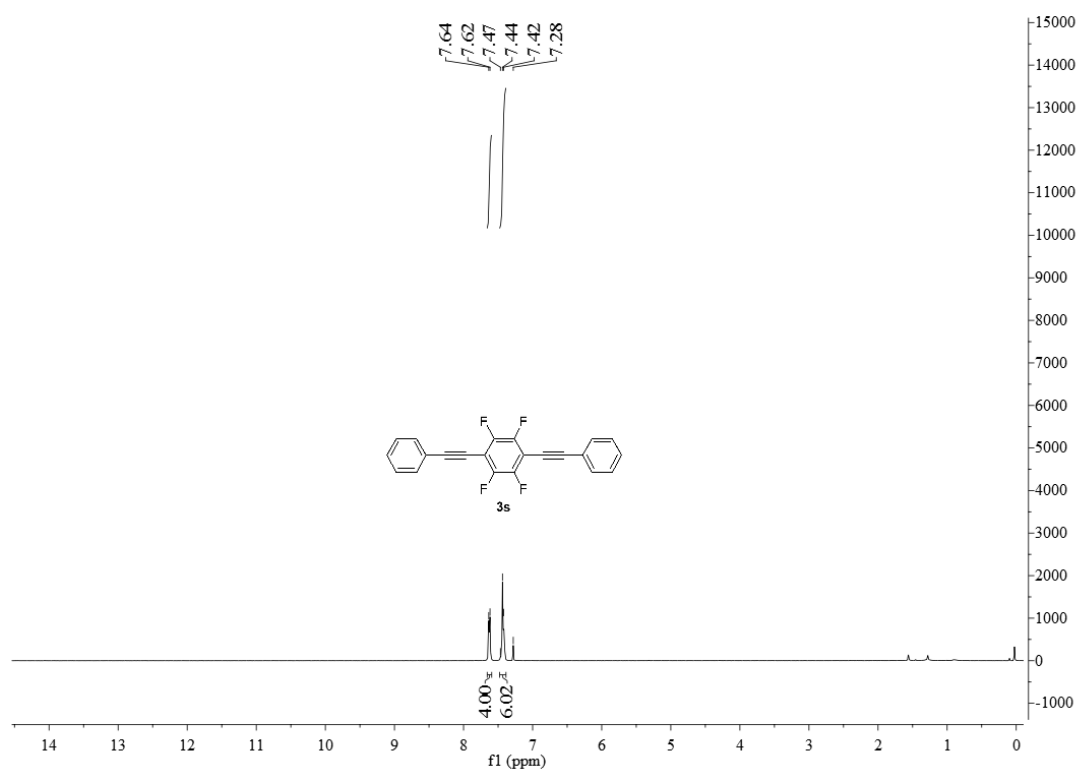



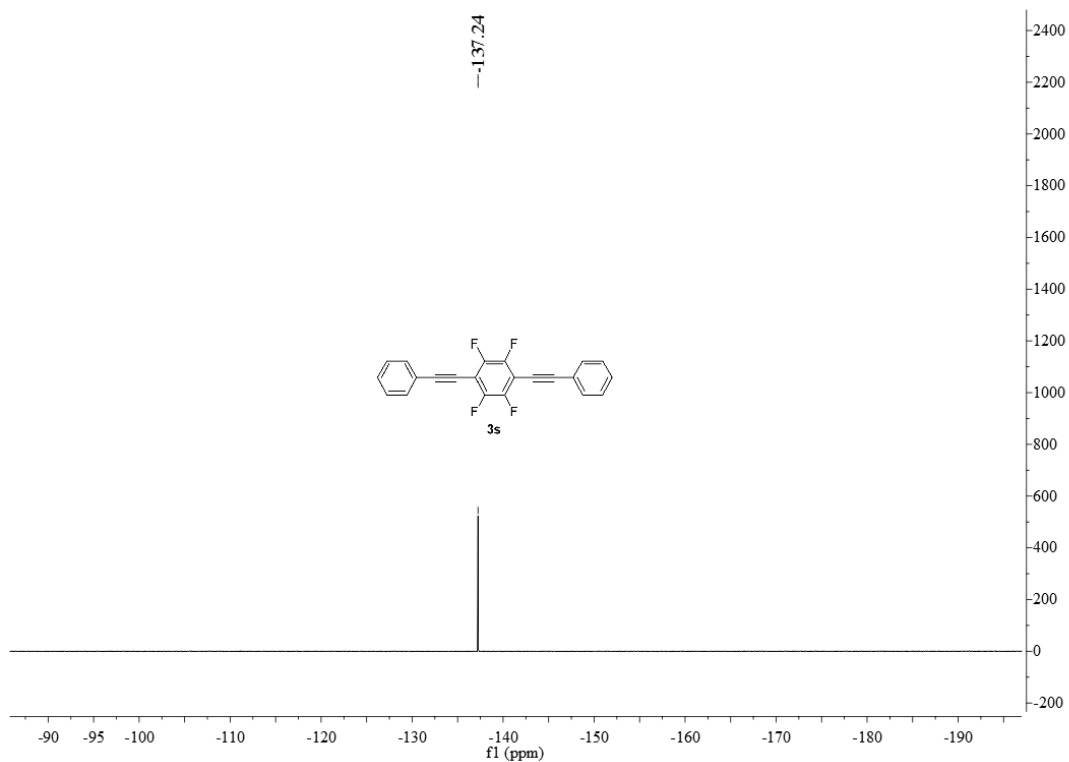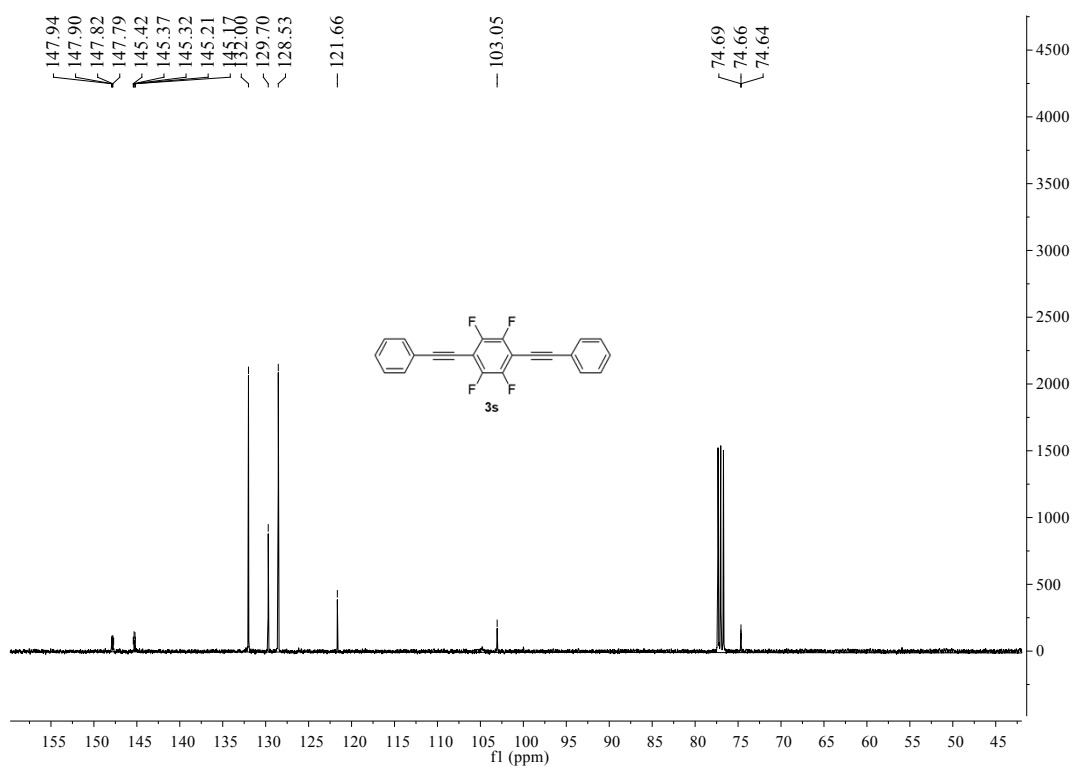

$^1\text{H}$  NMR (400 MHz,  $\text{CDCl}_3$ )  $\delta$  7.63 (d,  $J = 7.3$  Hz, 4H), 7.44 (t,  $J = 9.3$  Hz, 6H);  $^{19}\text{F}$  NMR (376 MHz,  $\text{CDCl}_3$ ) [ppm]  $\delta$  -137.24 (s, 4F);  $^{13}\text{C}$  NMR (100 MHz,  $\text{CDCl}_3$ ) [ppm]  $\delta$  74.7 (t,  $J = 2.5$  Hz), 103.0, 121.7, 128.5, 129.7, 132.0, 145.2 – 145.4 (m), 147.7 – 147.9 (m); IR (KBr)  $\nu$  ( $\text{cm}^{-1}$ ): 1519, 1484, 1446, 1400, 1333, 1068, 974, 754, 686,

585, 526; **HRMS** (EI) found:  $m/z$  350.0721 [M]; calcd. for  $C_{22}H_{10}F_4$  350.0719.

**1,2,4,5-tetrafluoro-3-phenethyl-6-(trifluoromethyl)benzene**

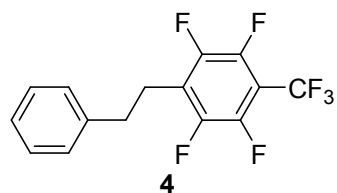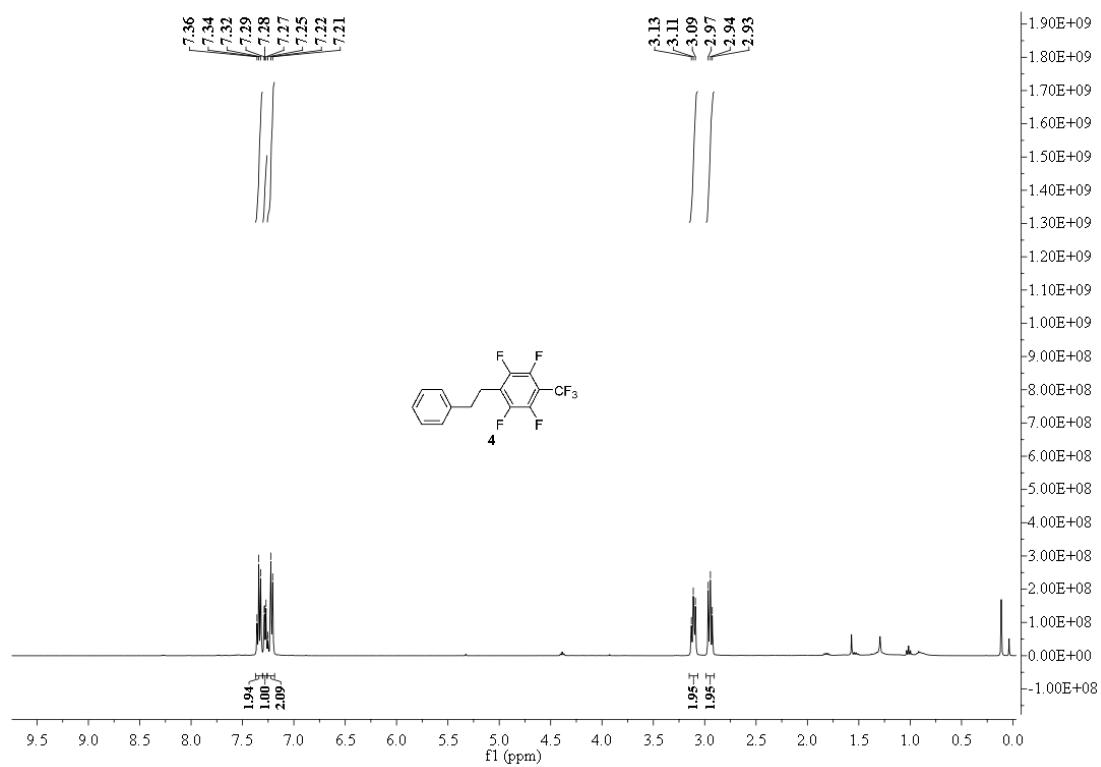

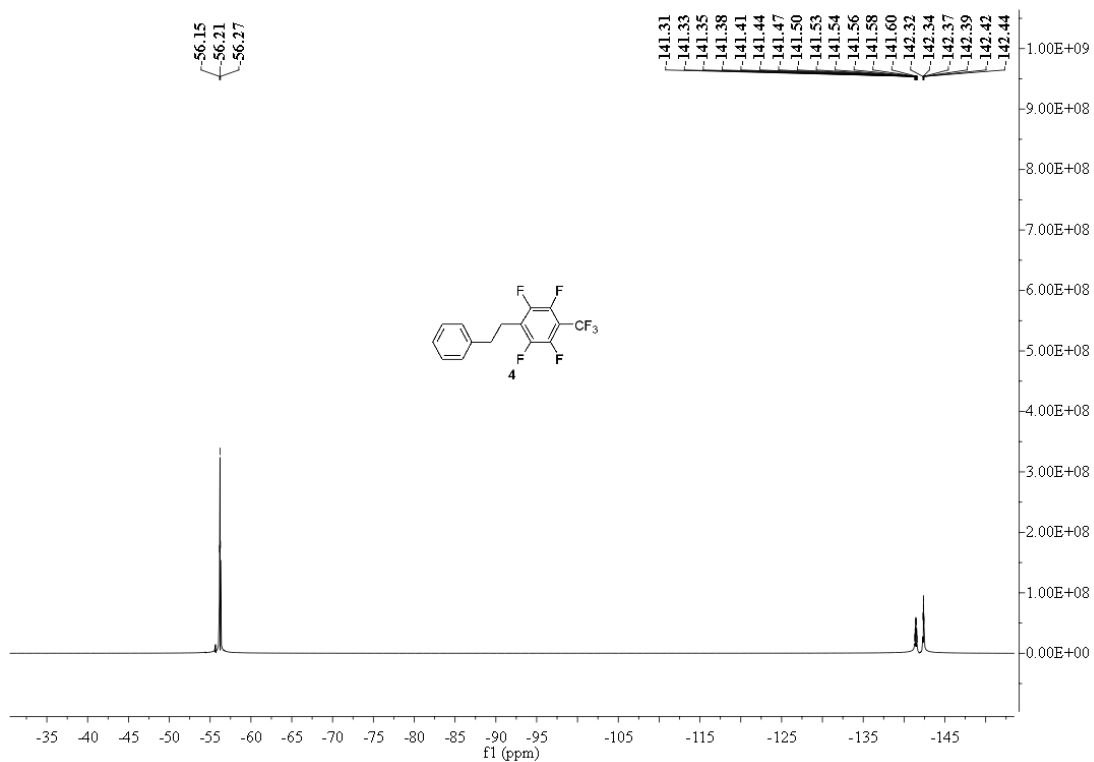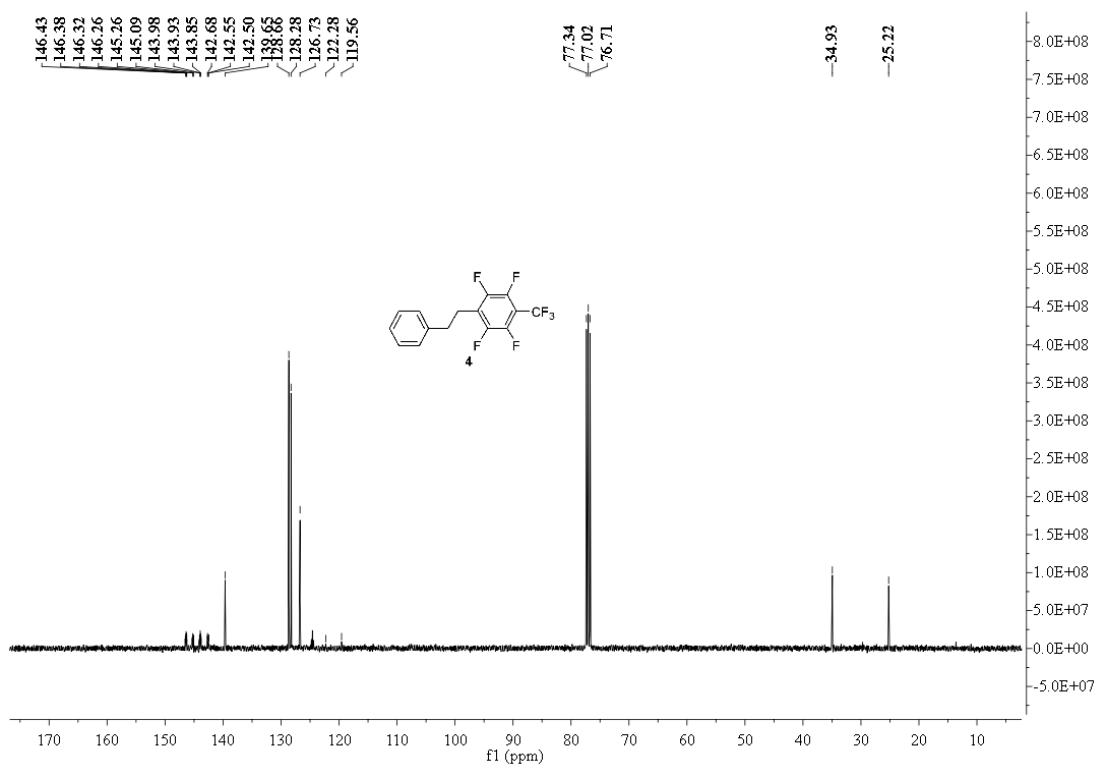

**<sup>1</sup>H NMR** (400 MHz, CDCl<sub>3</sub>) [ppm] δ 7.34 (t, *J* = 7.3 Hz, 2H), 7.30 – 7.26 (m, 1H), 7.23 (t, *J* = 9.3 Hz, 2H), 3.15 – 3.07 (m, 2H), 2.99 – 2.91 (m, 2H); **<sup>19</sup>F NMR** (376 MHz, CDCl<sub>3</sub>) [ppm] δ -56.2 (t, *J* = 22.6 Hz, 3F), -141.3 to -141.6 (m, 2F), -142.3 to -142.4 (m, 2F); **<sup>13</sup>C NMR** (100 MHz, CDCl<sub>3</sub>) [ppm] δ 25.2, 34.9, 120.9 (q, <sup>1</sup>*J*<sub>CF</sub> = 272.0

Hz), 126.7, 128.3, 128.7, 139.6, 142.5 – 142.7 (m), 143.8 – 144.1 (m), 145.0 – 145.3 (m), 146.2 – 146.6 (m); **IR** (KBr)  $\nu$  (cm<sup>-1</sup>): 2928, 2861, 1721, 1663, 1603, 1492, 1328, 1264, 1215, 1180, 1141, 940, 868, 800, 750, 704, 629, 548, 493; **HRMS** (EI) found:  $m/z$  322.0601 [M]; calcd. for C<sub>15</sub>H<sub>9</sub>F<sub>7</sub> 322.0592.

### 1-phenyl-2-(2,3,5,6-tetrafluoro-4-(trifluoromethyl)phenyl)ethanone

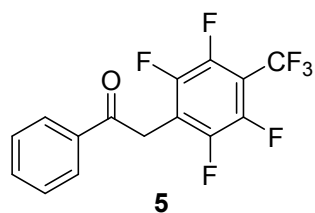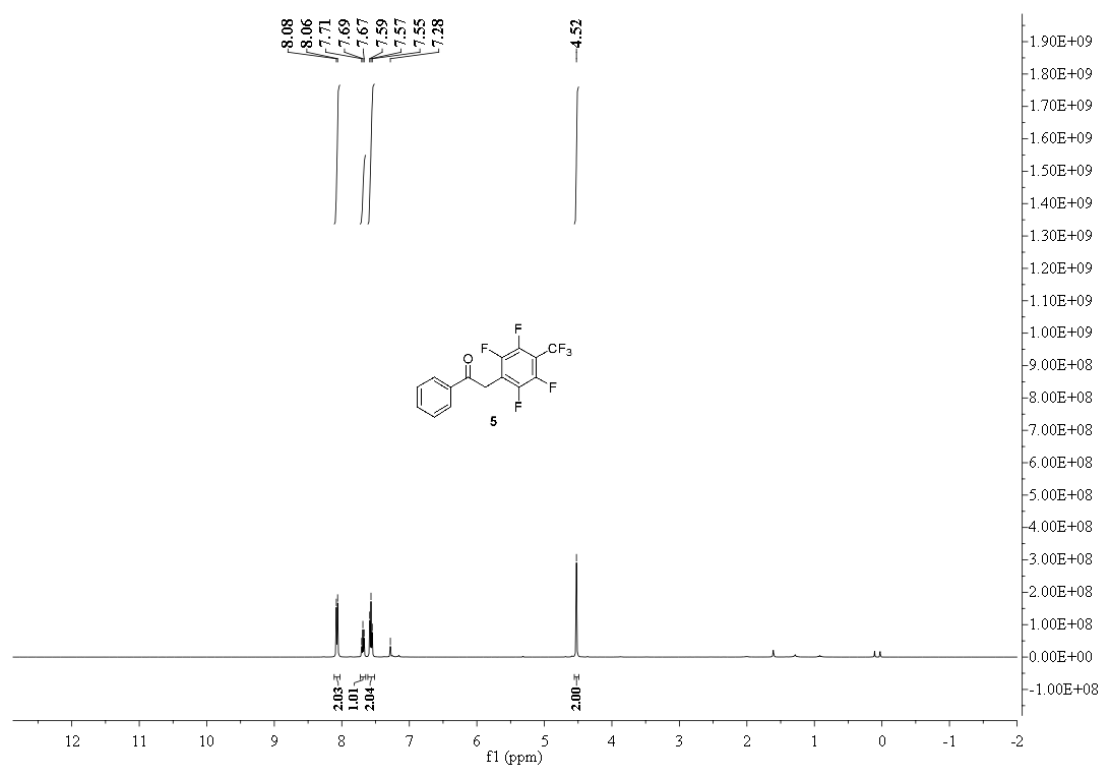

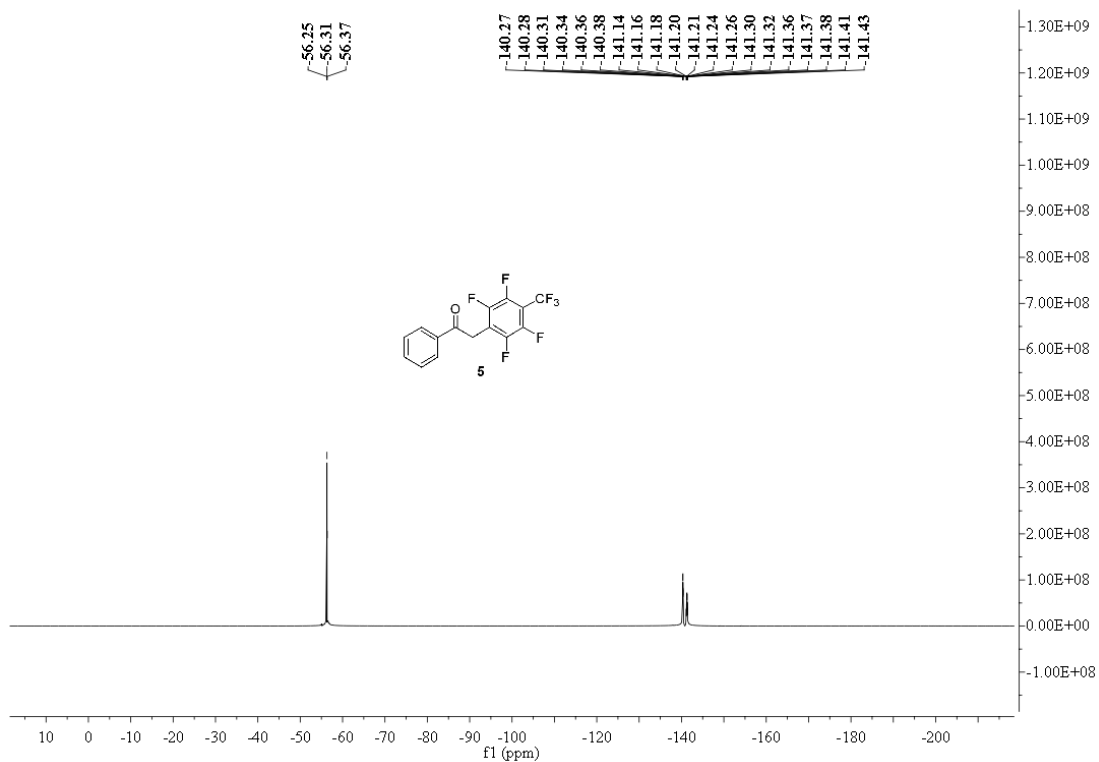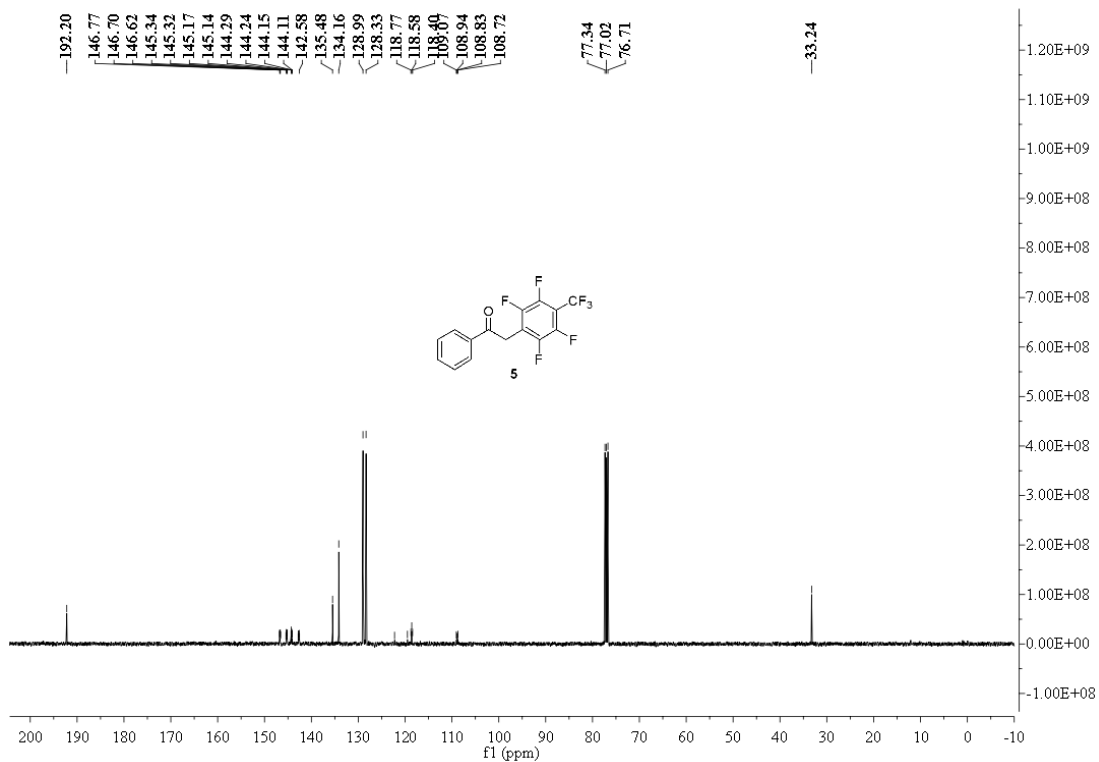

**<sup>1</sup>H NMR** (400 MHz, CDCl<sub>3</sub>) [ppm] δ 8.07 (d, *J* = 7.5 Hz, 2H), 7.69 (t, *J* = 7.4 Hz, 1H), 7.57 (t, *J* = 7.7 Hz, 2H), 4.52 (s, 2H); **<sup>19</sup>F NMR** (376 MHz, CDCl<sub>3</sub>) [ppm] δ -56.3 (t, *J* = 22.6 Hz, 3F), -140.3 to -140.4 (m, 2F), -141.1 to -141.4 (m, 2F); **<sup>13</sup>C NMR** (100 MHz, CDCl<sub>3</sub>) [ppm] δ 33.2, 108.7 – 109.1 (m), 118.4 – 118.8 (m), 120.9 (q, <sup>1</sup>*J*<sub>CF</sub> =

275.0 Hz), 128.3, 129.0, 134.2, 135.5, 142.5 – 142.8 (m), 144.1 – 144.4 (m), 145.1 – 145.4 (m), 146.6 – 146.8 (m), 192.2; **IR** (KBr)  $\nu$  (cm<sup>-1</sup>): 3056, 2987, 2957, 2933, 2306, 1686, 1593, 1493, 1451, 1419, 1332, 1266, 1210, 1146, 989, 936, 902, 740, 605, 564; **HRMS** (ESI) found:  $m/z$  335.0310 [M-H]<sup>-</sup>; calcd. for C<sub>15</sub>H<sub>7</sub>F<sub>7</sub>O-H 335.0307.

**1-phenyl-2-(2,3,5,6-tetrafluoro-4-(trifluoromethyl)phenyl)ethane-1,2-dione**

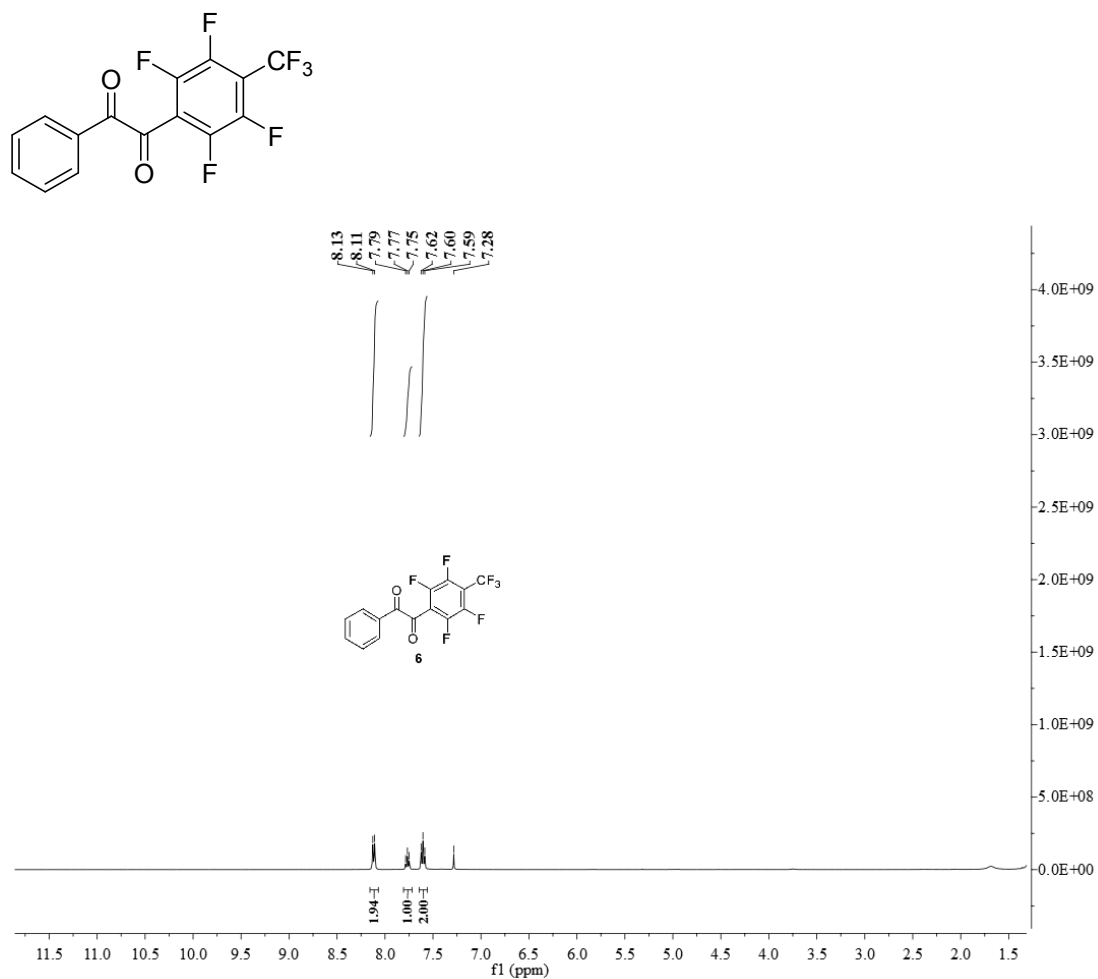

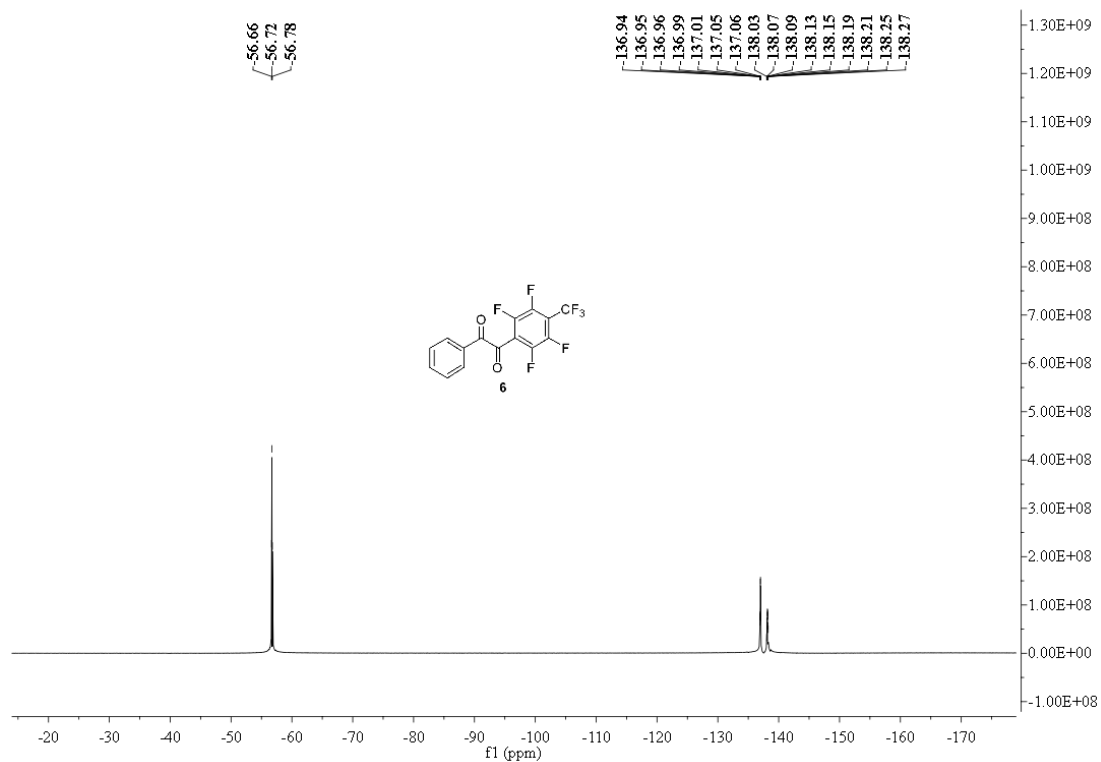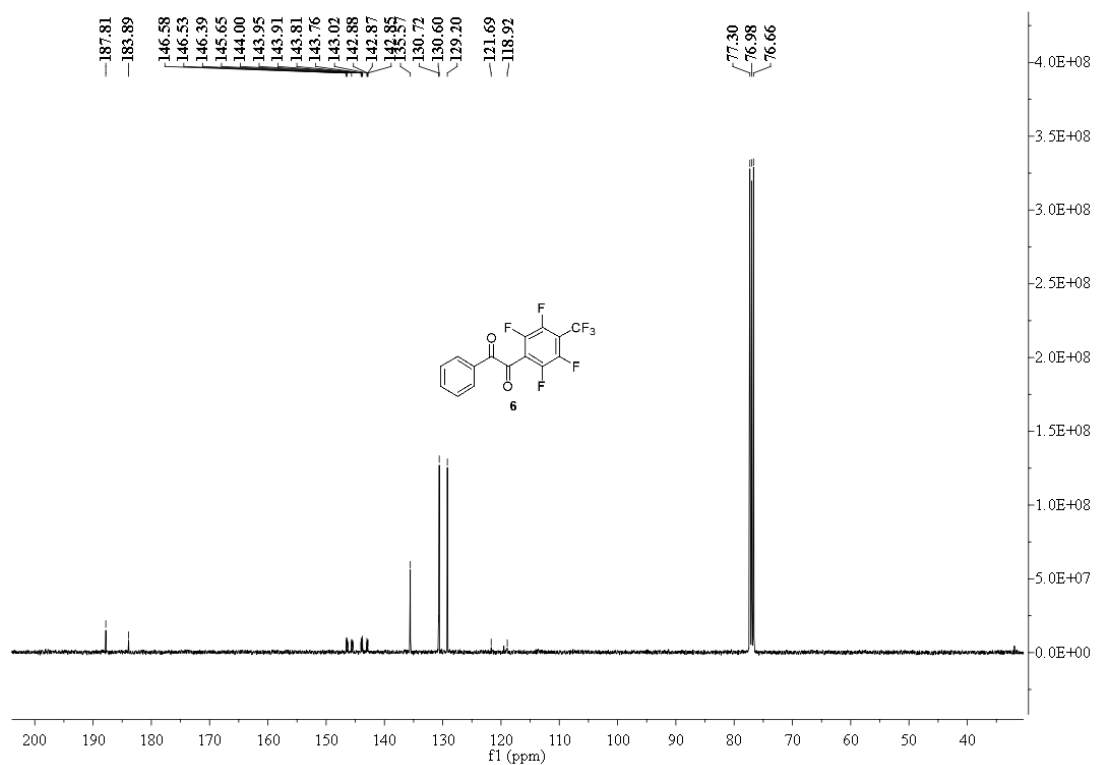

**<sup>1</sup>H NMR** (400 MHz, CDCl<sub>3</sub>) [ppm] δ 8.12 (d, *J* = 7.7 Hz, 9H), 7.77 (t, *J* = 7.4 Hz, 5H), 7.60 (t, *J* = 7.7 Hz, 10H), 7.28 (s, 2H); **<sup>19</sup>F NMR** (376 MHz, CDCl<sub>3</sub>) [ppm] δ -56.7 (t, *J* = 22.6 Hz, 3F), -136.9 to -137.1 (m, 2F), -138.0 to -138.3 (m, 2F); **<sup>13</sup>C NMR** (100 MHz, CDCl<sub>3</sub>) [ppm] δ 120.3 (q, <sup>1</sup>*J*<sub>CF</sub> = 277.0 Hz), 129.2, 130.6, 130.7, 135.6, 142.9 –

143.0 (m), 143.8 – 144.1 (m), 145.4 – 145.7 (m), 146.2 – 146.6 (m), 183.9, 187.8;  
**IR** (KBr)  $\nu$  (cm<sup>-1</sup>): 2924, 2854, 17346, 1675, 1593, 1486, 1337, 1282, 1182, 1153,  
1107, 994, 870, 807, 747, 710, 681, 647, 464; **HRMS** (ESI) found: m/z 351.0253  
[M+H]<sup>+</sup>; calcd. for C<sub>15</sub>H<sub>5</sub>F<sub>7</sub>O<sub>2</sub>+H 351.0256.

### 2-((2,3,5,6-tetrafluoro-4-(trifluoromethyl)phenyl)ethynyl)phenol

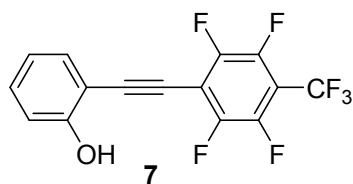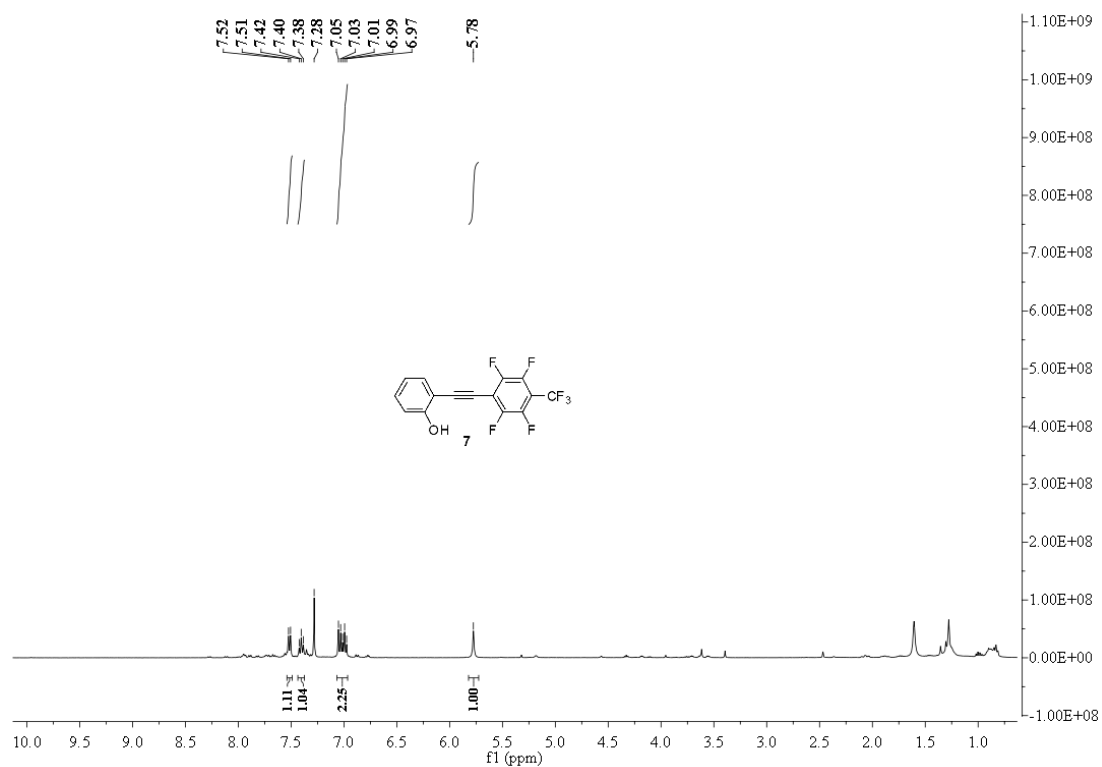



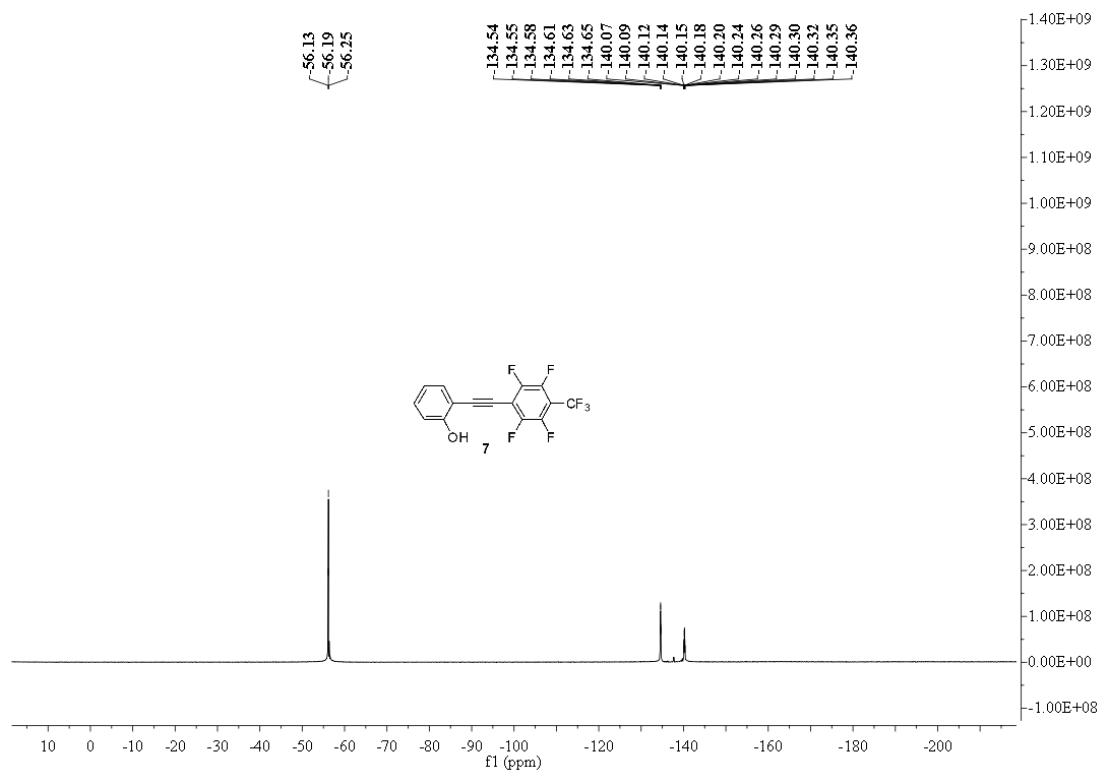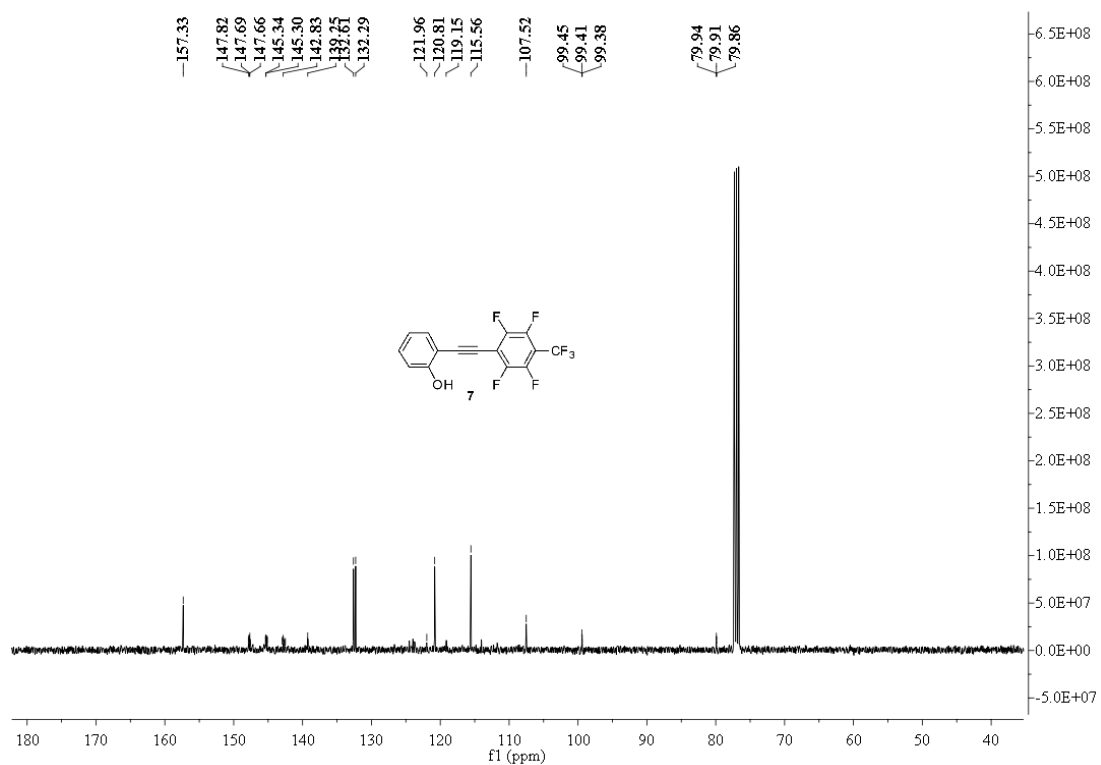

**<sup>1</sup>H NMR** (400 MHz, CDCl<sub>3</sub>) [ppm] δ 7.51 (d, *J* = 7.7 Hz, 1H), 7.40 (t, *J* = 7.8 Hz, 1H), 7.07 – 6.97 (m, 2H), 5.78 (s, 1H); **<sup>19</sup>F NMR** (376 MHz, CDCl<sub>3</sub>) [ppm] δ -56.2 (t, *J* = 22.6 Hz, 3F), -134.5 to -134.6 (m, 2F), -140.1 to -140.4 (m, 2F); **<sup>13</sup>C NMR** (100 MHz, CDCl<sub>3</sub>) [ppm] δ 79.9 (t, *J* = 4.0 Hz), 99.4 (t, *J* = 3.5 Hz), 107.5, 115.6, 120.6 (q, <sup>1</sup>*J*<sub>CF</sub>

= 281.0 Hz), 120.8, 132.3, 132.6, 139.2 – 139.3 (m), 142.5 – 143.0 (m), 145.1 – 145.4 (m), 147.6 – 147.9 (m), 157.3; **IR** (KBr)  $\nu$  ( $\text{cm}^{-1}$ ): 3690, 1571, 1485, 1340, 1264, 1178, 1138, 1023, 982, 876, 800, 758, 712, 450; **HRMS** (EI) found:  $m/z$  334.0215 [M]; calcd. for  $\text{C}_{15}\text{H}_5\text{F}_7\text{O}$  334.0229.

### Computational Details:

Molecular geometries of the model complexes were optimized without constraints via DFT calculations using the Becke3LYP(B3LYP) functional,<sup>1</sup> as implemented in the Gaussian 09 suite of programs.<sup>2</sup> The 6-31G\* basis set<sup>3</sup> was used for all atoms. Frequency calculations at the same level of theory have also been performed to identify all of the stationary points as minima (zero imaginary frequencies) or transition states (one imaginary frequency) and to provide free energies at 298.15 K which include entropic contributions by taking into account the vibrational, rotational, and translational motions of the species under consideration. Transition states were located using the Berny algorithm. Intrinsic reaction coordinates (IRC)<sup>4</sup> were calculated for the transition states to confirm that such structures indeed connect two relevant minima.

### References:

- 1 (a) B. Miehlich, A. Savin, H. Stoll and H. Preuss, *Chem. Phys. Lett.*, 1989, **157**, 200; (b) P. J. Stephens, F. J. Devlin, C. F. Chabalowski and M. J. Frisch, *J. Phys. Chem.*, 1994, **98**, 11623; (c) X. Y. Ren, C. F. Xiao and H. M. Wang, *Dalton Trans.*, 2011, **40**, 3576; (d) H. M. Wang, Y. Wang, K.-L. Han and X.-J. Peng, *J. Org. Chem.*, 2005, **70**, 4910.
- 2 M. J. Frisch, *et al.*, Gaussian, Inc., *Gaussian 09*, revision A.02, Gaussian, Inc., Wallingford, CT 2009.
- 3 P. C. Hariharan and J. A. Pople, *Theoret. chim. Acta (Berl.)*, 1973, **28**, 213.
- 4 (a) K. Ishida, K. Morokuma and A. Komornicki, *J. Chem. Phys.*, 1977, **66**, 2153; (b) K. Fukui, *Acc. Chem. Res.*, 1981, **14**, 363.

## Cartesian coordinates for all of the species calculated in this study

### octafluorotoluene

E = -1065.406823

|   |             |             |             |
|---|-------------|-------------|-------------|
| C | 0.00450100  | -1.16379100 | -0.00008400 |
| C | -0.67412000 | 0.06082500  | -0.00006200 |
| C | 0.09241500  | 1.22981100  | -0.00006800 |
| C | 1.48670800  | 1.17597800  | -0.00001200 |
| C | 2.13642700  | -0.05405400 | 0.00001100  |
| C | 1.39250000  | -1.23287300 | -0.00006900 |
| C | -2.18720400 | 0.03832900  | 0.00000000  |
| F | 2.01263500  | -2.41493300 | -0.00004200 |
| F | -0.68506600 | -2.30845800 | -0.00003000 |
| F | 3.46722200  | -0.10712900 | 0.00008900  |
| F | 2.19817800  | 2.30601400  | 0.00005900  |
| F | -0.46685000 | 2.44173000  | -0.00011600 |
| F | -2.72199000 | 1.26820500  | 0.00010500  |
| F | -2.65257700 | -0.61073100 | -1.08661300 |
| F | -2.65237000 | -0.61084700 | 1.08673800  |

### I

E = -780.297881

|    |             |             |             |
|----|-------------|-------------|-------------|
| C  | 3.76642200  | 0.14884200  | 1.22346000  |
| C  | 3.18575300  | -0.03031300 | -0.05115400 |
| C  | 4.05423500  | -0.22942500 | -1.14663400 |
| C  | 5.43593500  | -0.24786500 | -0.97282600 |
| C  | 5.99306400  | -0.06864500 | 0.29610500  |
| C  | 5.14879800  | 0.12959200  | 1.39180700  |
| H  | 3.11150200  | 0.30275300  | 2.07634200  |
| H  | 3.62306000  | -0.36833500 | -2.13387200 |
| H  | 6.08316300  | -0.40287800 | -1.83320400 |
| H  | 7.07179800  | -0.08338200 | 0.42942700  |
| H  | 5.57092200  | 0.27001800  | 2.38445100  |
| C  | 1.76820400  | -0.01095500 | -0.22599600 |
| C  | 0.53995400  | 0.00563100  | -0.37713100 |
| Li | -1.43764800 | 0.01023600  | -0.56525800 |
| O  | -2.40507000 | 1.69099400  | -0.58090800 |
| C  | -3.37863500 | 2.09403300  | 0.41101800  |
| C  | -1.52822800 | 2.80879400  | -0.90510200 |
| C  | -3.16908900 | 3.59741900  | 0.62902200  |
| H  | -4.37844500 | 1.84458600  | 0.04093400  |
| H  | -3.19085900 | 1.52276700  | 1.32984100  |
| C  | -1.68877500 | 3.78252400  | 0.25800500  |
| H  | -0.52049200 | 2.40082100  | -1.01544600 |
| H  | -1.86374900 | 3.24636900  | -1.85436200 |
| H  | -3.40172300 | 3.90253400  | 1.65347600  |
| H  | -3.80769200 | 4.17486400  | -0.04938800 |
| H  | -1.03946400 | 3.48549400  | 1.08930400  |
| H  | -1.44092000 | 4.81086100  | -0.02073600 |
| O  | -2.40370600 | -1.66605800 | -0.54927500 |
| C  | -1.52347800 | -2.81983300 | -0.66637900 |
| C  | -3.57557700 | -2.01225700 | 0.22465400  |
| C  | -1.91273300 | -3.71848800 | 0.50205100  |
| H  | -1.71155000 | -3.30545800 | -1.63321200 |
| H  | -0.49987000 | -2.43905000 | -0.63540100 |
| C  | -3.43290100 | -3.49983700 | 0.57742900  |
| H  | -3.58960700 | -1.38067200 | 1.12216800  |
| H  | -4.46873900 | -1.79374400 | -0.37017000 |
| H  | -1.42363900 | -3.37487900 | 1.42080200  |
| H  | -1.63689900 | -4.76409800 | 0.33706500  |
| H  | -3.85809000 | -3.73423700 | 1.55771700  |
| H  | -3.94324200 | -4.11982700 | -0.16848000 |

### IIp

E = -1273.400331

|   |             |             |             |
|---|-------------|-------------|-------------|
| C | -4.83733900 | 1.20057700  | 0.00000000  |
| C | -4.11103900 | -0.00714800 | -0.00004300 |
| C | -4.80973100 | -1.23111700 | -0.00004000 |
| C | -6.20132500 | -1.24104600 | 0.00001500  |
| C | -6.91400800 | -0.03903000 | 0.00006200  |
| C | -6.22881900 | 1.17887200  | 0.00005500  |
| H | -4.29882600 | 2.14306900  | -0.00000600 |
| H | -4.24989400 | -2.16110800 | -0.00007700 |

|   |             |             |             |
|---|-------------|-------------|-------------|
| H | -6.73204500 | -2.18896200 | 0.00002100  |
| H | -8.00037800 | -0.05140800 | 0.00010600  |
| H | -6.78096900 | 2.11446100  | 0.00009100  |
| C | -2.68785000 | 0.00835900  | -0.00009100 |
| C | -1.47272200 | 0.02105300  | 0.00000000  |
| C | -0.05857000 | 0.02860700  | -0.00002200 |
| C | 0.68278500  | -1.16679300 | -0.00000800 |
| C | 0.67192800  | 1.22735800  | -0.00001700 |
| C | 2.06911500  | -1.15257800 | -0.00000400 |
| C | 2.06412500  | 1.24020200  | -0.00001400 |
| C | 2.79237800  | 0.04661400  | -0.00000400 |
| F | 0.02319800  | 2.39664500  | -0.00001900 |
| F | 0.04577900  | -2.34206700 | -0.00000600 |
| F | 2.72153100  | -2.32149800 | 0.00001200  |
| F | 2.66775400  | 2.43320700  | -0.00000900 |

### TSp

E = -1845.705203

|    |             |             |             |
|----|-------------|-------------|-------------|
| C  | 0.42271900  | 3.91783900  | 0.73626500  |
| C  | 0.17899100  | 3.09724100  | -0.38619000 |
| C  | 0.48205900  | 3.60774400  | -1.66685400 |
| C  | 1.00642800  | 4.88860700  | -1.81509400 |
| C  | 1.24065300  | 5.68981100  | -0.69439900 |
| C  | 0.94700100  | 5.19773900  | 0.58012100  |
| H  | 0.20005100  | 3.53215000  | 1.72668300  |
| H  | 0.30487600  | 2.98224900  | -2.53671600 |
| H  | 1.23631300  | 5.26348900  | -2.80914400 |
| H  | 1.65127000  | 6.68885100  | -0.81313500 |
| H  | 1.13044100  | 5.81407700  | 1.45650100  |
| C  | -0.35495000 | 1.78473600  | -0.22892600 |
| C  | -0.83700300 | 0.65229400  | -0.09038000 |
| C  | 0.01341500  | -1.20796800 | 0.17956900  |
| C  | 0.76343000  | -1.49791900 | -0.98070700 |
| C  | 0.73759000  | -1.16195700 | 1.38829200  |
| C  | 2.14026700  | -1.43028300 | -0.96618800 |
| C  | 2.11848700  | -1.09375200 | 1.39684600  |
| C  | 2.86895500  | -1.23034700 | 0.21850100  |
| F  | -1.23582600 | -1.86655400 | 0.25761400  |
| F  | 0.04601600  | -0.99245000 | 2.53790200  |
| F  | 0.09927300  | -1.66413400 | -2.14625100 |
| F  | 2.79235400  | -1.60777600 | -2.12632300 |
| F  | 2.71407200  | -0.93563400 | 2.58812000  |
| C  | 4.36940000  | -1.22979600 | 0.16896300  |
| F  | 4.83049400  | -0.41982500 | -0.81056900 |
| F  | 4.86188200  | -2.46650100 | -0.08895700 |
| F  | 4.92564900  | -0.81536700 | 1.32214700  |
| Li | -2.58696100 | -0.47547800 | 0.02780100  |
| O  | -3.54803400 | -0.32557900 | 1.71099200  |
| C  | -3.43984300 | -1.38589200 | 2.70122200  |
| C  | -3.45761900 | 0.97141400  | 2.36269500  |
| C  | -3.49849600 | -0.69133700 | 4.06371100  |
| H  | -4.25701800 | -2.09346700 | 2.53143900  |
| H  | -2.48166700 | -1.89362400 | 2.55120800  |
| C  | -2.88905200 | 0.68372600  | 3.74980700  |
| H  | -2.81443000 | 1.60479400  | 1.74653100  |
| H  | -4.46513100 | 1.40400500  | 2.41270600  |
| H  | -2.94645200 | -1.24337600 | 4.82970400  |
| H  | -4.53661200 | -0.58504200 | 4.39990400  |
| H  | -1.79766500 | 0.61232300  | 3.69860400  |
| H  | -3.15689000 | 1.45367400  | 4.47932300  |
| O  | -3.47135700 | -0.80516700 | -1.66814300 |
| C  | -3.33045500 | 0.24088000  | -2.66813800 |
| C  | -3.37350600 | -2.11152900 | -2.30006700 |
| C  | -2.73202700 | -0.45212100 | -3.88955300 |
| H  | -4.32494600 | 0.65584200  | -2.87731600 |
| H  | -2.68959800 | 1.01766600  | -2.24350900 |
| C  | -3.37169500 | -1.84697700 | -3.80773600 |
| H  | -2.43824000 | -2.57718600 | -1.97290700 |
| H  | -4.21911700 | -2.71743500 | -1.96073100 |
| H  | -1.64490400 | -0.52538800 | -3.78210900 |
| H  | -2.95802000 | 0.07443100  | -4.82149500 |
| H  | -2.81401700 | -2.61045800 | -4.35758100 |
| H  | -4.39595500 | -1.82394900 | -4.19787100 |

### IIm

E = -1273.400999

|   |             |             |             |
|---|-------------|-------------|-------------|
| C | 4.41298400  | -1.44255200 | 0.00021700  |
| C | 3.88787700  | -0.13483800 | -0.00004900 |
| C | 4.77330600  | 0.96147100  | -0.00023700 |
| C | 6.14882400  | 0.74929700  | -0.00015400 |
| C | 6.66129800  | -0.55065400 | 0.00011400  |
| C | 5.79021100  | -1.64322500 | 0.00029700  |
| H | 3.73122700  | -2.28727800 | 0.00035900  |
| H | 4.36950200  | 1.96909900  | -0.00044200 |
| H | 6.82366300  | 1.60075400  | -0.00029800 |
| H | 7.73576100  | -0.71157600 | 0.00018000  |
| H | 6.18555900  | -2.65516400 | 0.00050500  |
| C | 2.47969200  | 0.07596200  | -0.00011100 |
| C | 1.27791000  | 0.25470100  | -0.00010700 |
| C | -0.12125700 | 0.46979000  | -0.00010200 |
| C | -0.65987700 | 1.76632400  | -0.00002000 |
| C | -1.03537700 | -0.60317100 | -0.00015100 |
| C | -2.03217300 | 1.98746600  | 0.00004100  |
| C | -2.41851200 | -0.41988000 | -0.00013800 |
| C | -2.89426200 | 0.89781200  | 0.00000700  |
| F | -0.51815100 | -1.83498000 | -0.00020700 |
| F | 0.15507300  | 2.82158800  | 0.00005000  |
| F | -2.51840300 | 3.23274900  | 0.00015000  |
| C | -3.43551500 | -1.53911900 | -0.00001900 |
| F | -4.20922600 | 1.13165900  | 0.00011200  |
| F | -2.87382400 | -2.75677500 | -0.00076200 |
| F | -4.23140000 | -1.45818900 | 1.08737600  |
| F | -4.23256700 | -1.45740200 | -1.08648900 |

**Tsm**

E = -1845.693761

|    |             |             |             |
|----|-------------|-------------|-------------|
| C  | -0.11521700 | 4.16490600  | 0.98928100  |
| C  | 0.63464900  | 3.05922900  | 0.54216600  |
| C  | 2.03692500  | 3.18310100  | 0.44788100  |
| C  | 2.66022000  | 4.37922700  | 0.79382300  |
| C  | 1.90765800  | 5.46723100  | 1.24341500  |
| C  | 0.51885200  | 5.35420100  | 1.34050600  |
| H  | -1.19613400 | 4.07898100  | 1.05745900  |
| H  | 2.61886500  | 2.33689200  | 0.09777700  |
| H  | 3.74095500  | 4.46111000  | 0.71320900  |
| H  | 2.39992800  | 6.39719900  | 1.51488200  |
| H  | -0.07350800 | 6.19727300  | 1.68688800  |
| C  | 0.00562800  | 1.82800700  | 0.17971500  |
| C  | -0.49162400 | 0.73414600  | -0.12086500 |
| C  | -0.21393500 | -1.95455000 | -0.52104900 |
| C  | 0.18345700  | -0.73152900 | -1.11808800 |
| C  | 0.63159200  | -2.77490200 | 0.19698500  |
| C  | 1.60128800  | -0.62095400 | -1.21334000 |
| C  | 2.00564900  | -2.54879900 | 0.17559300  |
| C  | 2.49626100  | -1.43851200 | -0.52818700 |
| F  | -1.57936800 | -2.11980900 | -0.36315200 |
| F  | 0.12056600  | -3.81255400 | 0.88632900  |
| F  | -0.53840100 | -0.38921700 | -2.27267100 |
| F  | 2.06726500  | 0.49789300  | -1.81073700 |
| F  | 2.80272100  | -3.41799100 | 0.82545700  |
| C  | 3.96173800  | -1.08473300 | -0.59708400 |
| F  | 4.19540900  | 0.13461800  | -0.04935200 |
| F  | 4.39854600  | -1.03043600 | -1.87336800 |
| F  | 4.74360600  | -1.96166800 | 0.05554800  |
| Li | -2.35422000 | -0.29986000 | 0.08277100  |
| O  | -2.89189200 | -0.63449800 | 1.92098000  |
| C  | -2.92648200 | -1.96378600 | 2.51264100  |
| C  | -2.56819400 | 0.35136500  | 2.93469900  |
| C  | -2.71451400 | -1.76053100 | 4.01680200  |
| H  | -3.88976300 | -2.42212000 | 2.26766400  |
| H  | -2.12629600 | -2.55774800 | 2.06039900  |
| C  | -1.92433000 | -0.44305600 | 4.06692900  |
| H  | -1.90657500 | 1.08945400  | 2.47494300  |
| H  | -3.49643900 | 0.84093600  | 3.25838800  |
| H  | -2.18271400 | -2.60034100 | 4.47278200  |
| H  | -3.67603500 | -1.64795600 | 4.53085400  |
| H  | -0.86482500 | -0.61853900 | 3.84888400  |
| H  | -1.99701300 | 0.06795800  | 5.03137400  |
| O  | -3.65139200 | 0.16192800  | -1.27517200 |
| C  | -3.58613900 | 1.52937200  | -1.76503700 |
| C  | -3.88115400 | -0.75157600 | -2.38461000 |

|   |             |             |             |
|---|-------------|-------------|-------------|
| C | -3.36319100 | 1.40603600  | -3.26951900 |
| H | -4.53573400 | 2.02678200  | -1.52814000 |
| H | -2.76711800 | 2.02835000  | -1.24100000 |
| C | -4.15445000 | 0.13185800  | -3.60465800 |
| H | -2.97813200 | -1.35511300 | -2.51753000 |
| H | -4.71819900 | -1.40410400 | -2.11836700 |
| H | -2.29789500 | 1.26085700  | -3.47413400 |
| H | -3.71026100 | 2.28729600  | -3.81690500 |
| H | -3.83080300 | -0.34342200 | -4.53502600 |
| H | -5.22460900 | 0.35435600  | -3.68965900 |

**IIo**

E = -1273.394937

|   |             |             |             |
|---|-------------|-------------|-------------|
| C | 4.06552600  | -0.97850900 | -0.00016800 |
| C | 3.39919100  | 0.26358700  | 0.00002300  |
| C | 4.15670800  | 1.45156500  | 0.00014700  |
| C | 5.54729700  | 1.39367700  | 0.00006800  |
| C | 6.20029800  | 0.15825500  | -0.00013000 |
| C | 5.45632800  | -1.02485700 | -0.00024700 |
| H | 3.47938600  | -1.89219500 | -0.00025900 |
| H | 3.64264000  | 2.40767700  | 0.00030000  |
| H | 6.12383800  | 2.31450800  | 0.00016200  |
| H | 7.28601900  | 0.11747400  | -0.00019100 |
| H | 5.96229200  | -1.98627000 | -0.00040200 |
| C | 1.97682500  | 0.31148000  | 0.00008100  |
| C | 0.76199200  | 0.30788600  | -0.00004000 |
| C | -0.65301800 | 0.40549900  | -0.00001100 |
| C | -1.20574700 | 1.70074600  | -0.00000700 |
| C | -1.54831800 | -0.69517600 | -0.00024000 |
| C | -2.57702900 | 1.91945500  | 0.00001100  |
| C | -2.92270300 | -0.45618600 | -0.00018900 |
| C | -3.44638000 | 0.83303500  | -0.00019400 |
| F | -0.39994700 | 2.76798900  | 0.00011900  |
| F | -3.06306400 | 3.16162100  | 0.00008900  |
| F | -4.76628600 | 1.02776600  | -0.00020500 |
| C | -1.11855800 | -2.14769300 | 0.00010000  |
| F | 0.21403100  | -2.30745100 | -0.00068400 |
| F | -1.60127100 | -2.78802100 | -1.08657700 |
| F | -1.59990900 | -2.78700600 | 1.08802400  |
| F | -3.78895900 | -1.47687400 | -0.00019300 |

**TSo**

E = -1845.704728

|    |             |             |             |
|----|-------------|-------------|-------------|
| C  | -2.14031400 | 0.07760600  | 3.63969400  |
| C  | -1.83355000 | -0.65182500 | 2.47192900  |
| C  | -2.54246900 | -1.84661600 | 2.21831500  |
| C  | -3.51853800 | -2.29207300 | 3.10463800  |
| C  | -3.80891100 | -1.56199900 | 4.26073000  |
| C  | -3.11655700 | -0.37662600 | 4.52232100  |
| H  | -1.60399600 | 1.00056800  | 3.83988800  |
| H  | -2.31856700 | -2.40151300 | 1.31229900  |
| H  | -4.05762500 | -3.21187000 | 2.89245900  |
| H  | -4.57091300 | -1.91289600 | 4.95151900  |
| H  | -3.34050500 | 0.19724200  | 5.41801900  |
| C  | -0.83822600 | -0.20883500 | 1.55353600  |
| C  | 0.02767900  | 0.10919100  | 0.72727700  |
| C  | -1.89265500 | 2.39351200  | -1.45671200 |
| C  | -0.59364900 | 2.07208400  | -1.13380000 |
| C  | -2.73664400 | 1.43280400  | -2.02687200 |
| C  | -0.12286700 | 0.73647200  | -1.20290400 |
| C  | -2.24116200 | 0.15472000  | -2.22827700 |
| C  | -0.92406600 | -0.20123800 | -1.91498600 |
| F  | -2.34334800 | 3.63951900  | -1.26786900 |
| F  | -3.99689000 | 1.75205200  | -2.36346100 |
| F  | 0.20218400  | 3.00032100  | -0.55776500 |
| F  | 1.27671500  | 0.67779100  | -1.43367600 |
| F  | -3.06247800 | -0.75746900 | -2.77346900 |
| C  | -0.51622800 | -1.63338200 | -2.07041200 |
| F  | -1.11521600 | -2.45034400 | -1.16207800 |
| F  | 0.82147000  | -1.81130600 | -1.90546000 |
| F  | -0.82662500 | -2.12465900 | -3.28726900 |
| Li | 2.06258200  | 0.08590300  | 0.26784300  |
| O  | 3.14445800  | 1.57153300  | 0.92488600  |
| C  | 3.47620500  | 2.71235900  | 0.08609300  |
| C  | 2.74328500  | 2.02697400  | 2.24530100  |

|   |            |             |             |
|---|------------|-------------|-------------|
| C | 3.45698200 | 3.93209600  | 1.01180800  |
| H | 4.45278200 | 2.52572200  | -0.37127500 |
| H | 2.71648900 | 2.78819600  | -0.69724600 |
| C | 2.43531600 | 3.51288800  | 2.08021000  |
| H | 1.87954000 | 1.43092100  | 2.55177800  |
| H | 3.57505200 | 1.85378800  | 2.94049700  |
| H | 3.17502400 | 4.84582400  | 0.48087600  |
| H | 4.44317600 | 4.09035900  | 1.46393700  |
| H | 1.41589300 | 3.64343700  | 1.70331700  |
| H | 2.53672200 | 4.06745400  | 3.01781900  |
| O | 2.97656900 | -1.61631200 | 0.35229600  |
| C | 2.24143700 | -2.80423000 | 0.75964200  |
| C | 4.08118100 | -1.98073700 | -0.50952600 |
| C | 2.72346000 | -3.91402600 | -0.17196400 |
| H | 2.48718600 | -3.01427100 | 1.80813500  |
| H | 1.17696200 | -2.57905500 | 0.67732100  |
| C | 4.18220900 | -3.50621600 | -0.43300500 |
| H | 3.85389300 | -1.64303600 | -1.52889400 |
| H | 4.97723600 | -1.46227200 | -0.15514400 |
| H | 2.14669900 | -3.89700700 | -1.10201300 |
| H | 2.62709800 | -4.90632600 | 0.27821400  |
| H | 4.59732700 | -3.93964500 | -1.34760300 |
| H | 4.82073700 | -3.80563800 | 0.40632600  |

**Li (thf)<sub>2</sub>F**

E = -572.3867838

|    |             |             |             |
|----|-------------|-------------|-------------|
| F  | -0.00015700 | 2.14557800  | 0.36284000  |
| Li | -0.00035800 | 0.85987800  | -0.65050700 |
| O  | 1.76947200  | 0.07313300  | -0.93135600 |
| C  | 2.68944800  | 0.97443400  | -0.23171200 |
| C  | 2.15484900  | -1.27674400 | -0.63997100 |
| C  | 3.38852000  | 0.12016600  | 0.84933500  |
| H  | 3.39804300  | 1.37576800  | -0.96488100 |
| H  | 2.05543600  | 1.77036200  | 0.16966800  |
| C  | 2.63522200  | -1.22553100 | 0.80830900  |
| H  | 1.28352300  | -1.91681200 | -0.80942900 |
| H  | 2.95829800  | -1.59239400 | -1.32237200 |
| H  | 3.33431300  | 0.59172300  | 1.83424100  |
| H  | 4.44671400  | -0.02630700 | 0.60691900  |
| H  | 1.77053500  | -1.20302200 | 1.48141800  |
| H  | 3.26263000  | -2.07957500 | 1.08148600  |
| O  | -1.76980400 | 0.07297900  | -0.93165400 |
| C  | -2.15446500 | -1.27698200 | -0.63965400 |
| C  | -2.68991100 | 0.97415400  | -0.23194100 |
| C  | -2.63453400 | -1.22544800 | 0.80871300  |
| H  | -2.95790500 | -1.59328500 | -1.32175900 |
| H  | -1.28286200 | -1.91668800 | -0.80905300 |
| C  | -3.38853900 | 0.11985400  | 0.84934300  |
| H  | -2.05604000 | 1.77028500  | 0.16926300  |
| H  | -3.39871500 | 1.37521800  | -0.96504800 |
| H  | -1.76970500 | -1.20218700 | 1.48161500  |
| H  | -3.26142500 | -2.07971400 | 1.08238100  |
| H  | -3.33458900 | 0.59173700  | 1.83410800  |
| H  | -4.44665300 | -0.02725100 | 0.60695900  |
